# Supplementary material for: Synthesis of N-methyl secondary amides via diboronic acid anhydride-catalyzed dehydrative condensation of carboxylic acids with aqueous methylamine
Source: Royal Society of Chemistry journal article supplement (doi:10.1039/d4ob02022g), 2025-01-01

## Supporting Information

### Synthesis of *N*-methyl secondary amides via diboronic acid anhydride-catalyzed dehydrative condensation of carboxylic acids with aqueous methylamine

Hinata Iwasawa,<sup>a</sup> Naoya Takahashi,<sup>b</sup> and Naoyuki Shimada<sup>a\*</sup>

<sup>a</sup> Laboratory of Organic Chemistry for Molecular Transformations, Department of Chemistry and the Institute of Natural Sciences, Nihon University, Tokyo 156-8550, Japan

<sup>b</sup> Laboratory of Organic Chemistry for Drug Development and Medical Research Laboratories, Department of Pharmaceutical Sciences, Kitasato University, Tokyo 108-8641, Japan

#### Table of Contents

|                                                   |    |
|---------------------------------------------------|----|
| 1. Supplementary Information                      | S2 |
| 2. <sup>1</sup> H and <sup>13</sup> C NMR spectra | S4 |

## 1. Supplementary Information

SI-Table 1. Optimization of solvent for the diboronic acid anhydride-catalyzed amidation of  $\alpha$ -hydroxycarboxylic acid.

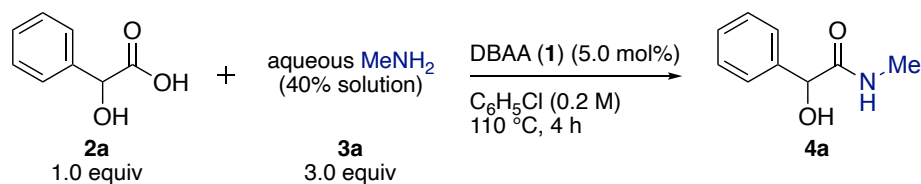

| Entry | Solvent                      | NMR yield <sup>a</sup> |
|-------|------------------------------|------------------------|
| 1     | toluene                      | 62%                    |
| 2     | ethylbenzene                 | 23%                    |
| 3     | mesitylene                   | 23%                    |
| 4     | <i>m</i> -xylene             | 18%                    |
| 5     | <i>o</i> -xylene             | 58%                    |
| 6     | DMF                          | n.d.                   |
| 7     | <b><math>C_6H_5Cl</math></b> | <b>70%</b>             |
| 8     | $C_6H_5CF_3$                 | 10%                    |

<sup>a</sup> Determined by  $^1H$  NMR of a crude reaction mixture of products using 1,1,2,2-tetrachloroethane as an internal standard.

SI-Table 2. Optimization of molar equivalent of methyl amine (**3a**) for the diboronic acid anhydride-catalyzed amidation of  $\alpha$ -hydroxycarboxylic acid.

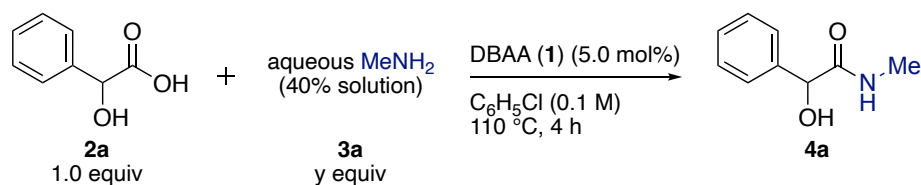

| Entry | Equivalent of <b>3a</b> | NMR yield <sup>a</sup> |
|-------|-------------------------|------------------------|
| 1     | 2                       | 92%                    |
| 2     | 1                       | 88%                    |
| 3     | 5                       | 7%                     |

<sup>a</sup> Determined by  $^1H$  NMR of a crude reaction mixture of products using 1,1,2,2-tetrachloroethane as an internal standard.

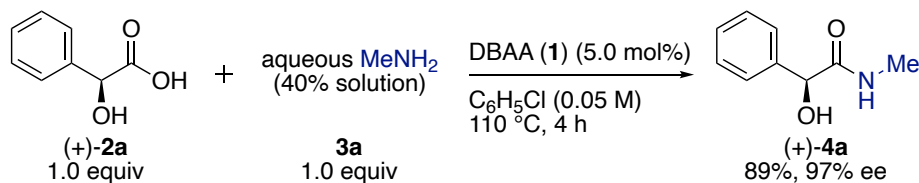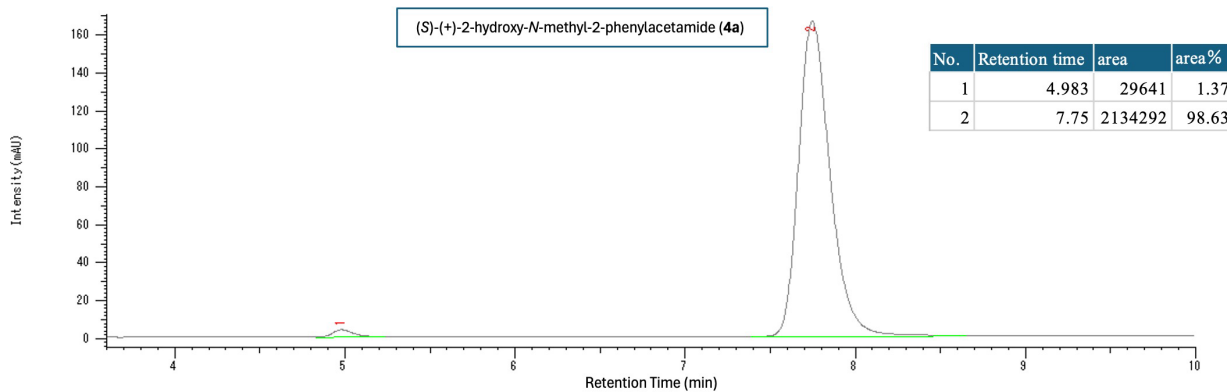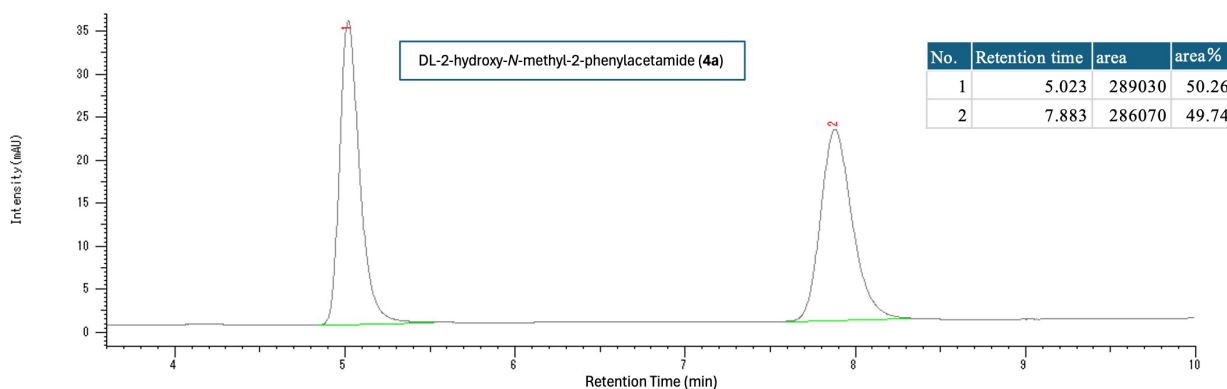

**SI-Figure 1. Charts of chiral HPLC analysis of amide (+)-4a derived from (+)-mandelic acid ((+)-2a) (Scheme 2F).**

The enantiomeric excess (ee) was determined by chiral HPLC analysis [CHIRALPAK® IH-3 ( $\phi$  4.6 mm  $\times$  250 mm), hexane/IPA = 50:50, 210 nm, flow rate 1.2 mL/min,  $t_R$  = 5.0 min (minor), 7.9 min (major)]. The racemic sample was prepared by DBAA (1)-catalyzed amidation of ( $\pm$ )-mandelic acid (2a) with aqueous methylamine (3a) (40% solution).

## 2. $^1\text{H}$ and $^{13}\text{C}$ NMR spectra

### $^1\text{H}$ NMR spectrum of 2g (500 MHz, $\text{DMSO-}d_6$ )

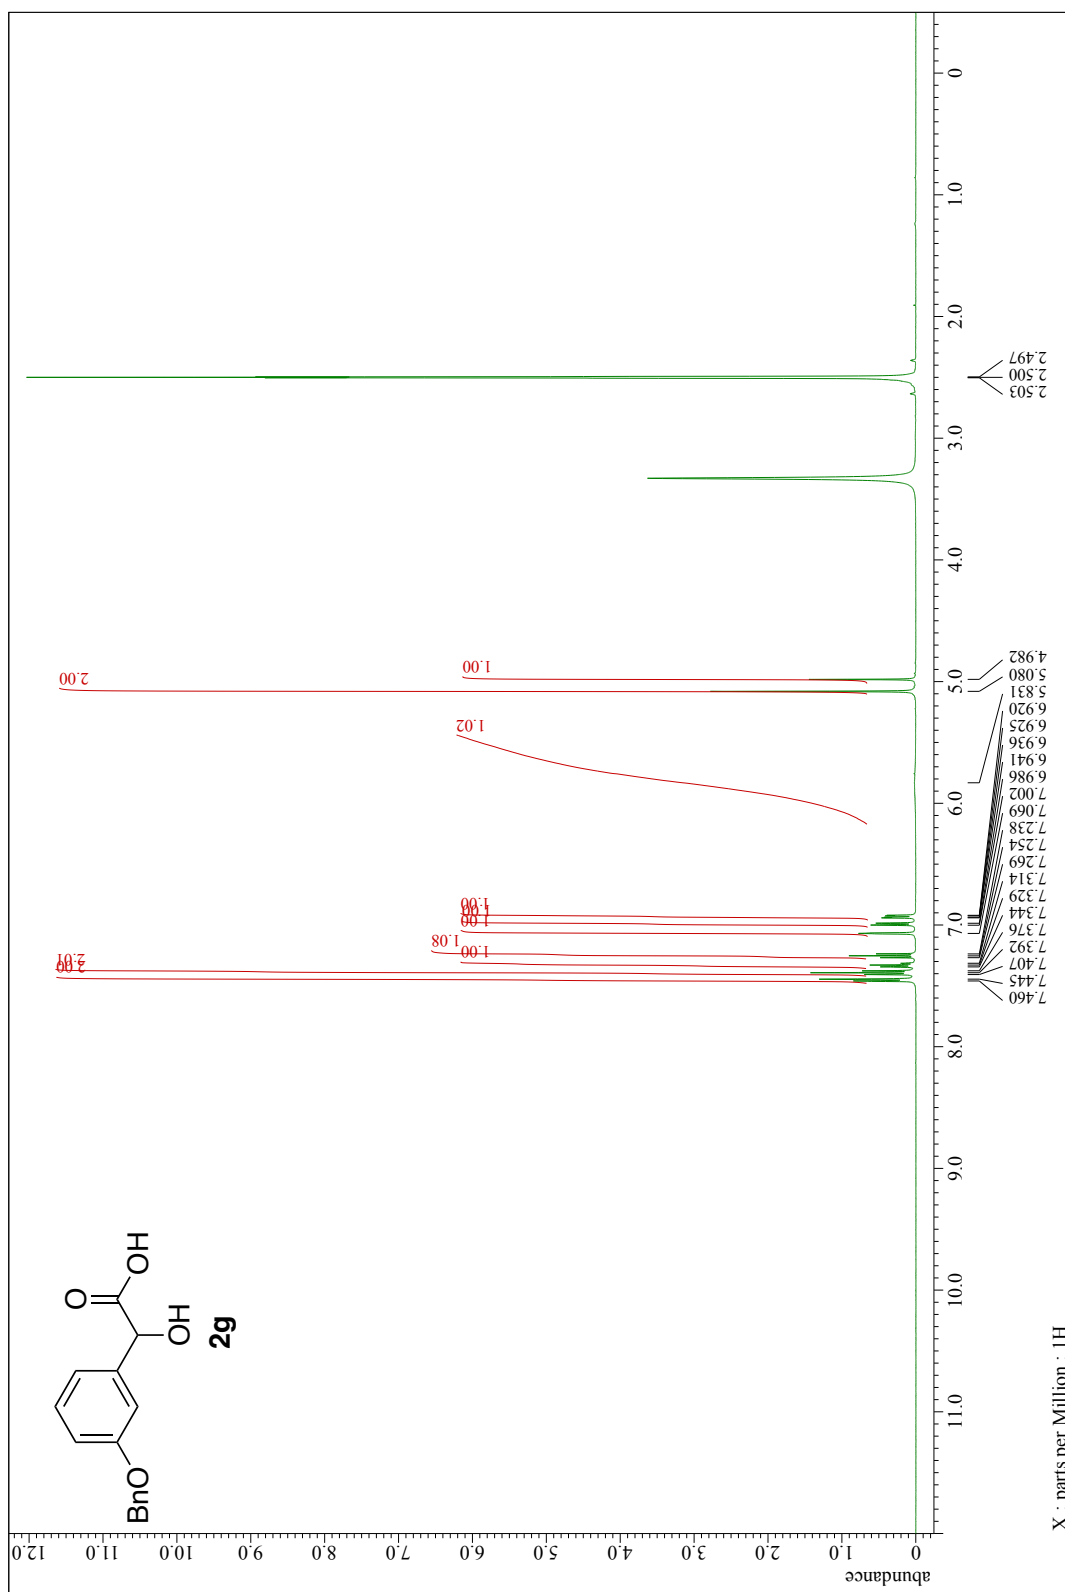



**<sup>13</sup>C NMR spectrum of 2g (126 MHz, DMSO-*d*<sub>6</sub>)**

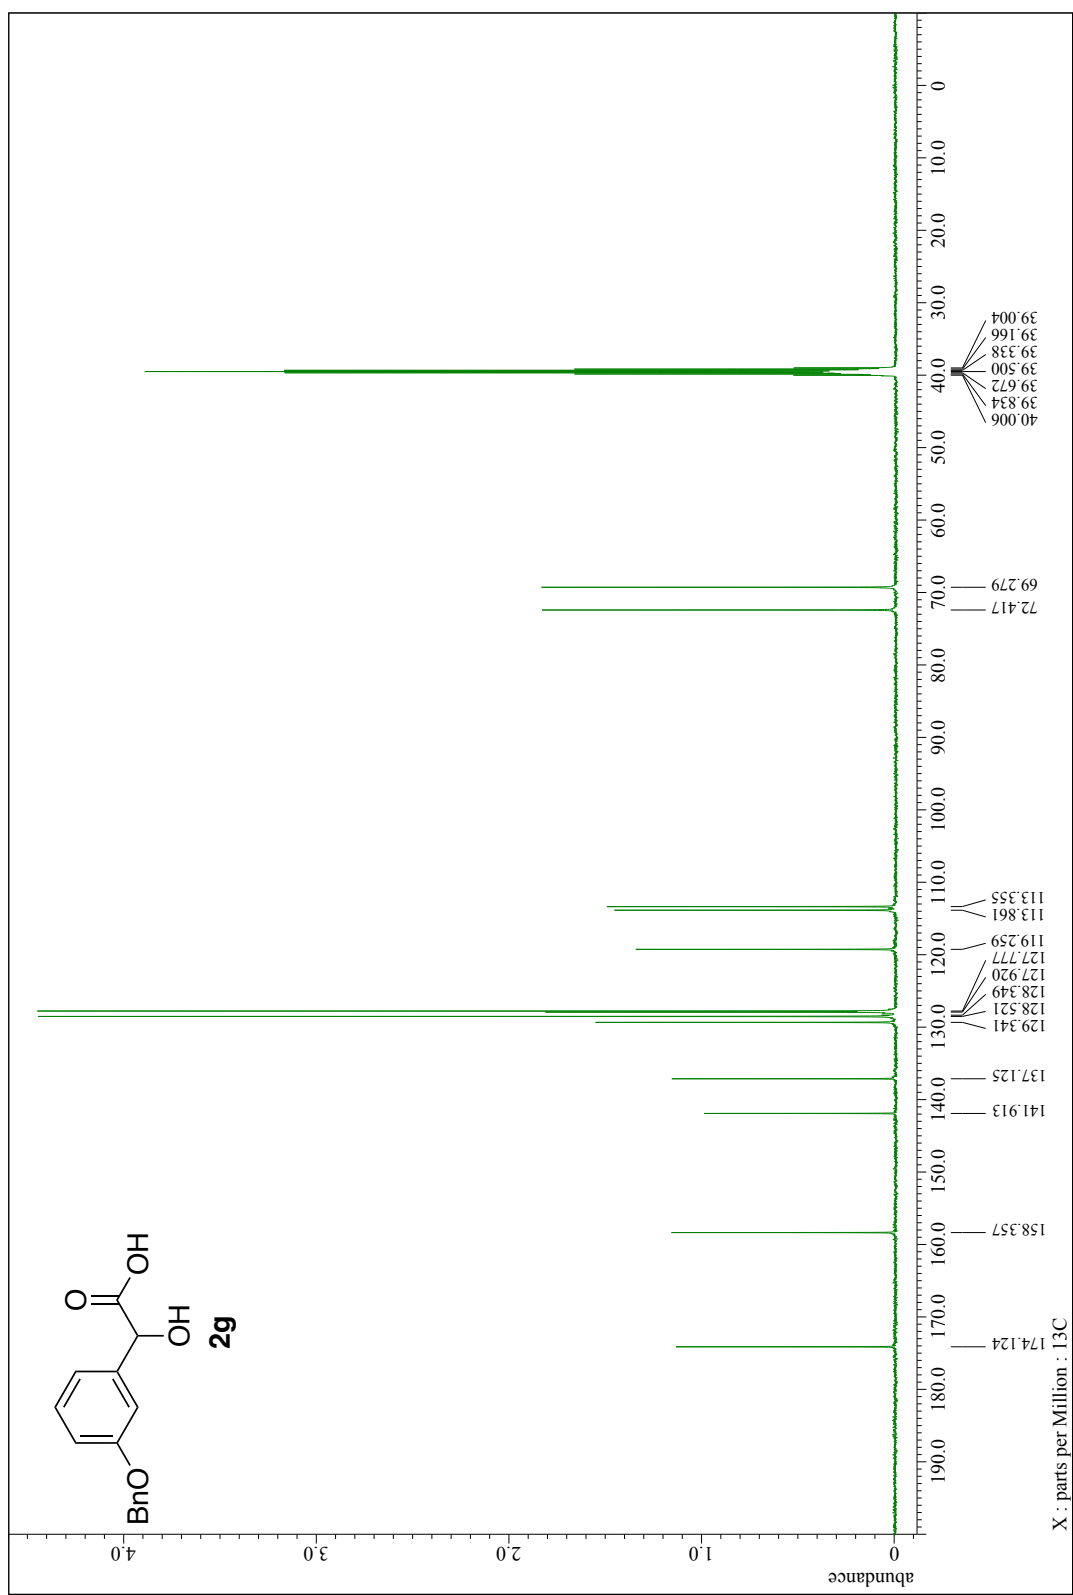

**<sup>1</sup>H NMR spectrum of 2i (500 MHz, DMSO-d6)**

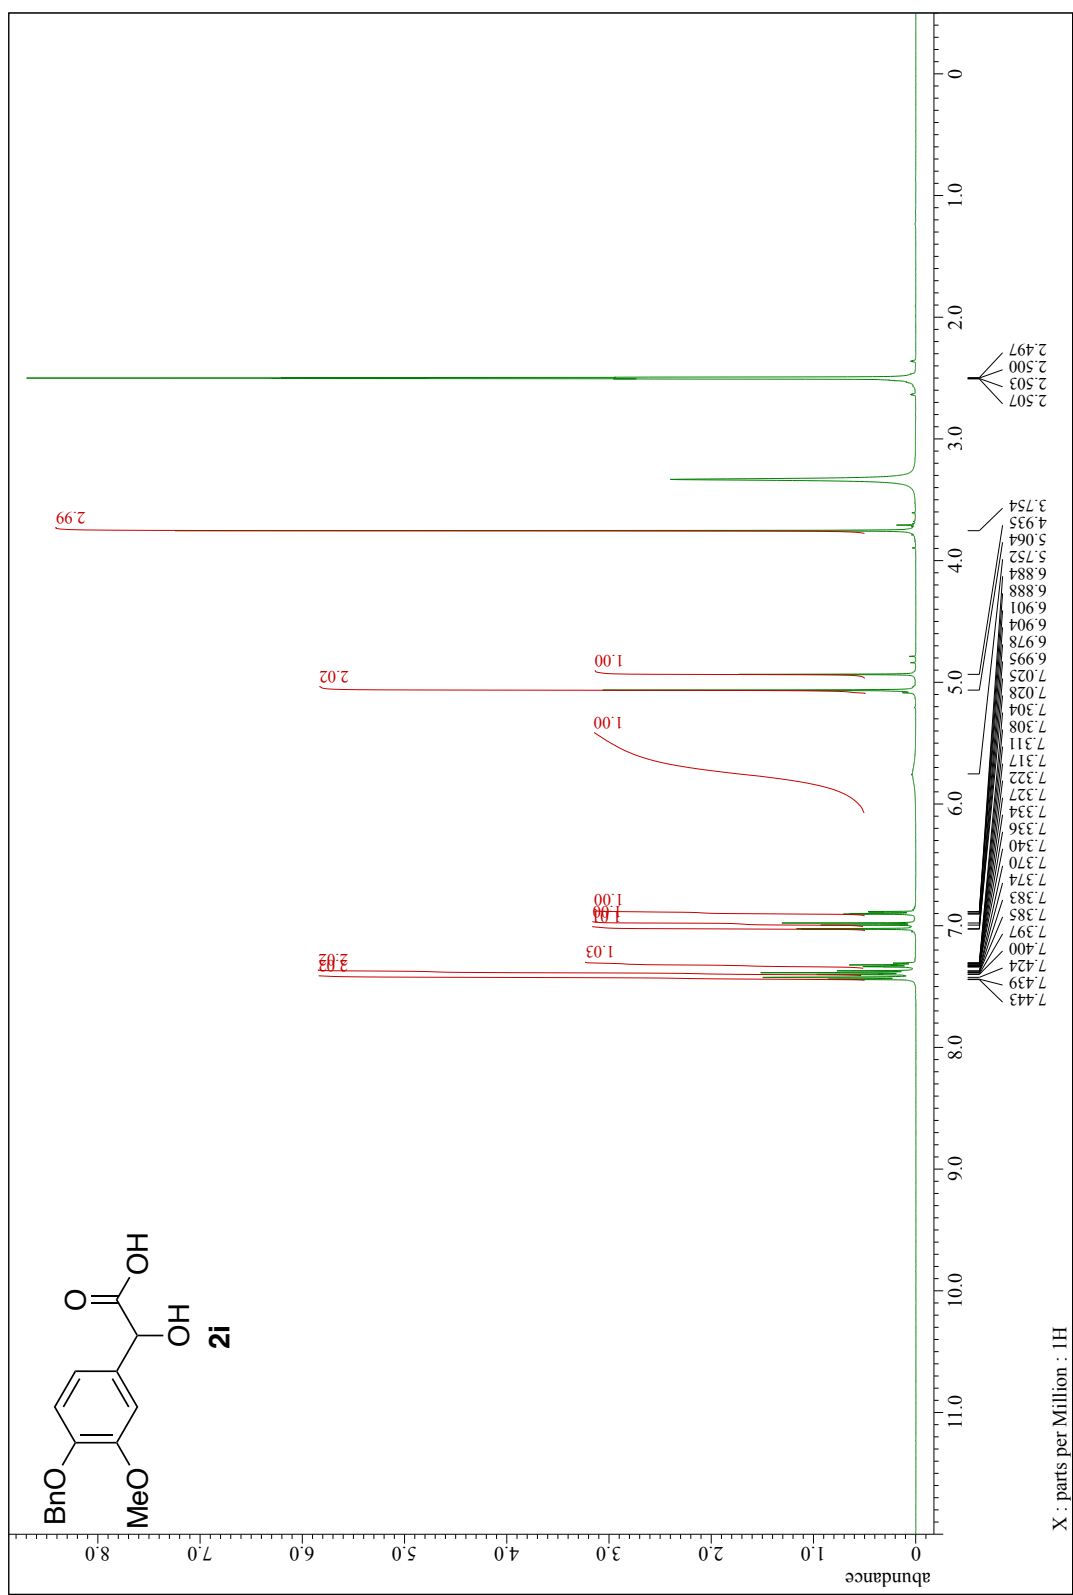

**<sup>13</sup>C NMR spectrum of 2i (126 MHz, DMSO-*d*<sub>6</sub>)**

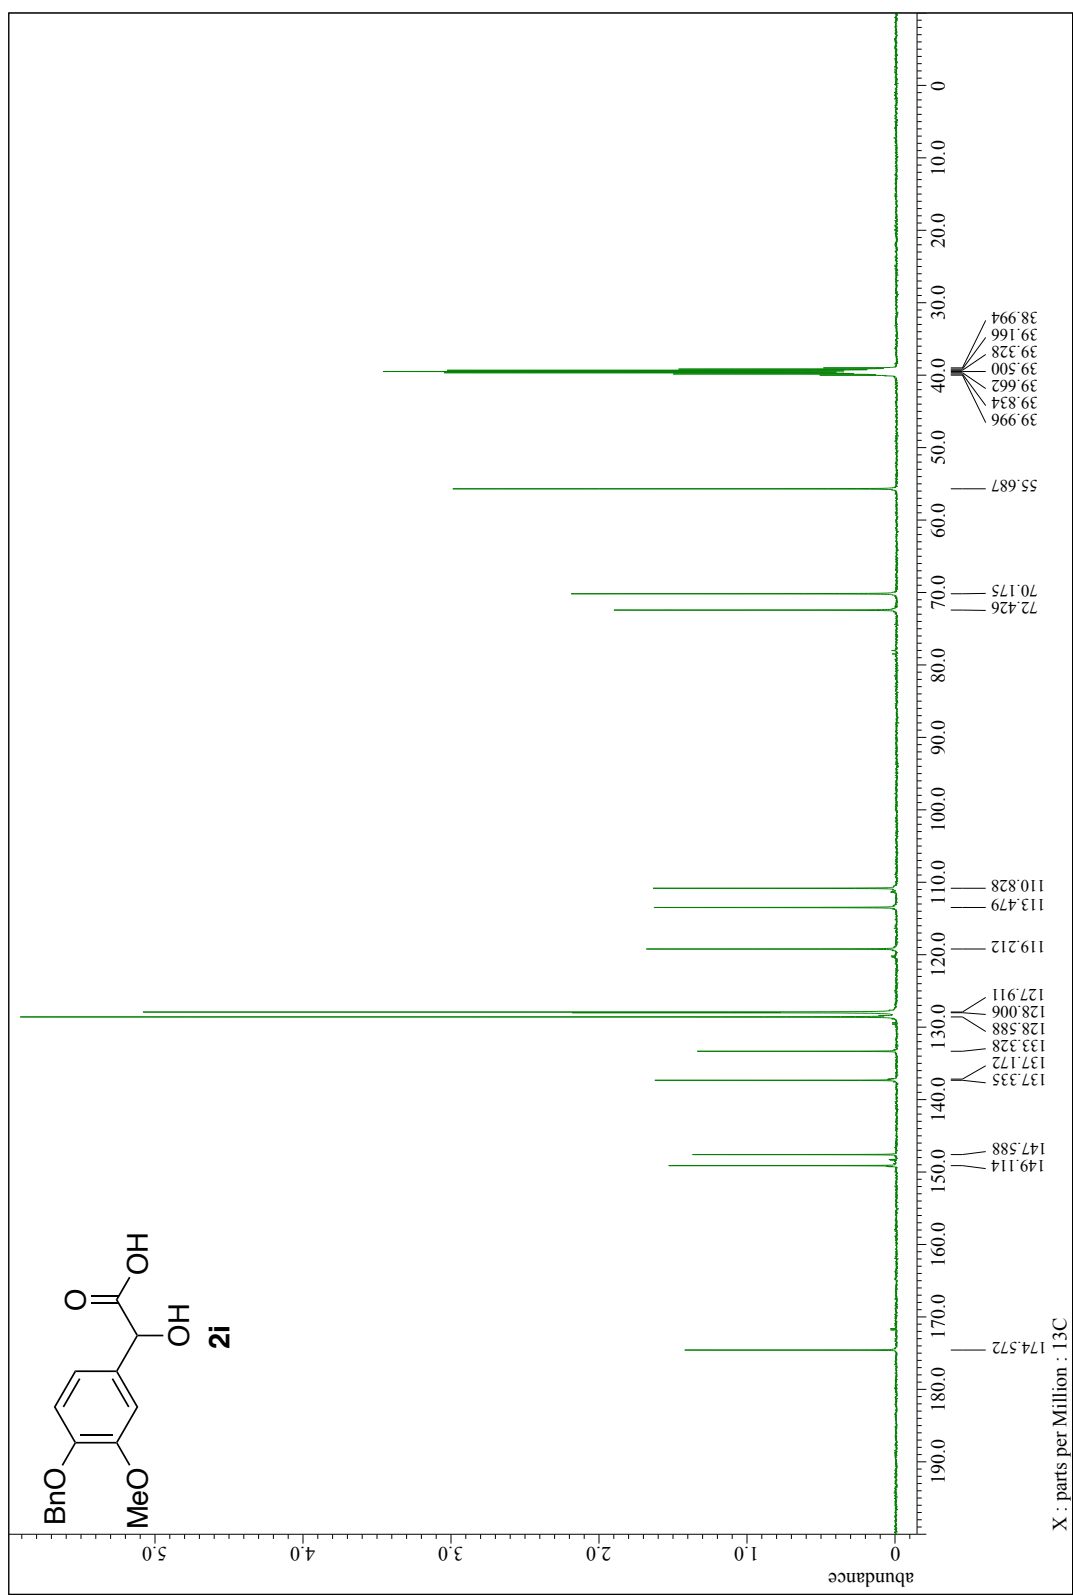

**$^1\text{H}$  NMR spectrum of 4a (500 MHz,  $\text{CDCl}_3$ )**

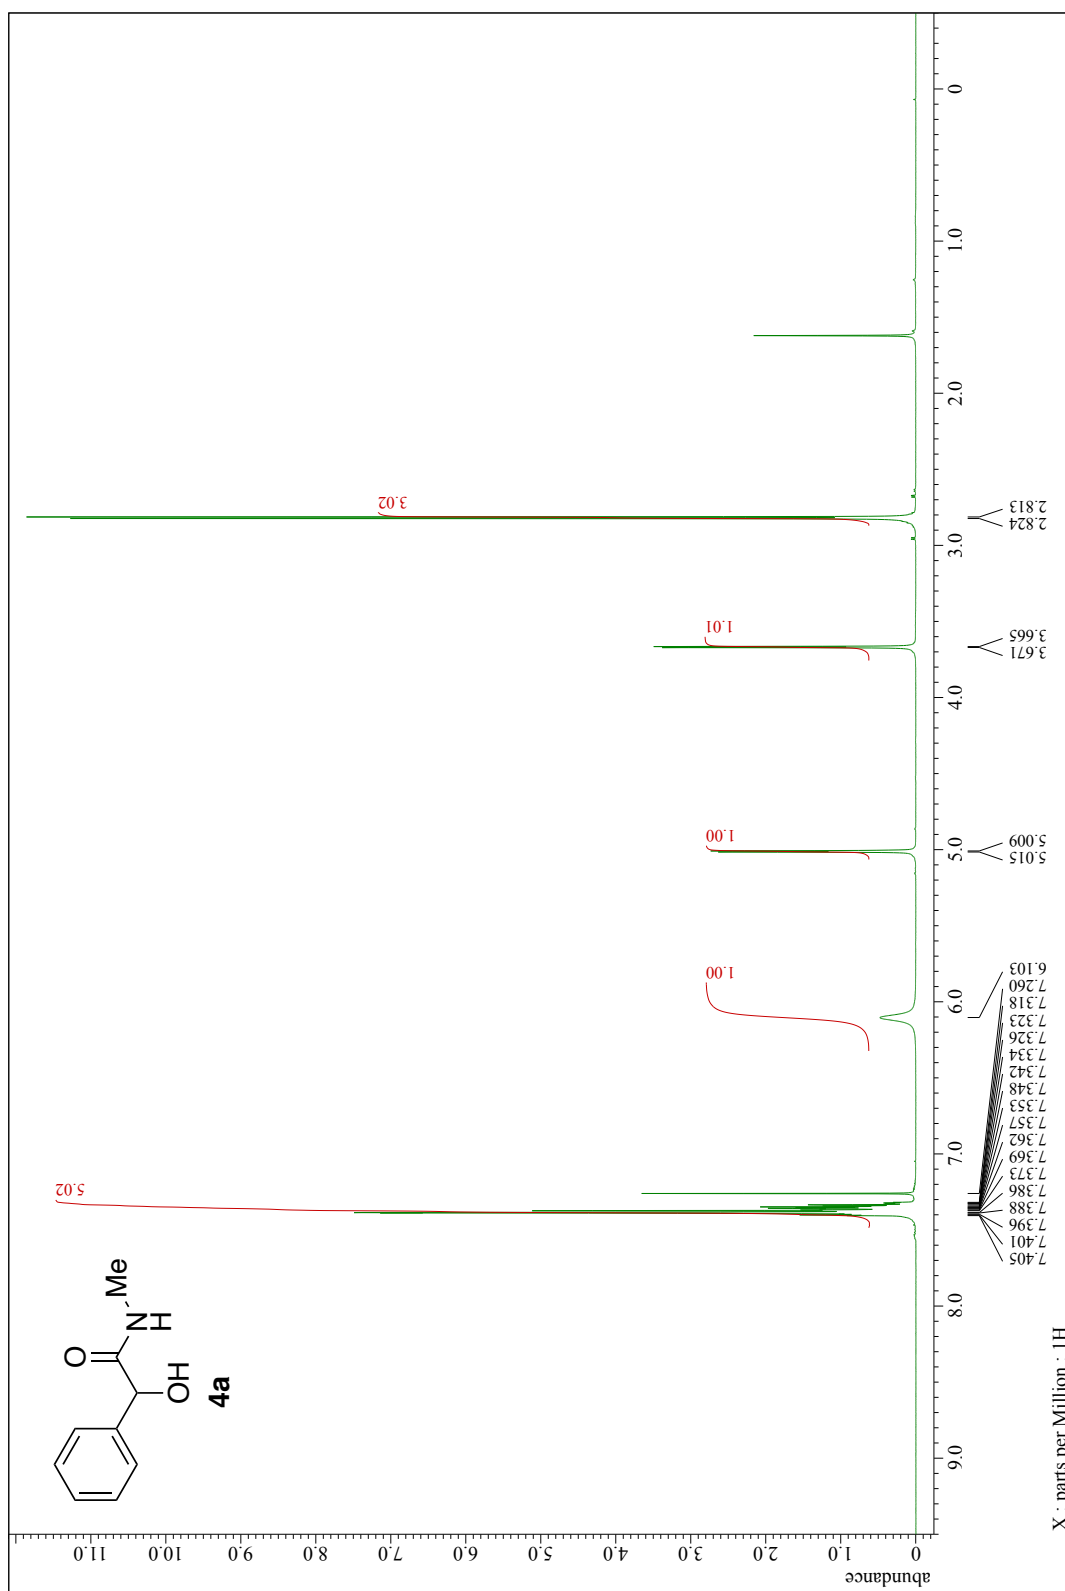

**$^{13}\text{C}$  NMR spectrum of 4a (126 MHz,  $\text{CDCl}_3$ )**

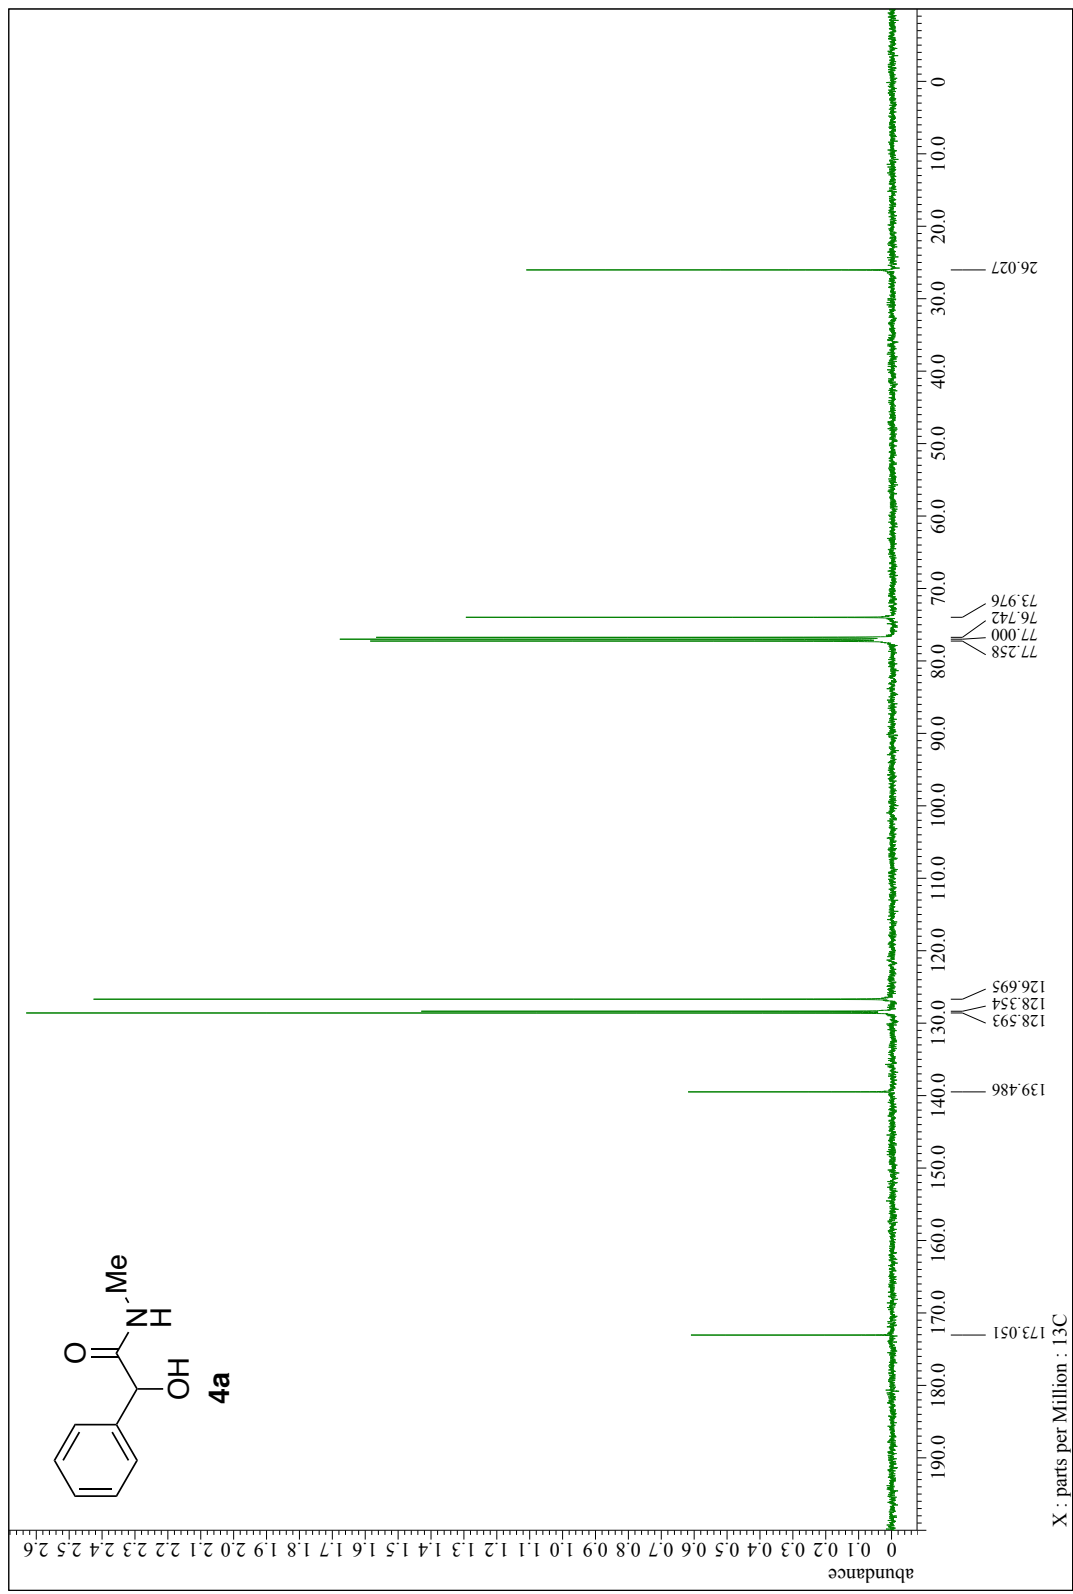

**<sup>1</sup>H NMR spectrum of 4b (500 MHz, CDCl<sub>3</sub>)**

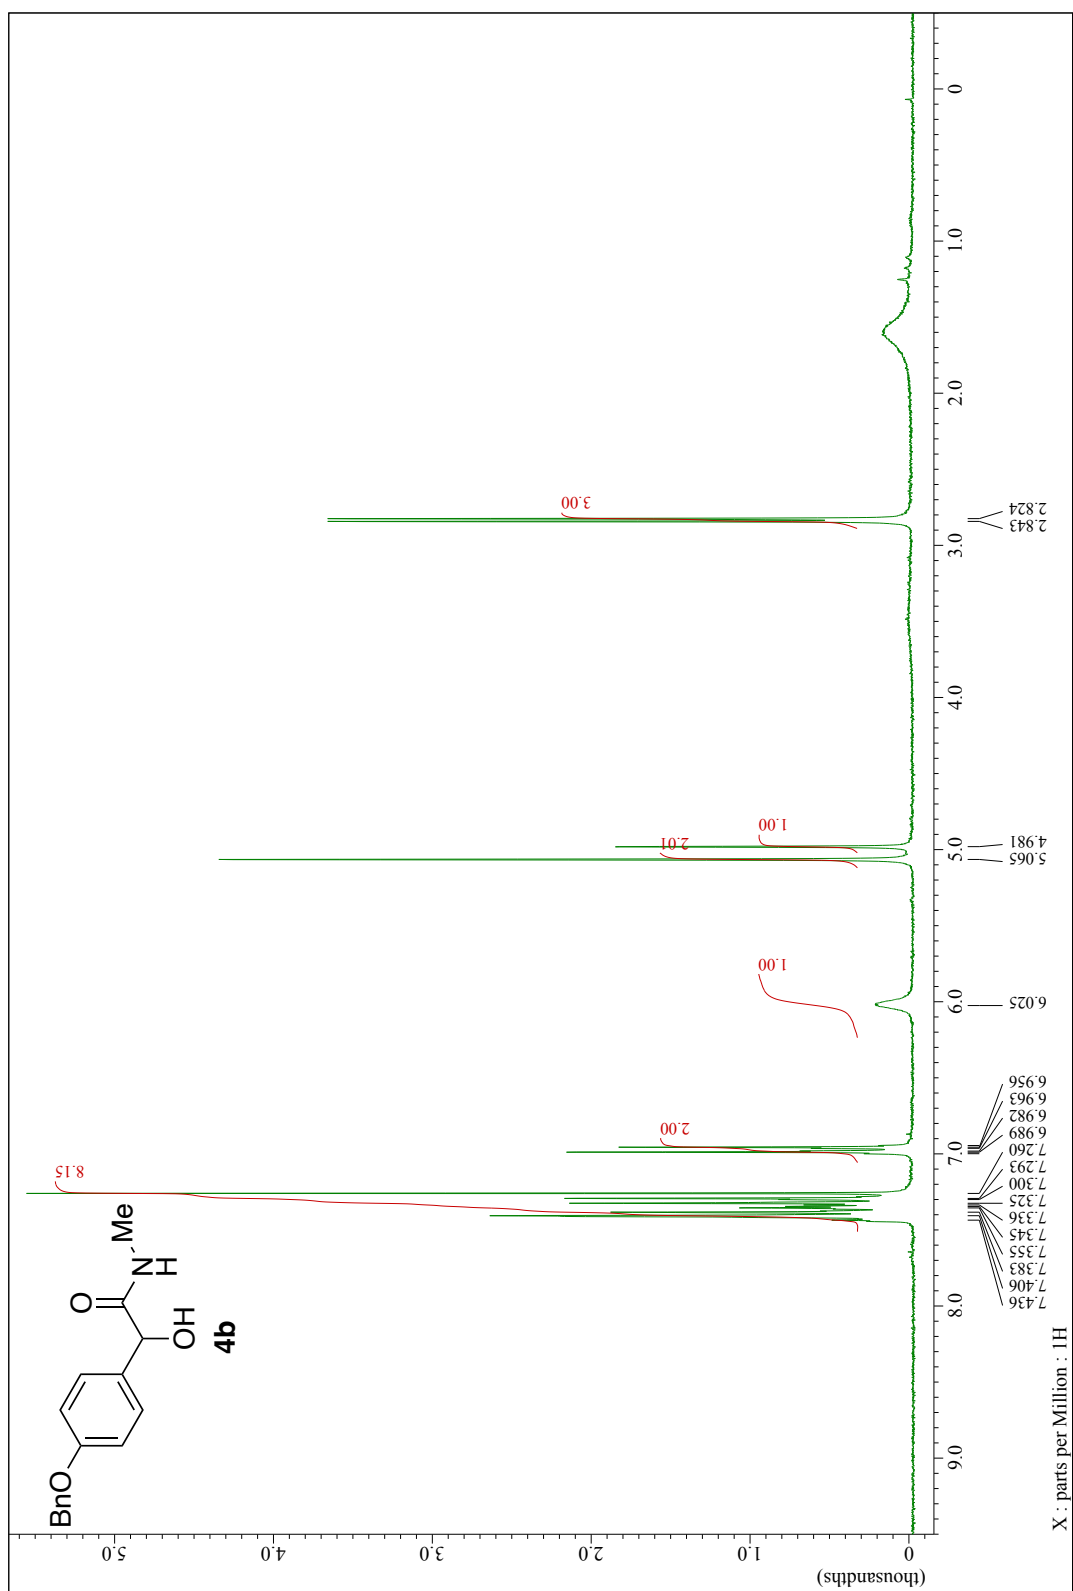

**$^{13}\text{C}$  NMR spectrum of 4b (126 MHz,  $\text{CDCl}_3$ )**

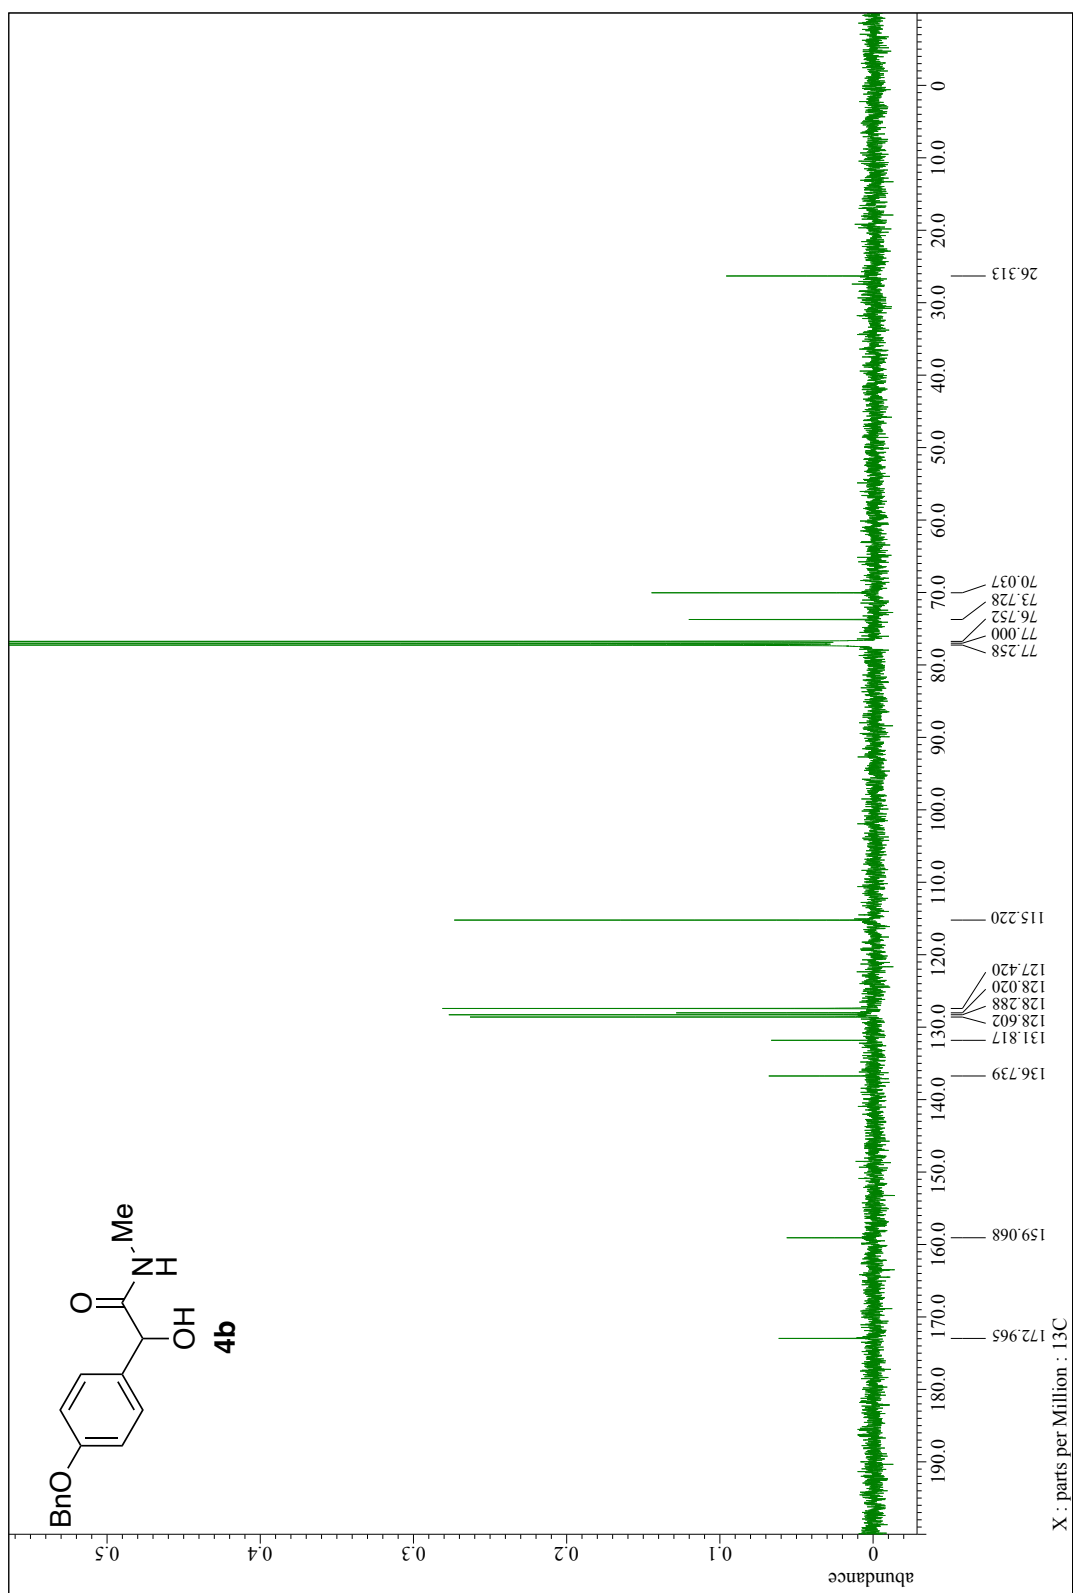

# <sup>1</sup>H NMR spectrum of 4c (500 MHz, CDCl<sub>3</sub>)

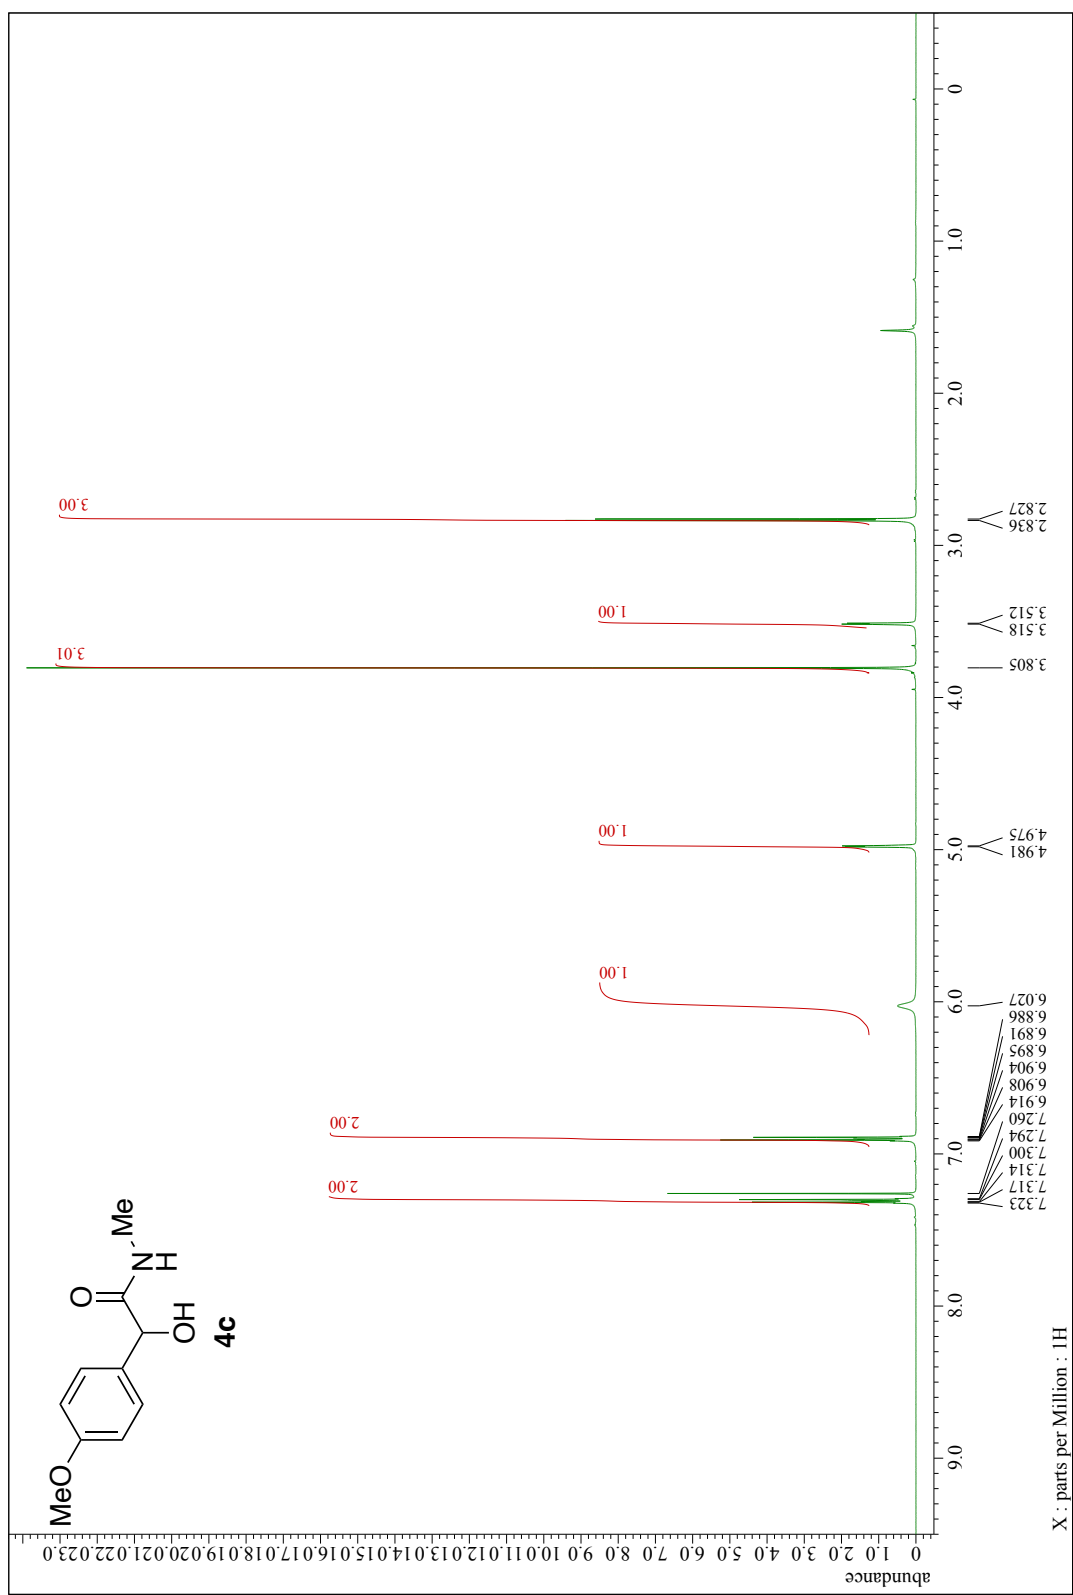



**$^{13}\text{C}$  NMR spectrum of 4c (126 MHz,  $\text{CDCl}_3$ )**

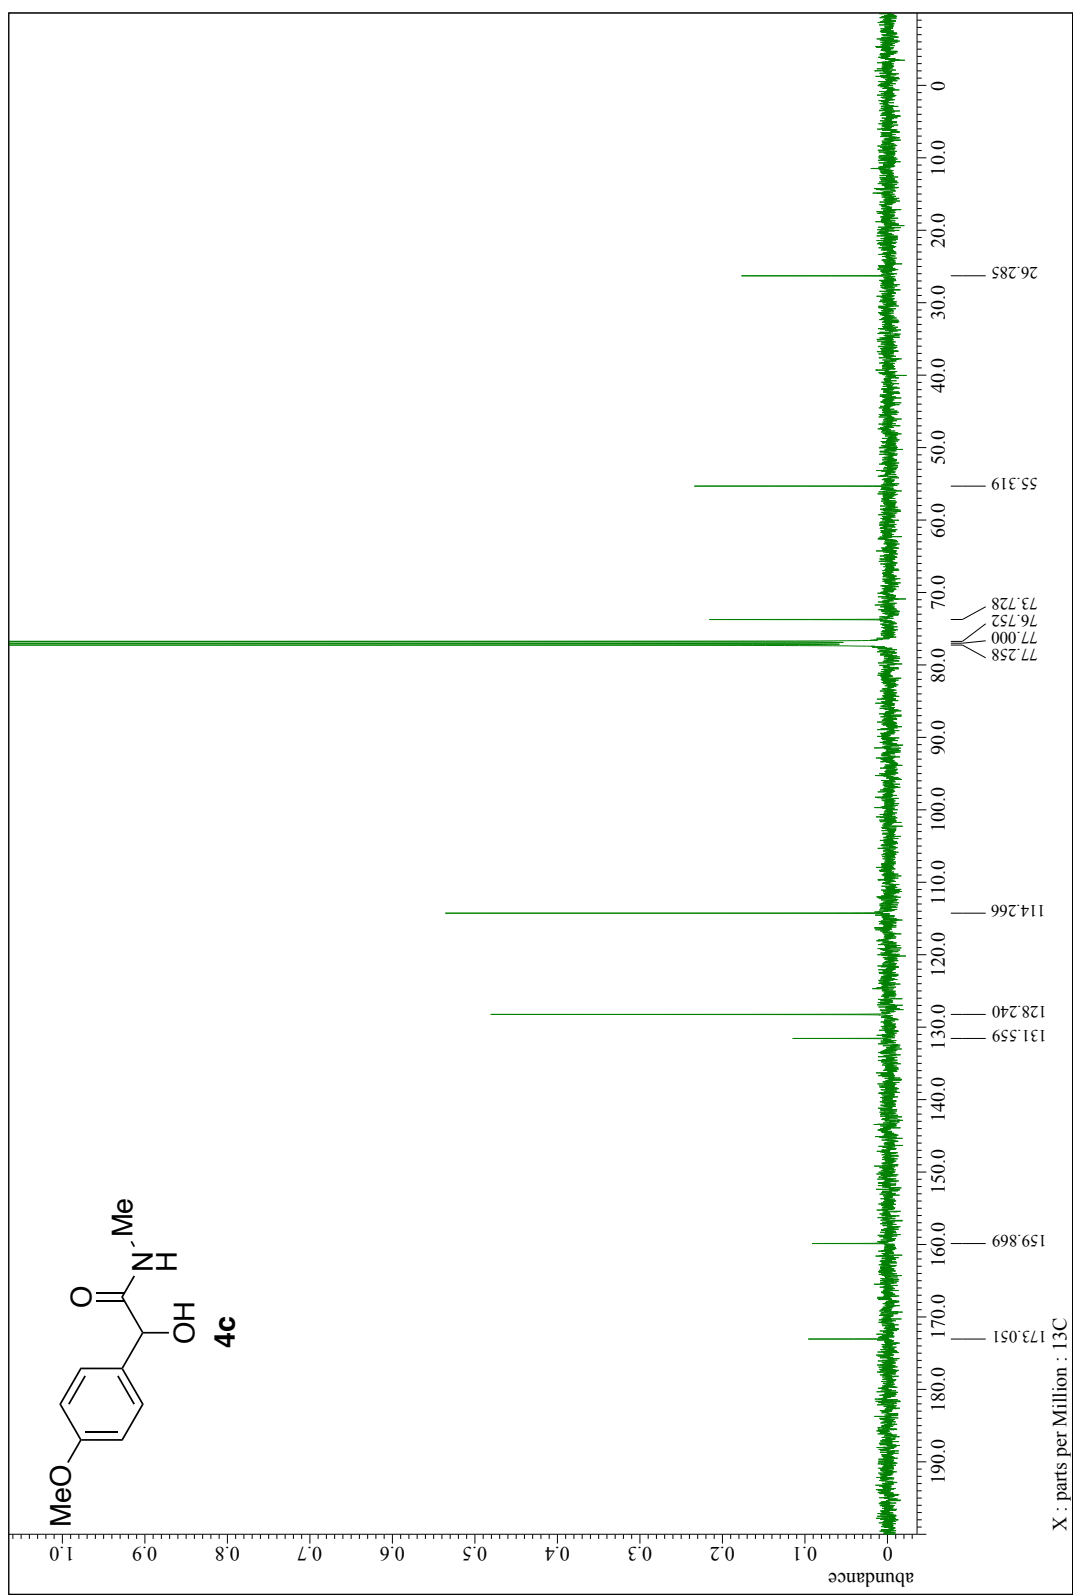

**<sup>1</sup>H NMR spectrum of 4d (500 MHz, CDCl<sub>3</sub>)**

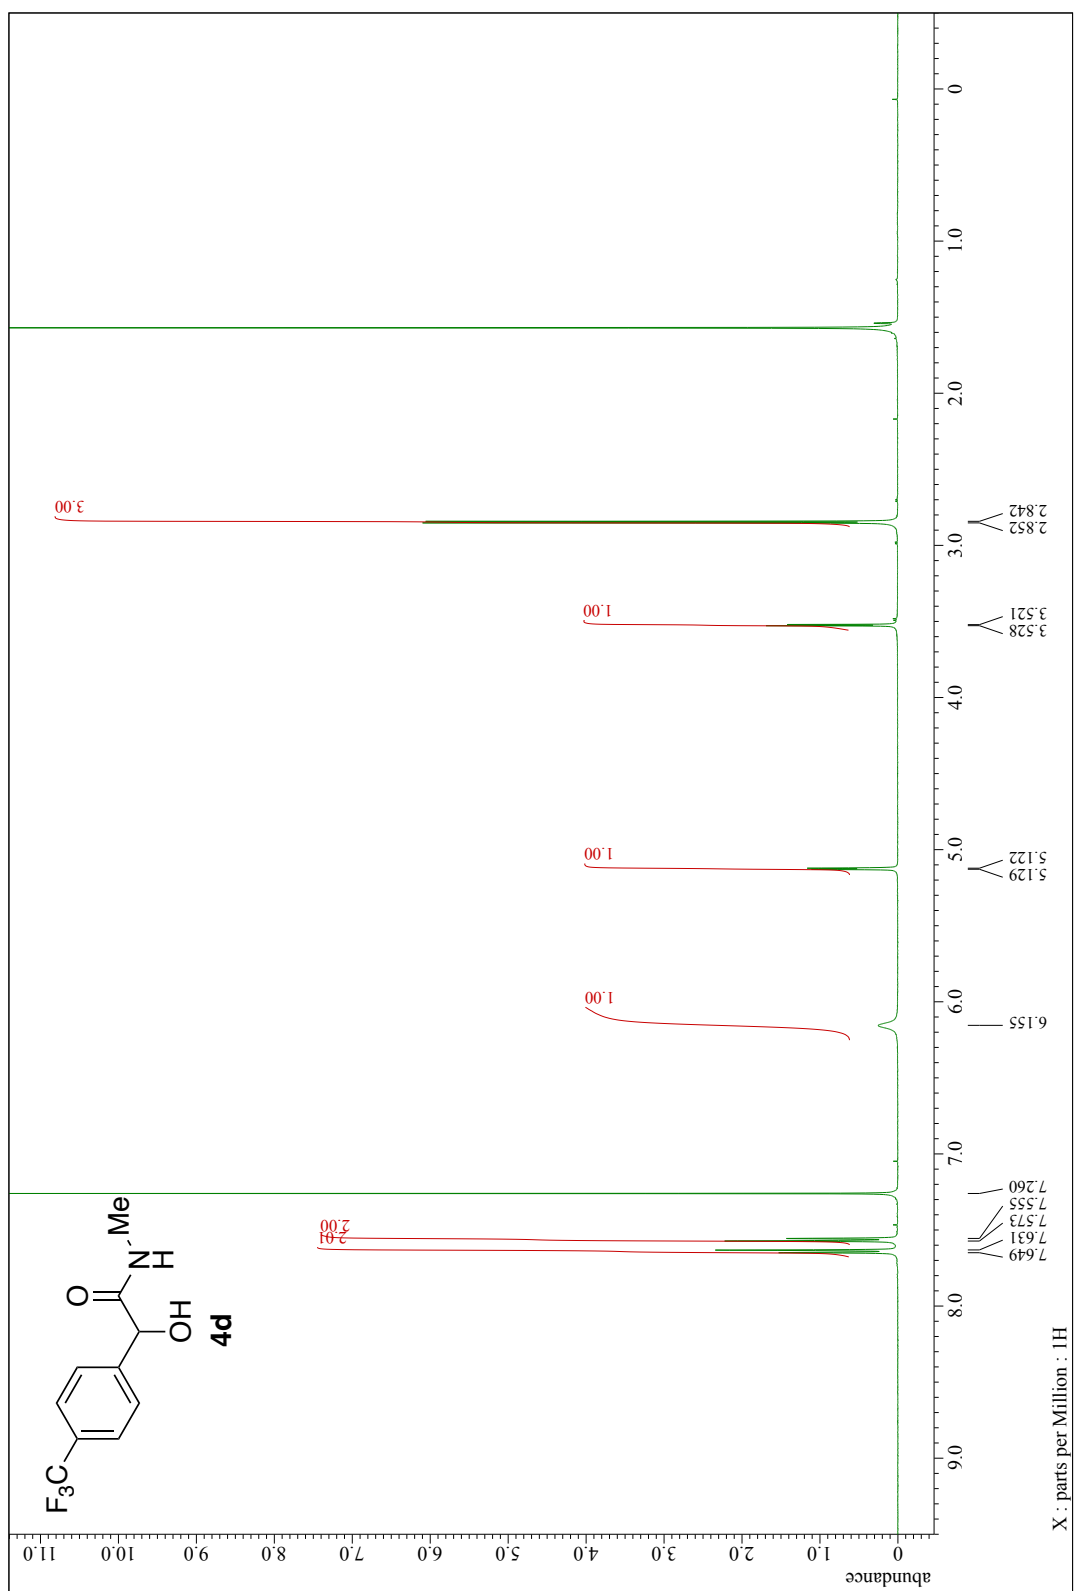

**$^{13}\text{C}$  NMR spectrum of 4d (126 MHz,  $\text{CDCl}_3$ )**

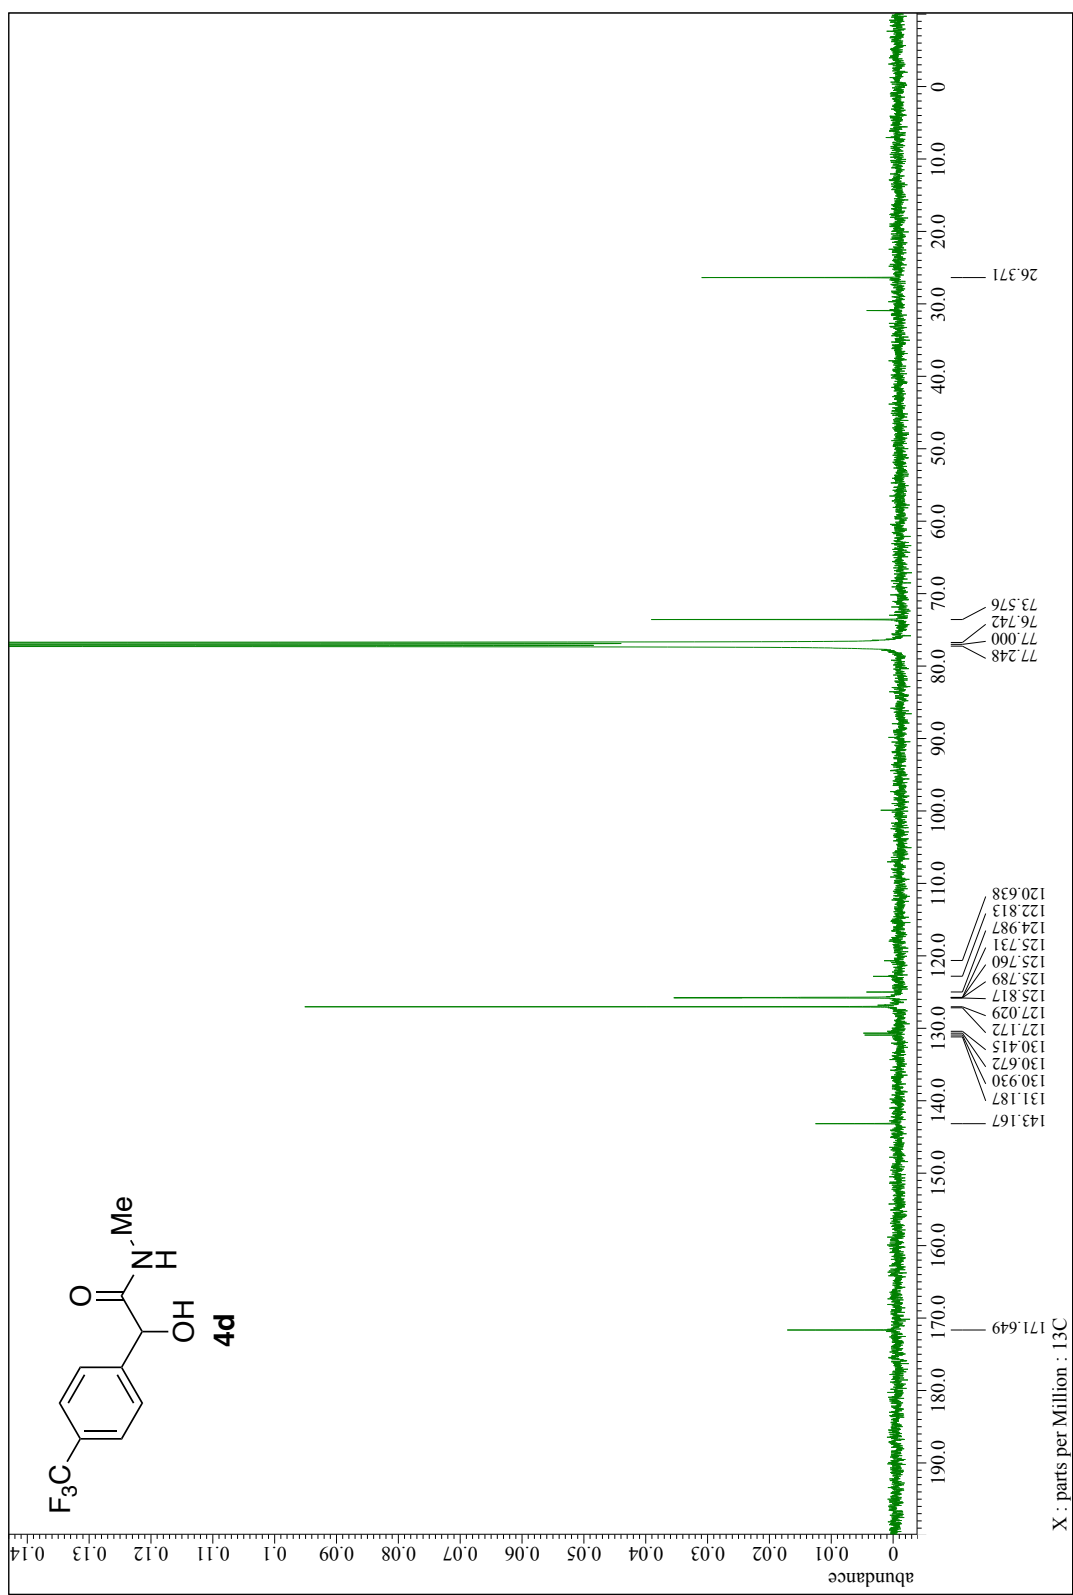

# <sup>1</sup>H NMR spectrum of 4e (500 MHz, CDCl<sub>3</sub>)

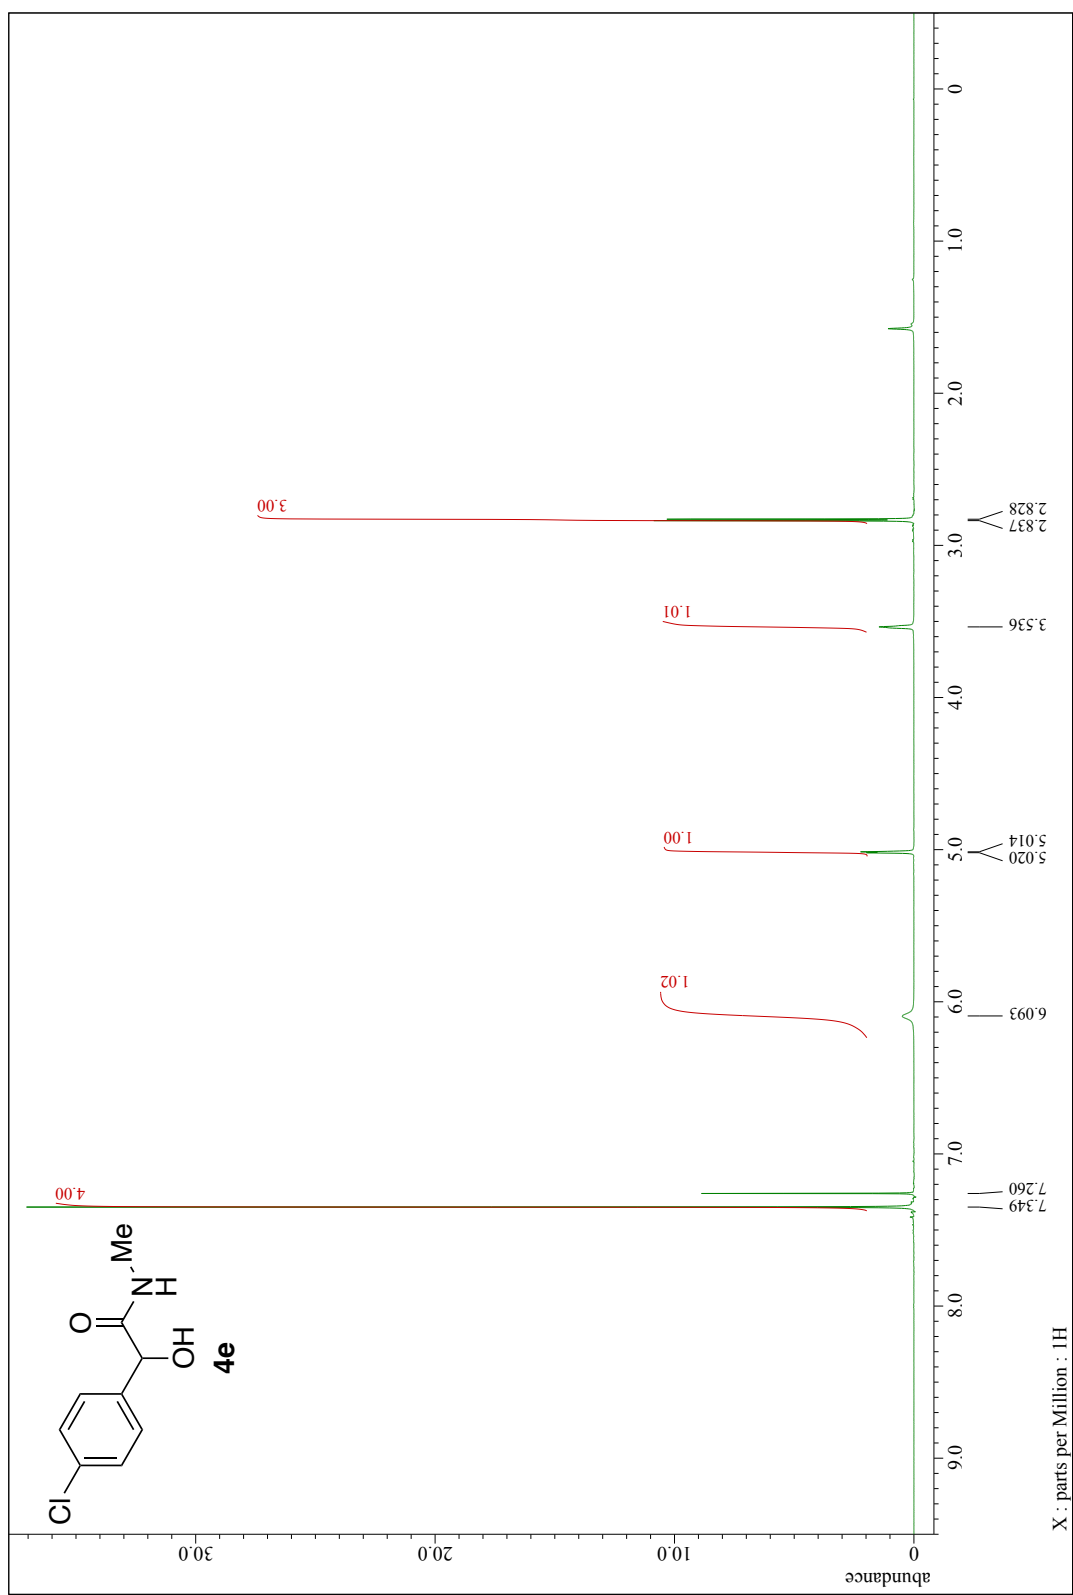

**$^{13}\text{C}$  NMR spectrum of 4e (126 MHz,  $\text{CDCl}_3$ )**

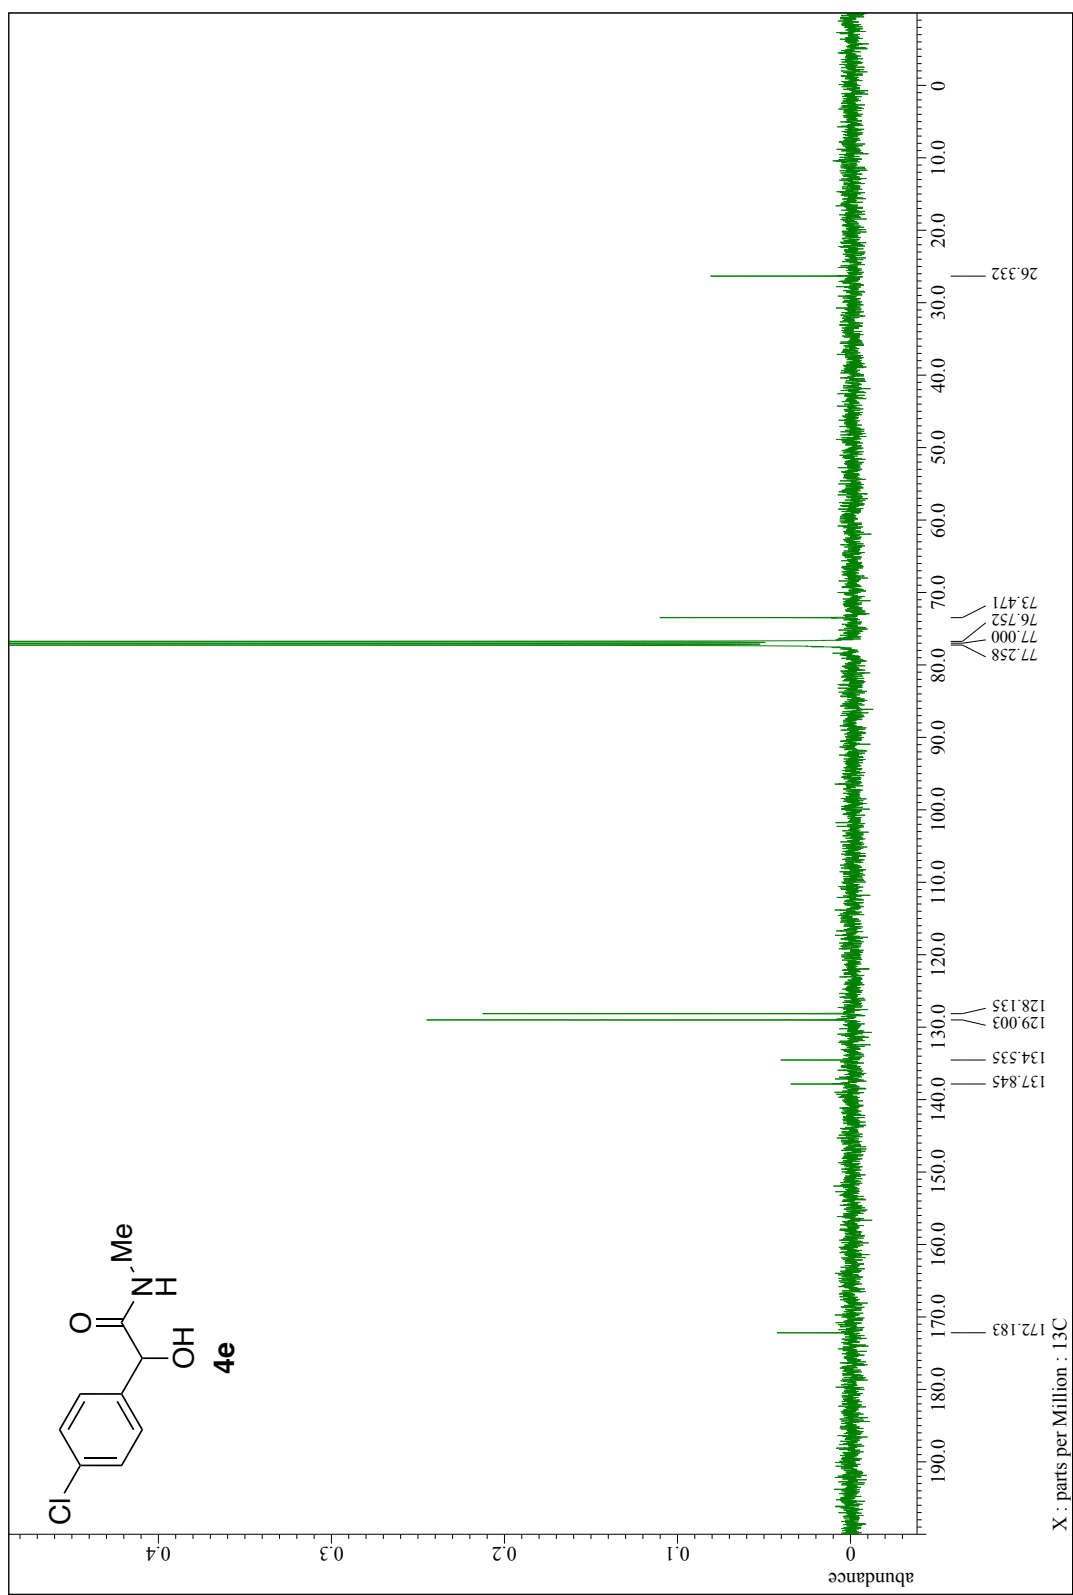

**<sup>1</sup>H NMR spectrum of 4f (500 MHz, CDCl<sub>3</sub>)**

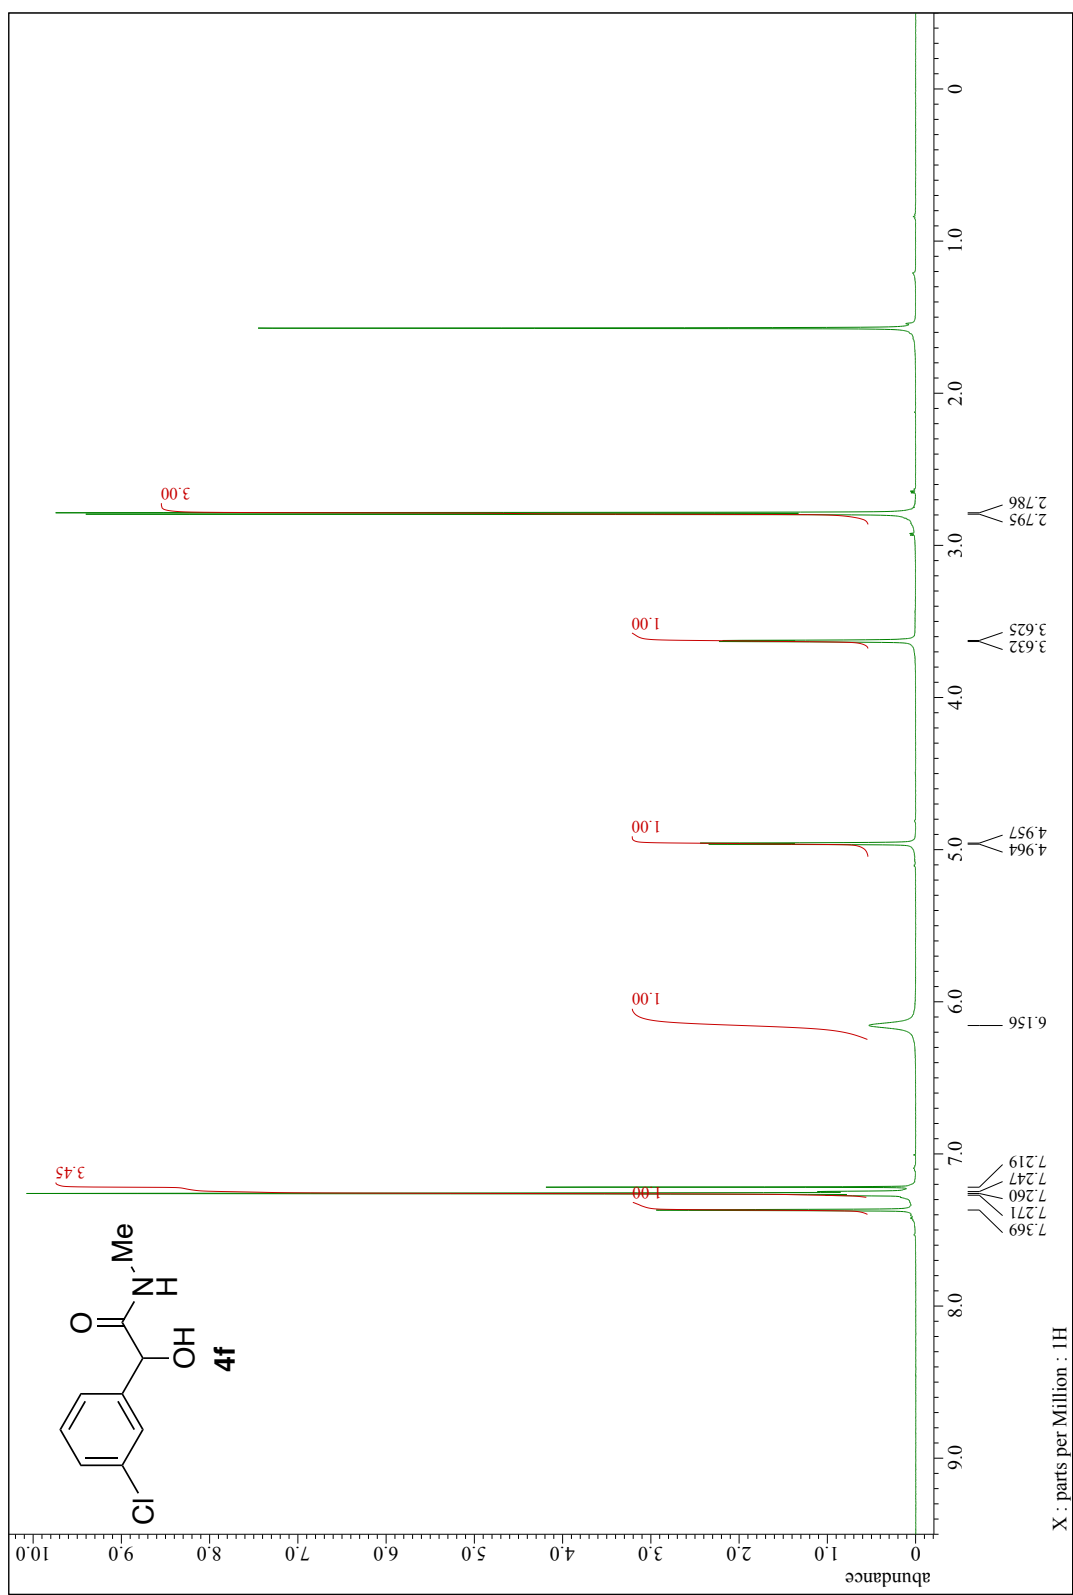

**<sup>13</sup>C NMR spectrum of 4f (126 MHz, CDCl<sub>3</sub>)**

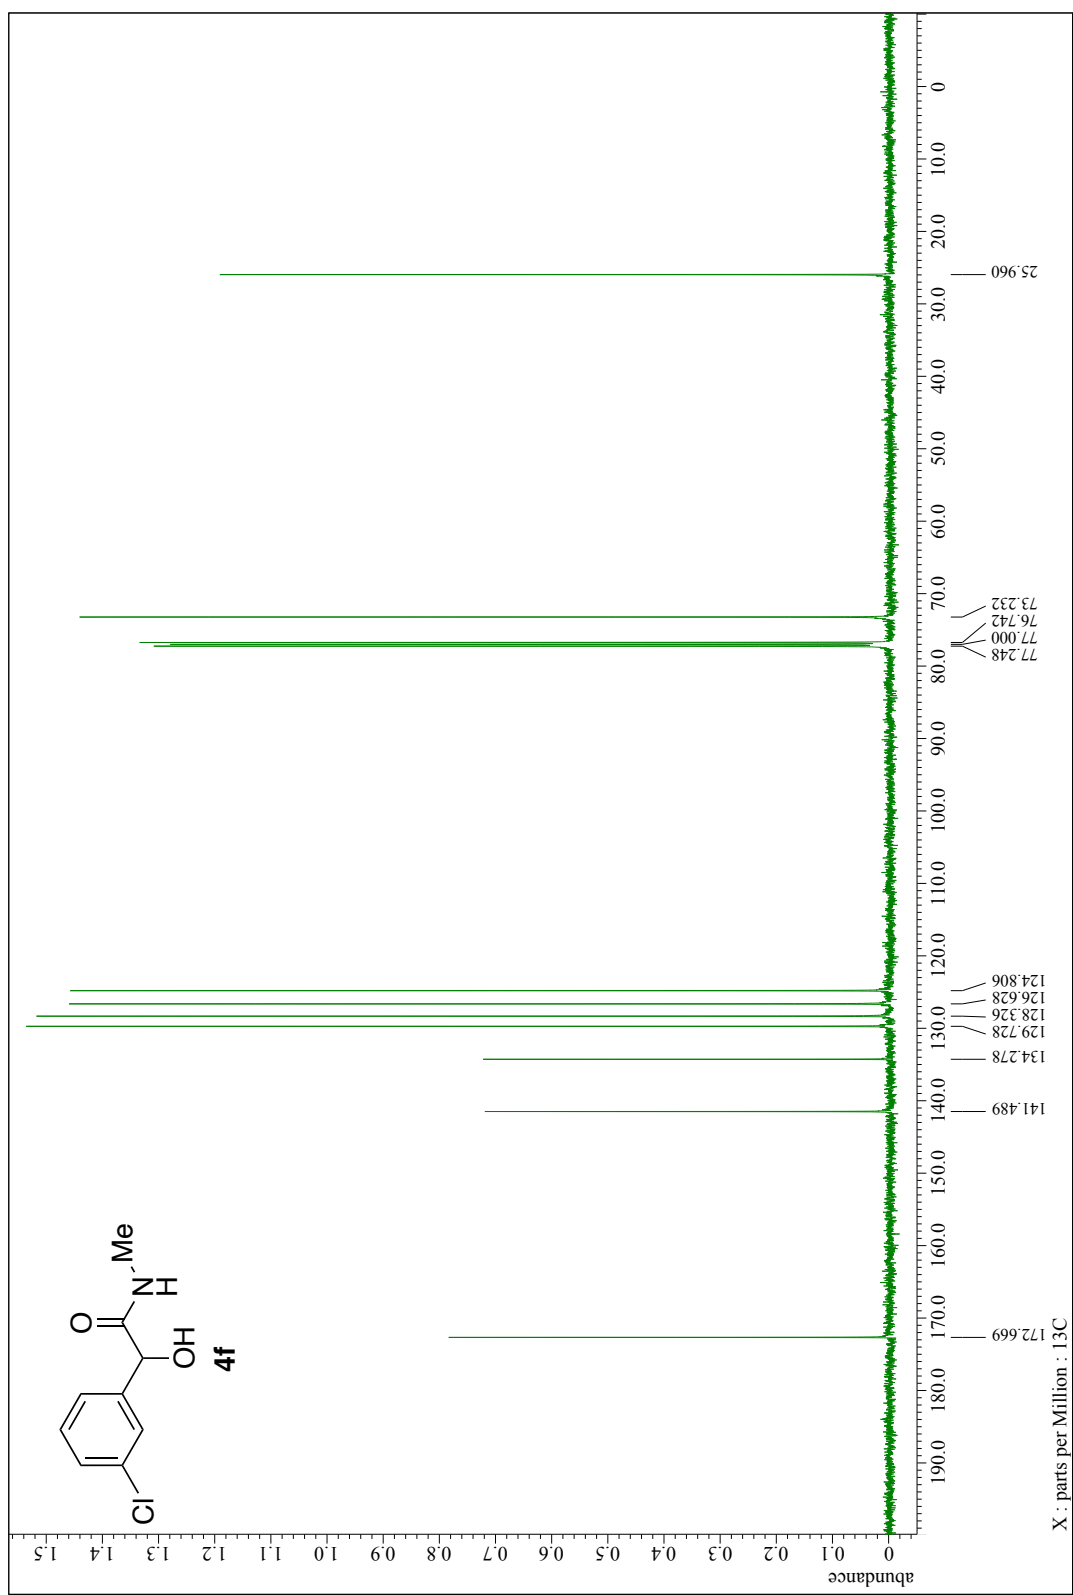





**<sup>13</sup>C NMR spectrum of 4g (126 MHz, CDCl<sub>3</sub>)**

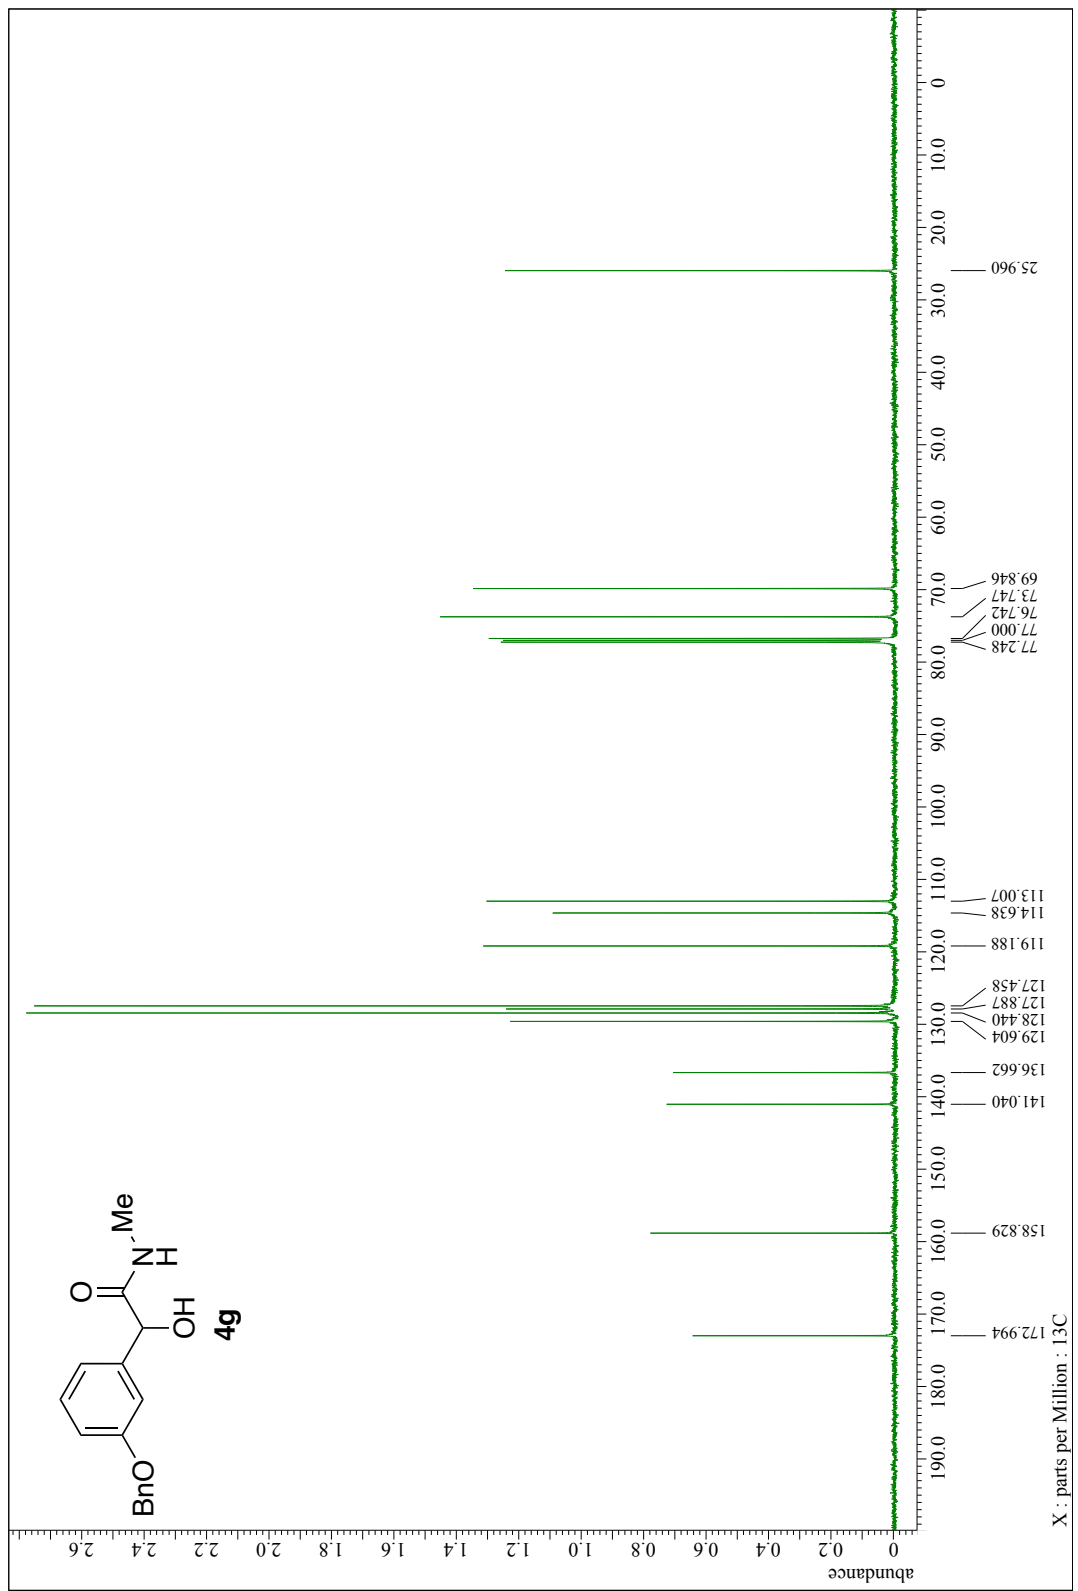

# <sup>1</sup>H NMR spectrum of 4h (500 MHz, CDCl<sub>3</sub>)

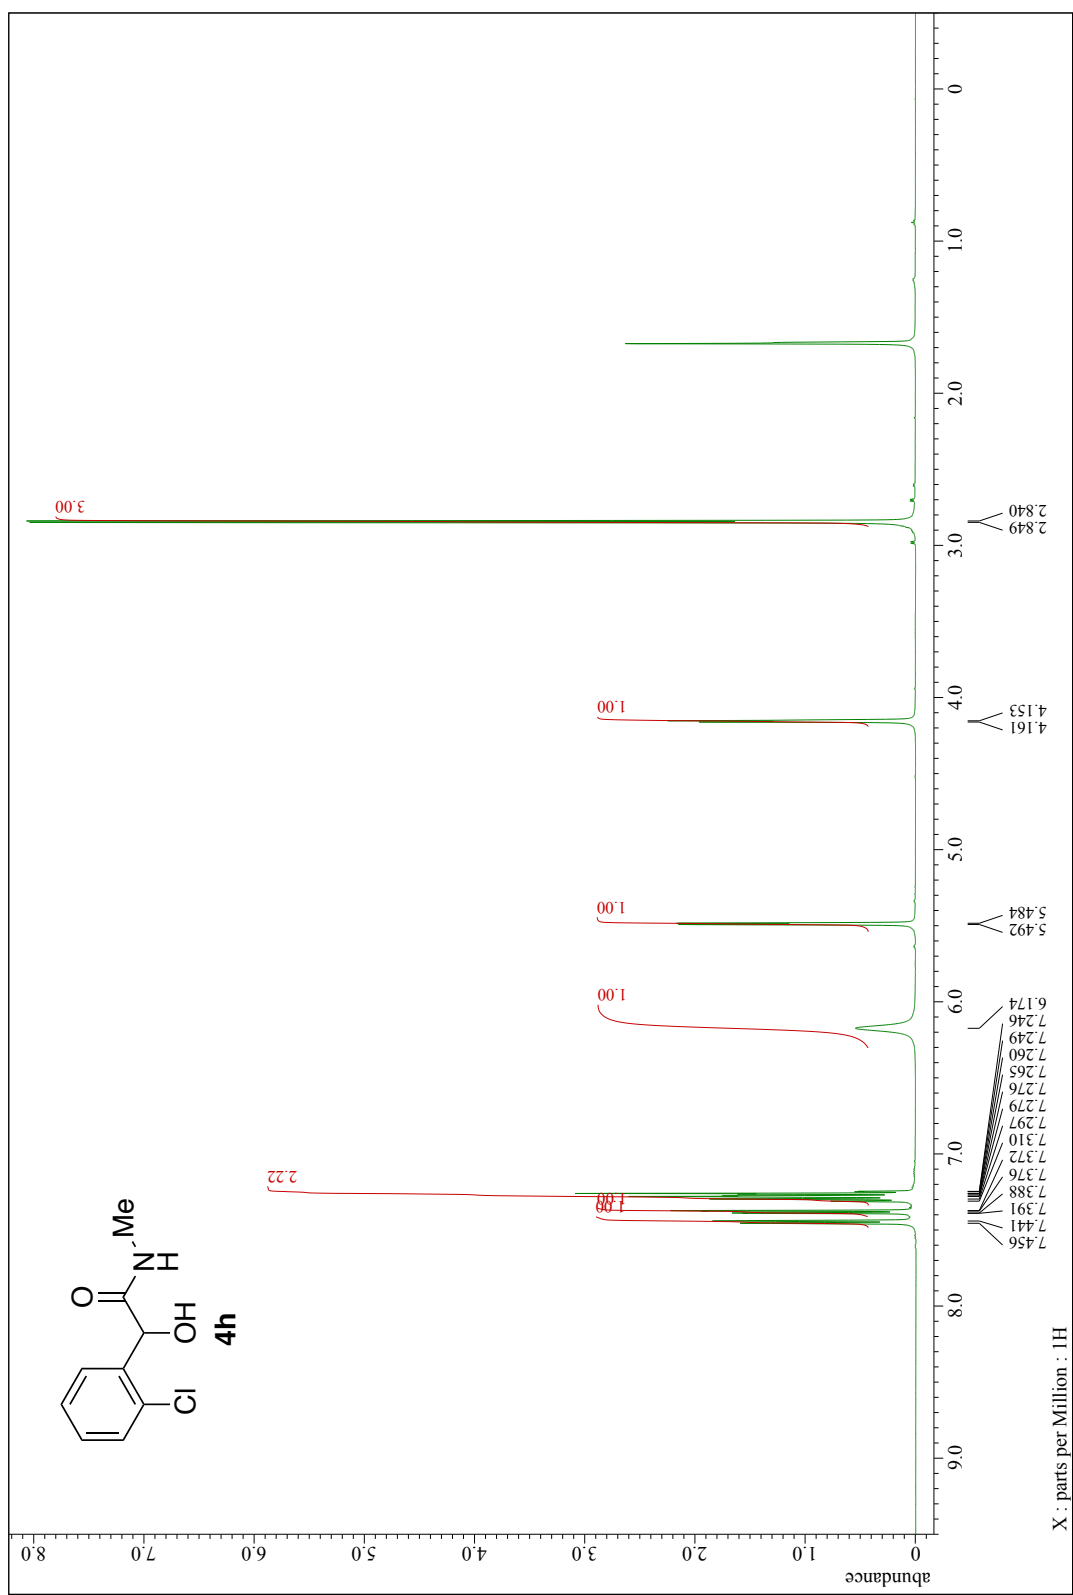

**$^{13}\text{C}$  NMR spectrum of 4h (126 MHz,  $\text{CDCl}_3$ )**

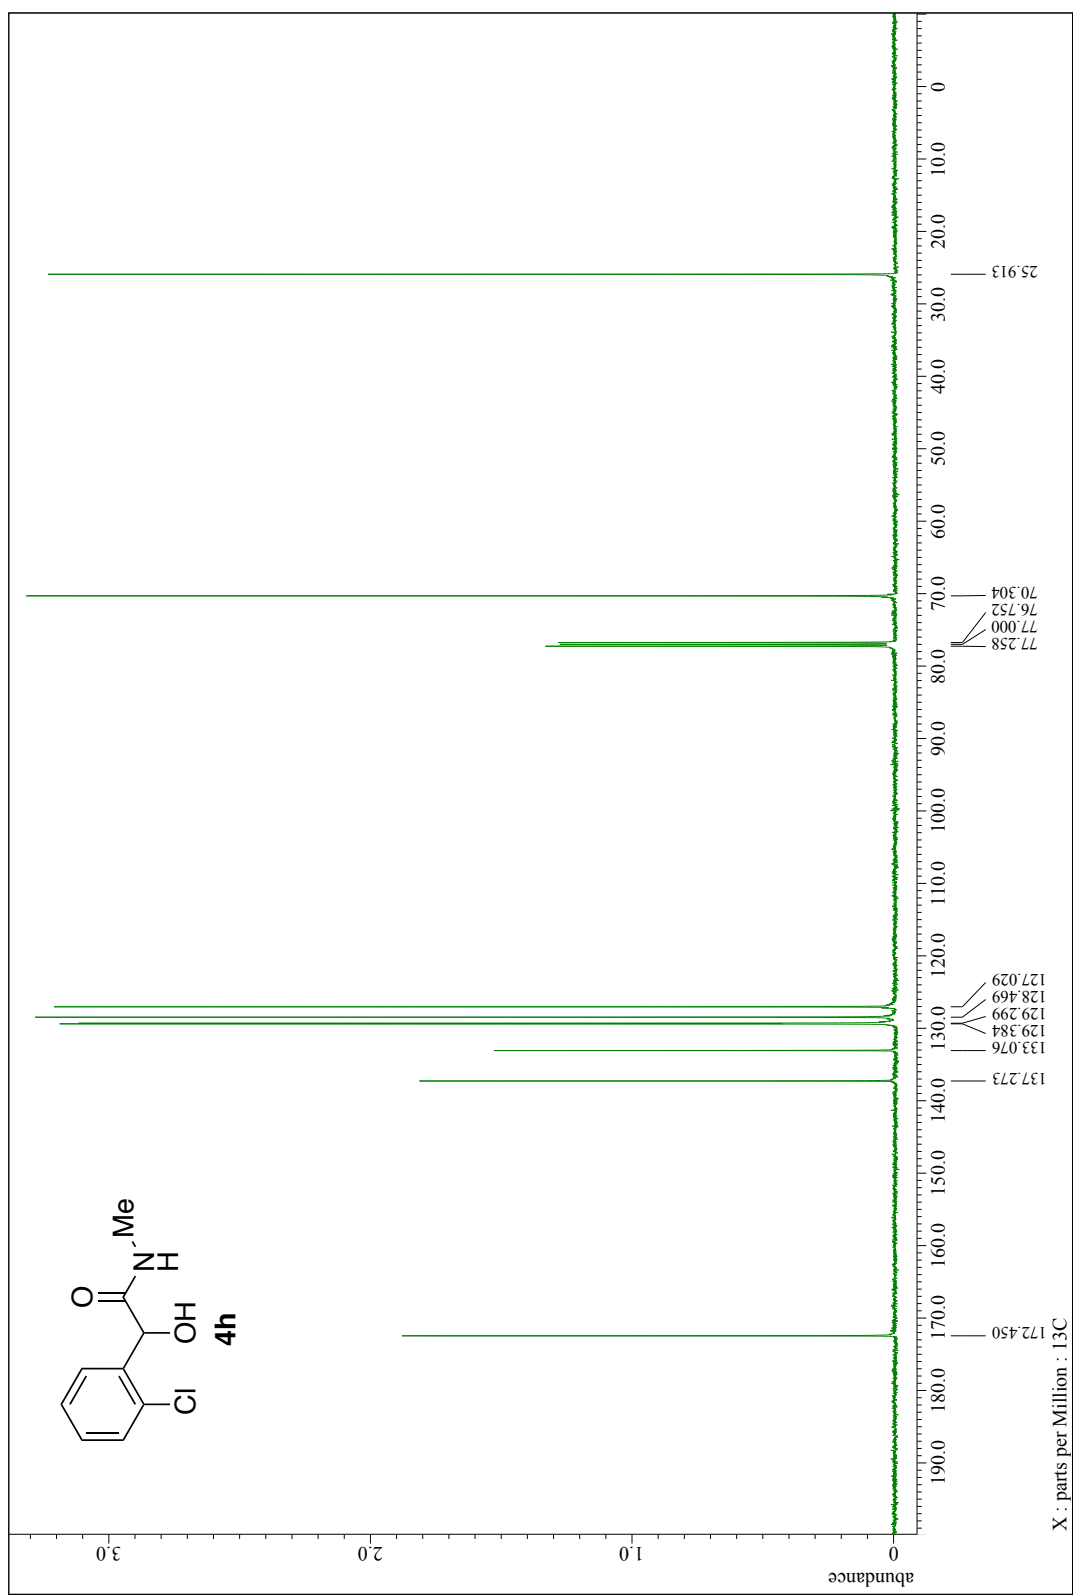

**<sup>1</sup>H NMR spectrum of 4i (500 MHz, CDCl<sub>3</sub>)**

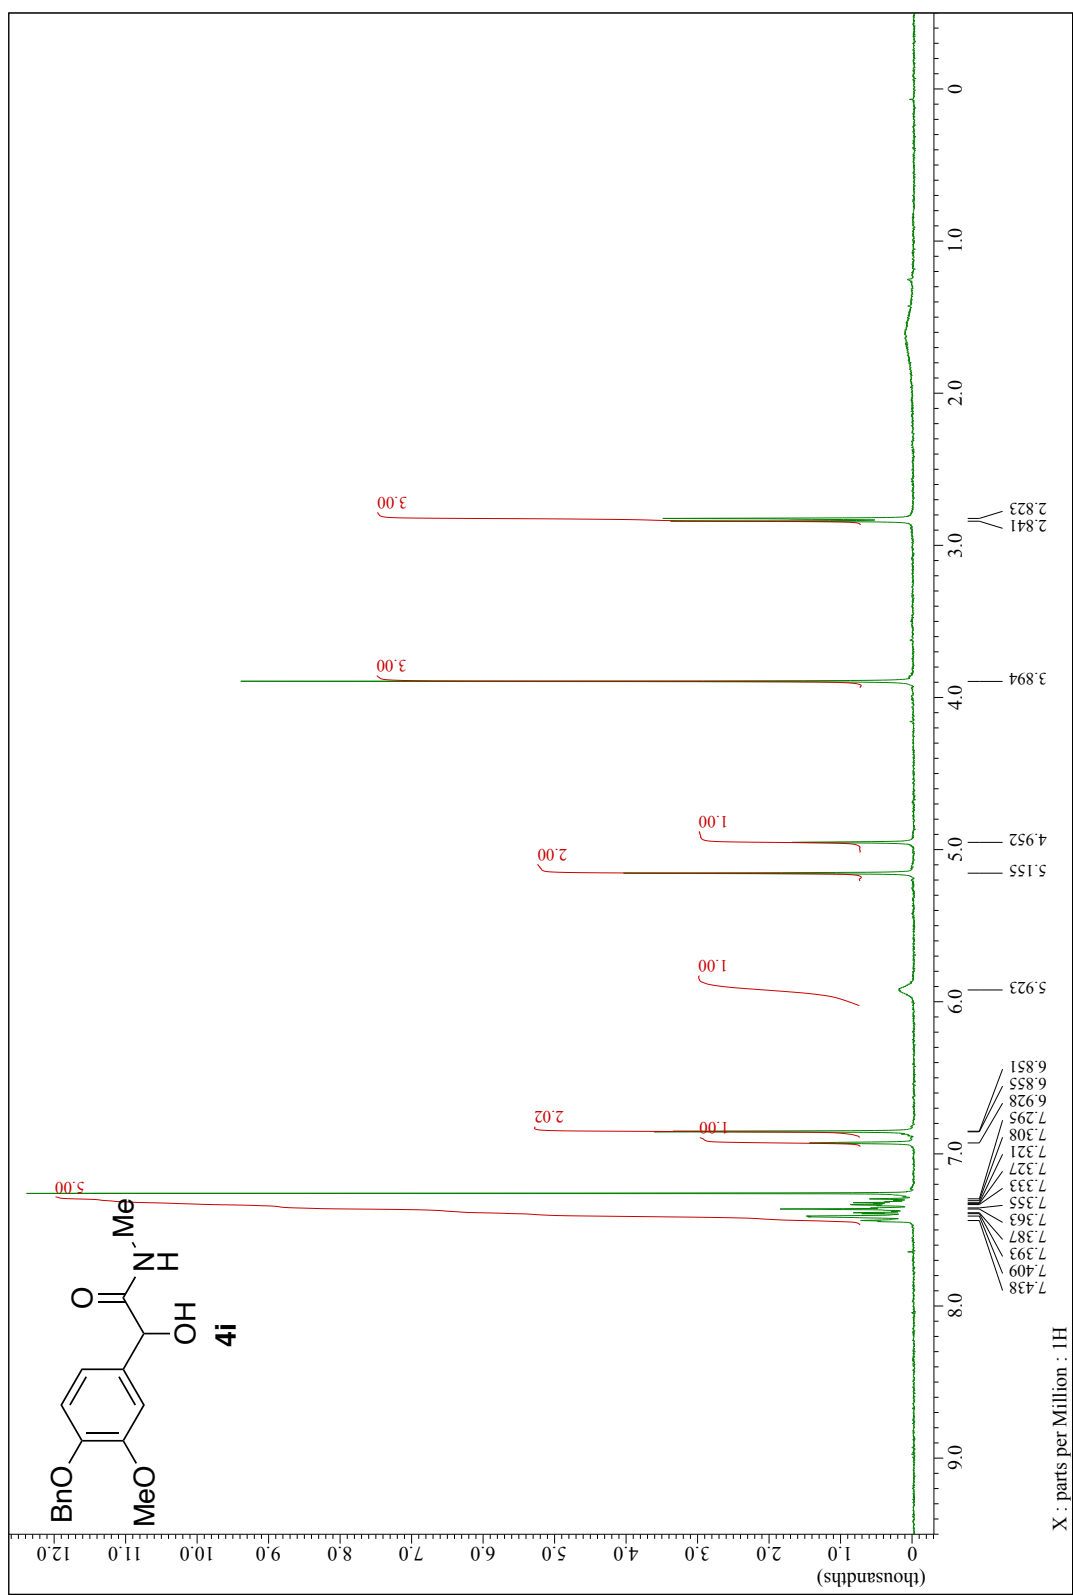

**$^{13}\text{C}$  NMR spectrum of 4i (126 MHz,  $\text{CDCl}_3$ )**

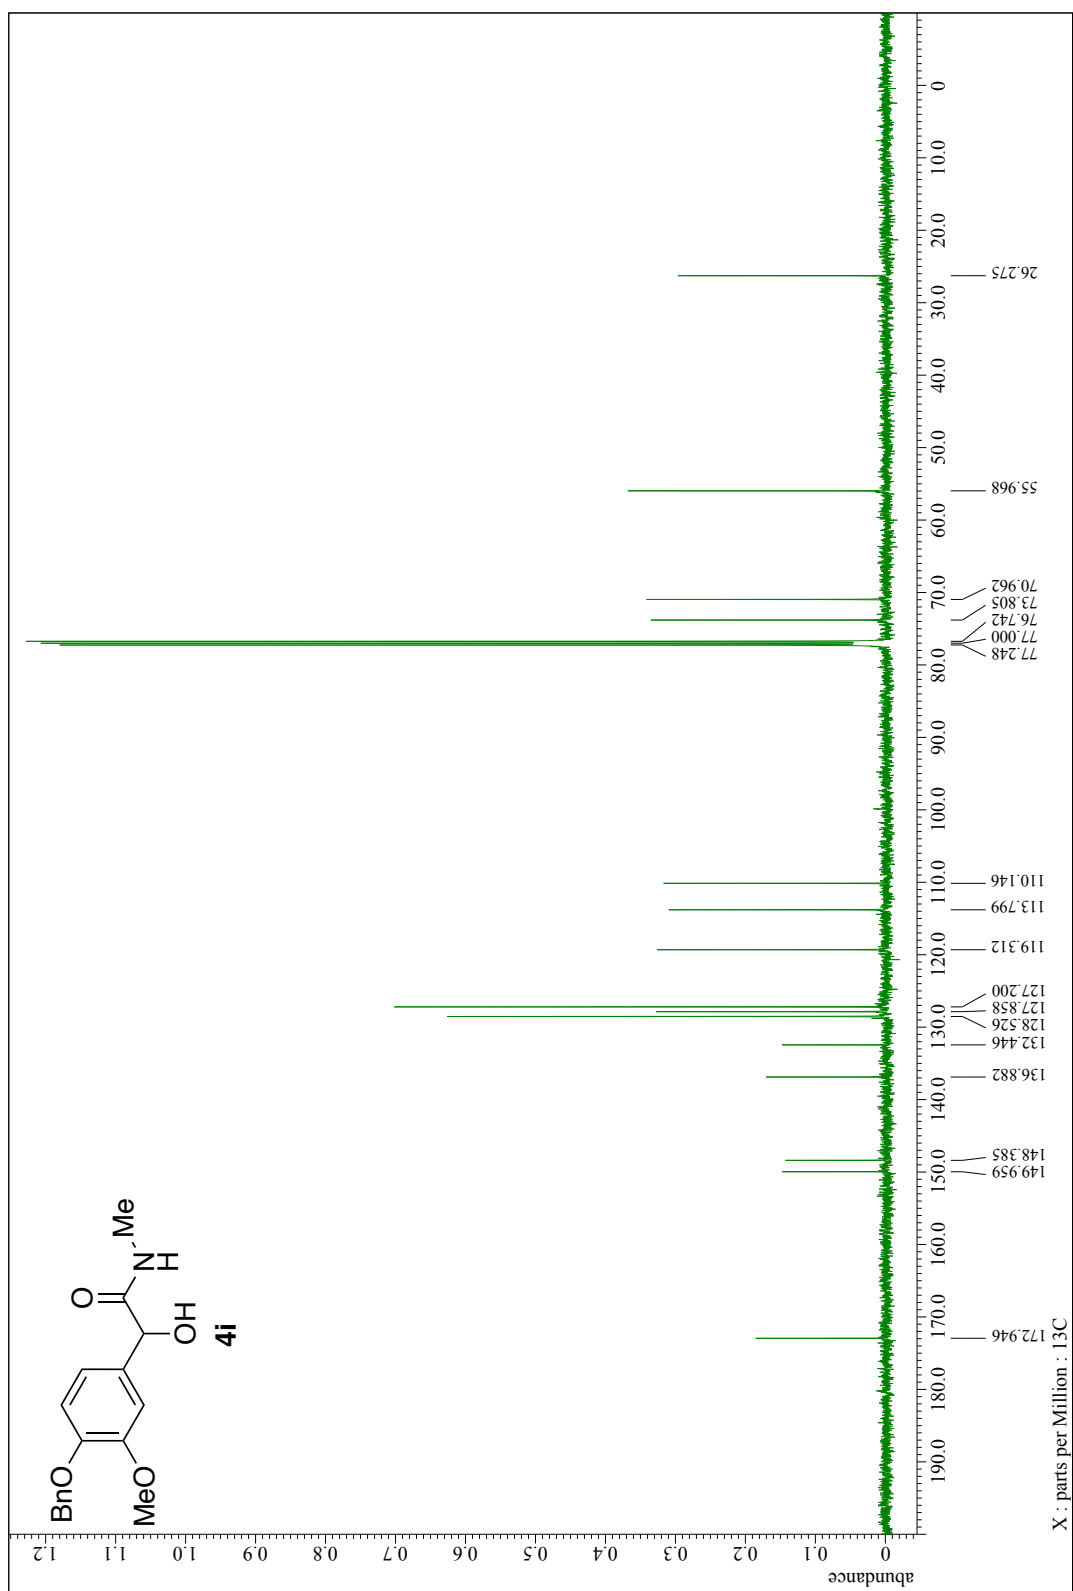

# <sup>1</sup>H NMR spectrum of 4j (500 MHz, CDCl<sub>3</sub>)

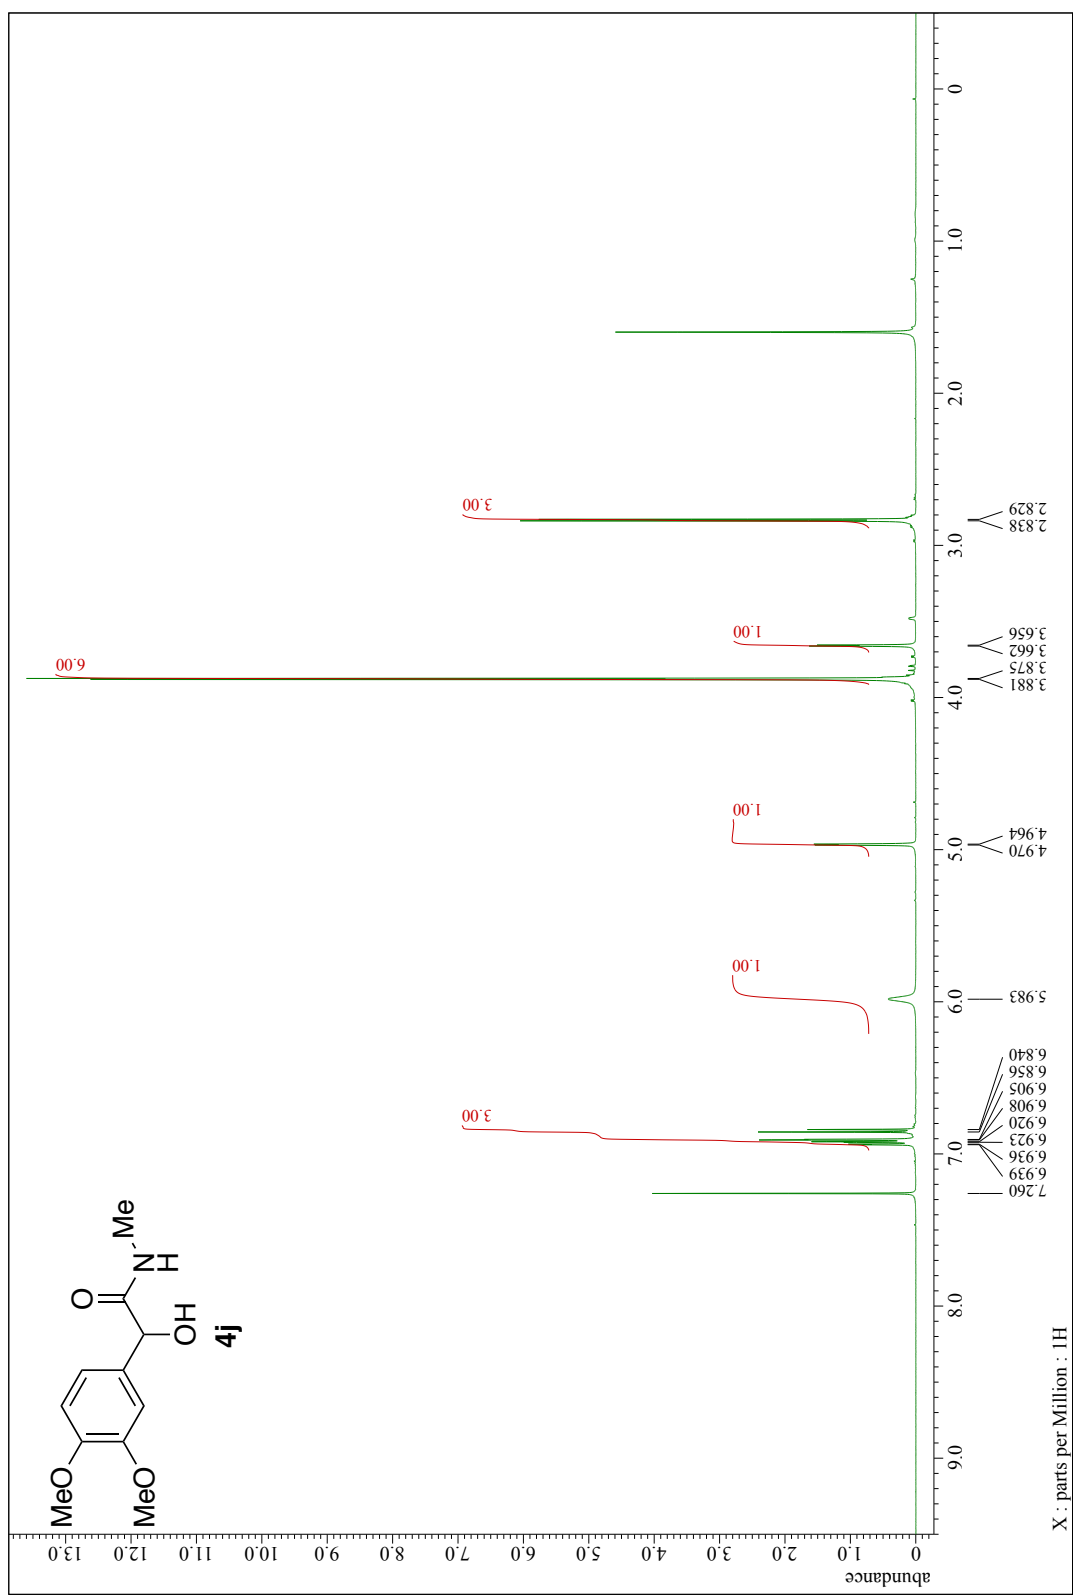

**<sup>13</sup>C NMR spectrum of 4j (126 MHz, CDCl<sub>3</sub>)**

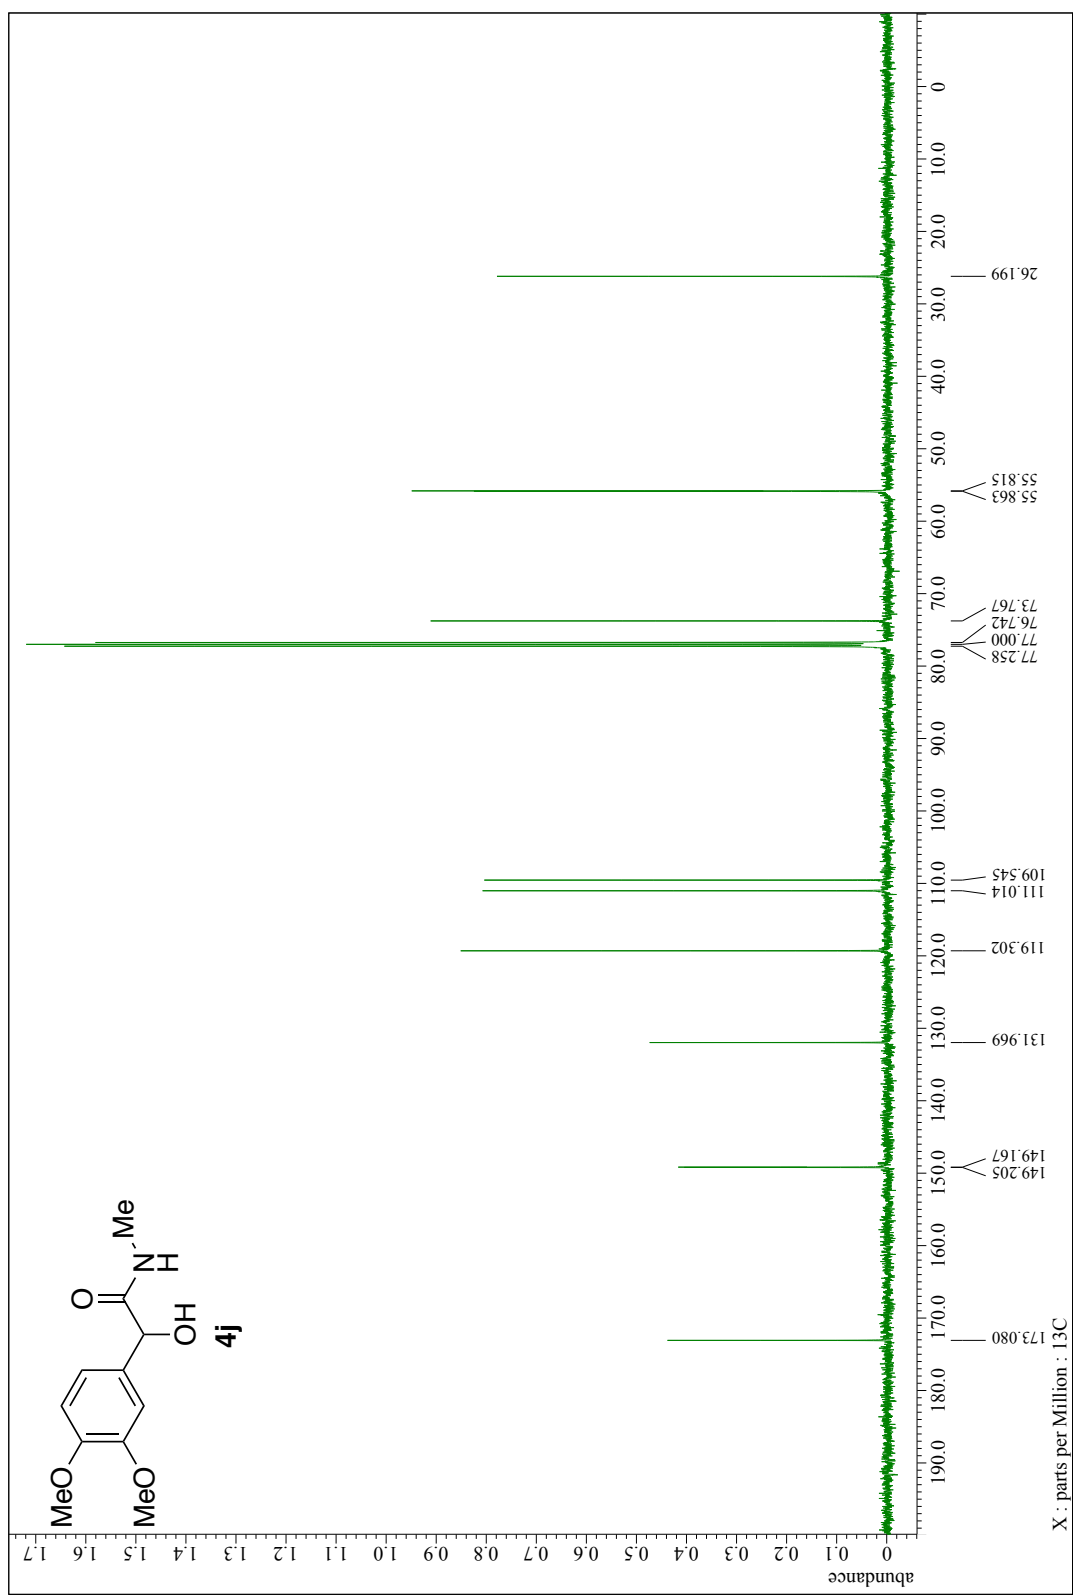





**$^{13}\text{C}$  NMR spectrum of 4k (126 MHz,  $\text{CDCl}_3$ )**

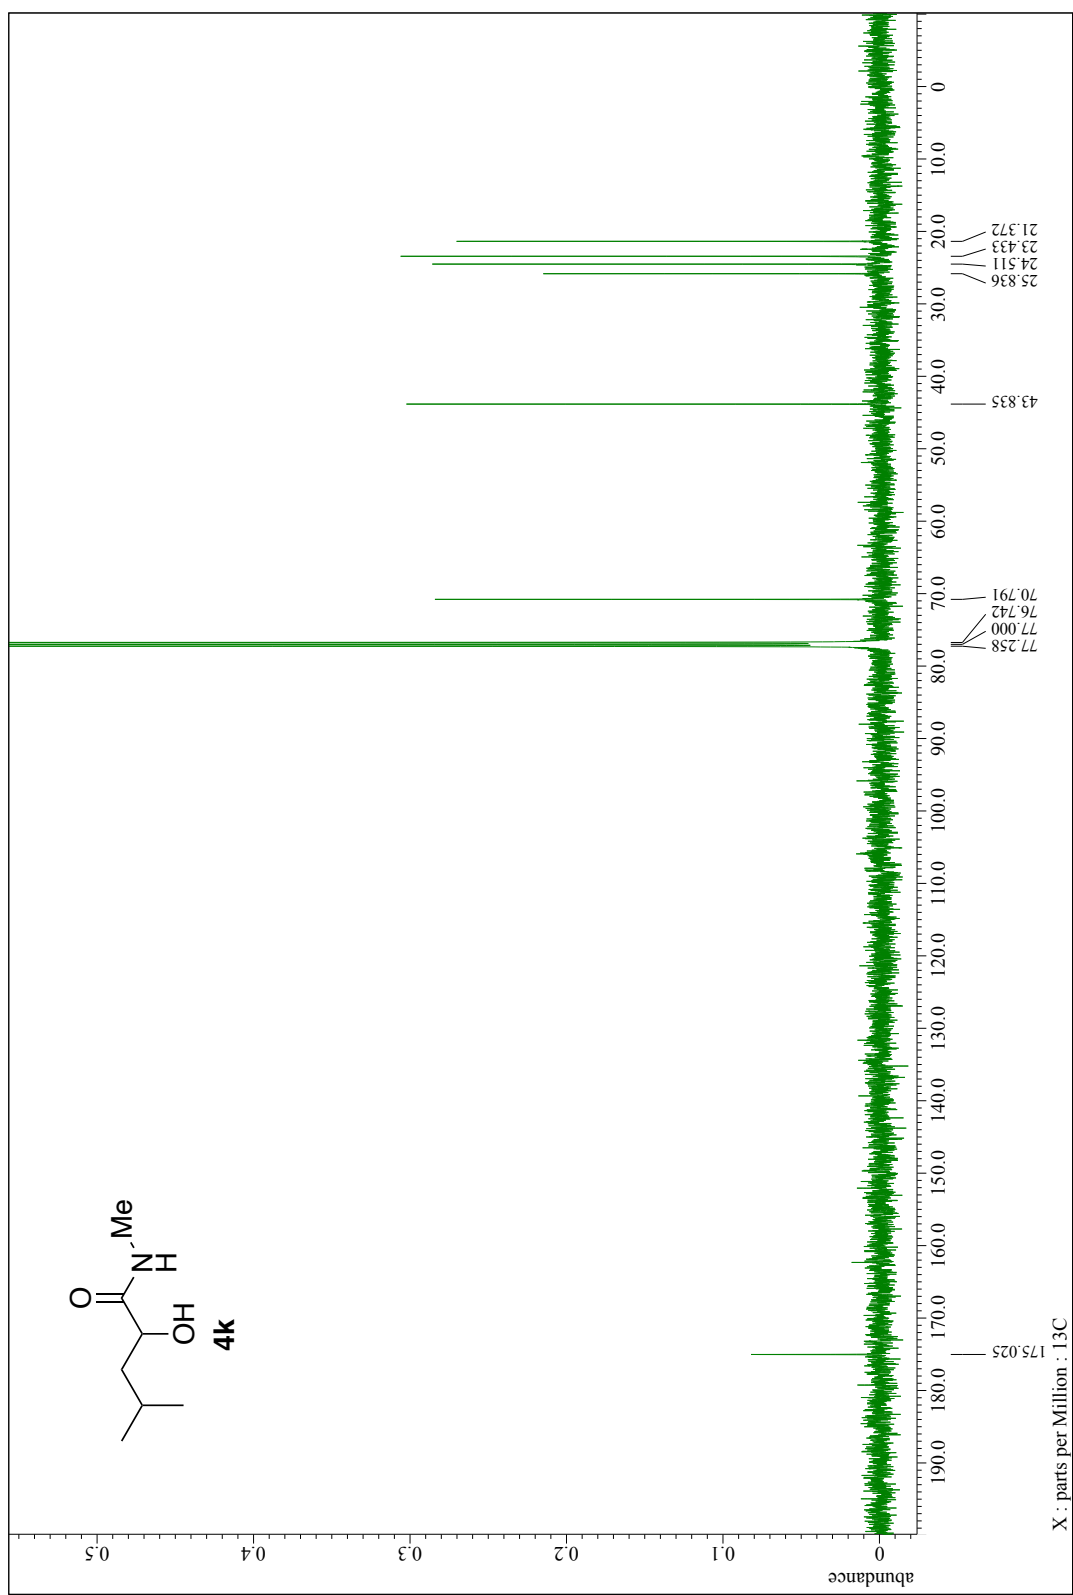

**<sup>1</sup>H NMR spectrum of 4I (500 MHz, CDCl<sub>3</sub>)**

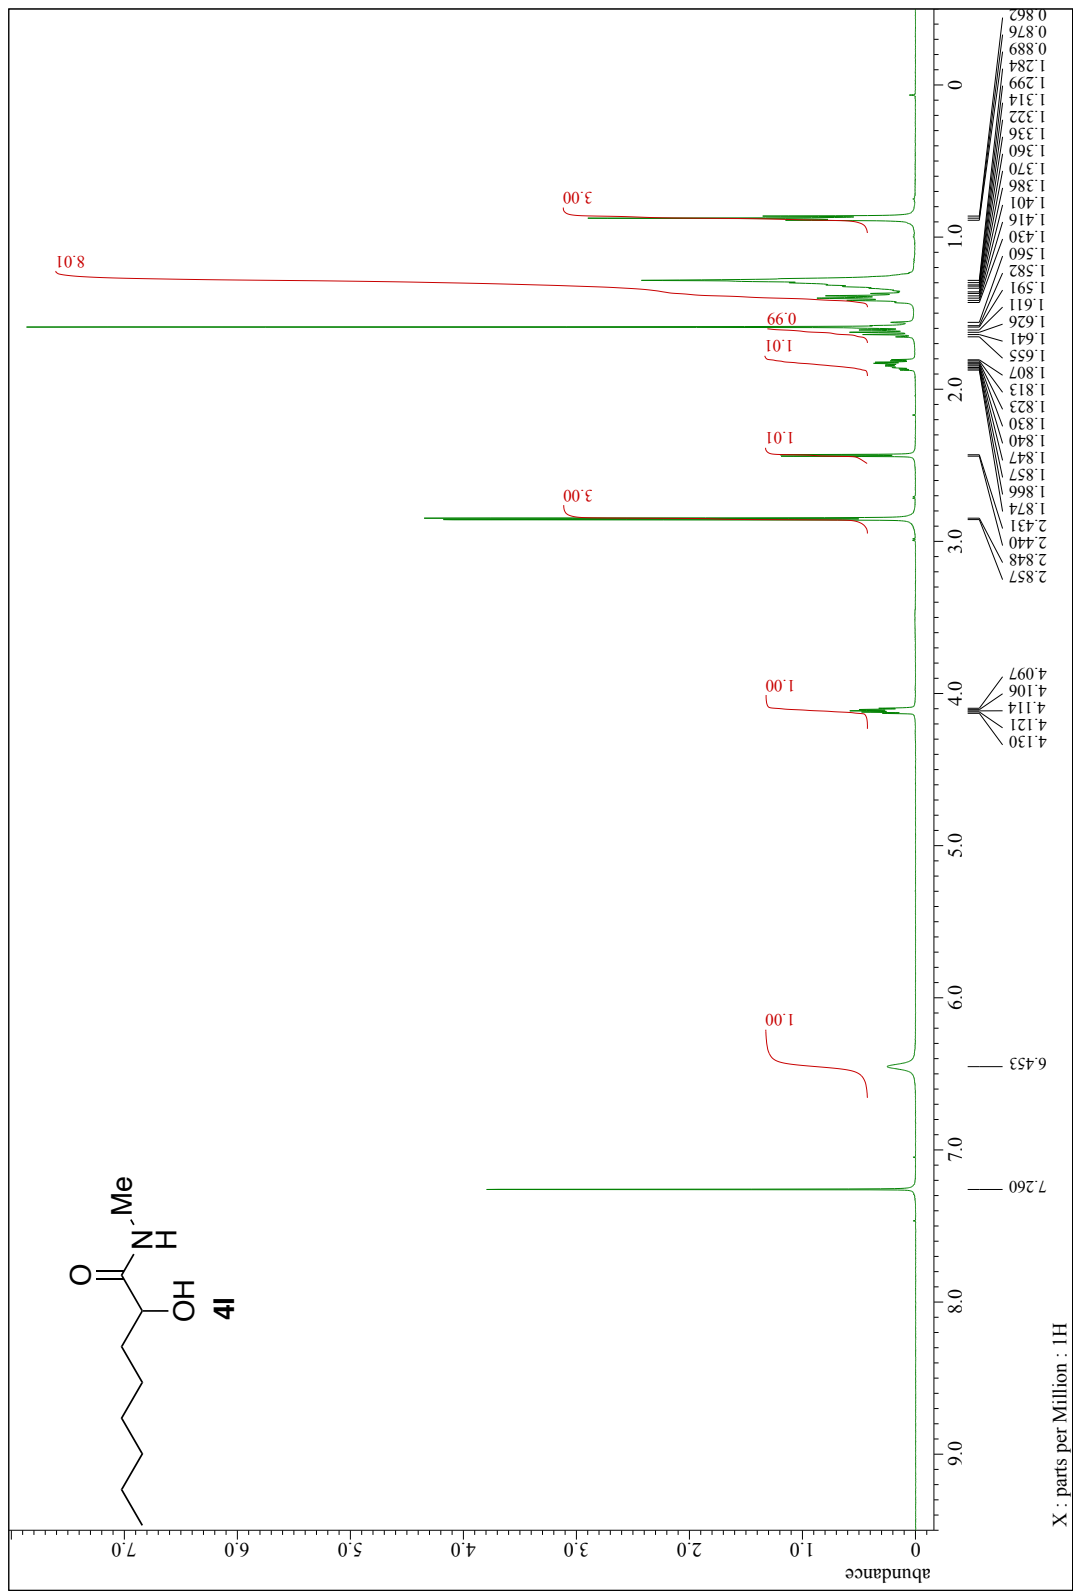

**$^{13}\text{C}$  NMR spectrum of 4I (126 MHz,  $\text{CDCl}_3$ )**

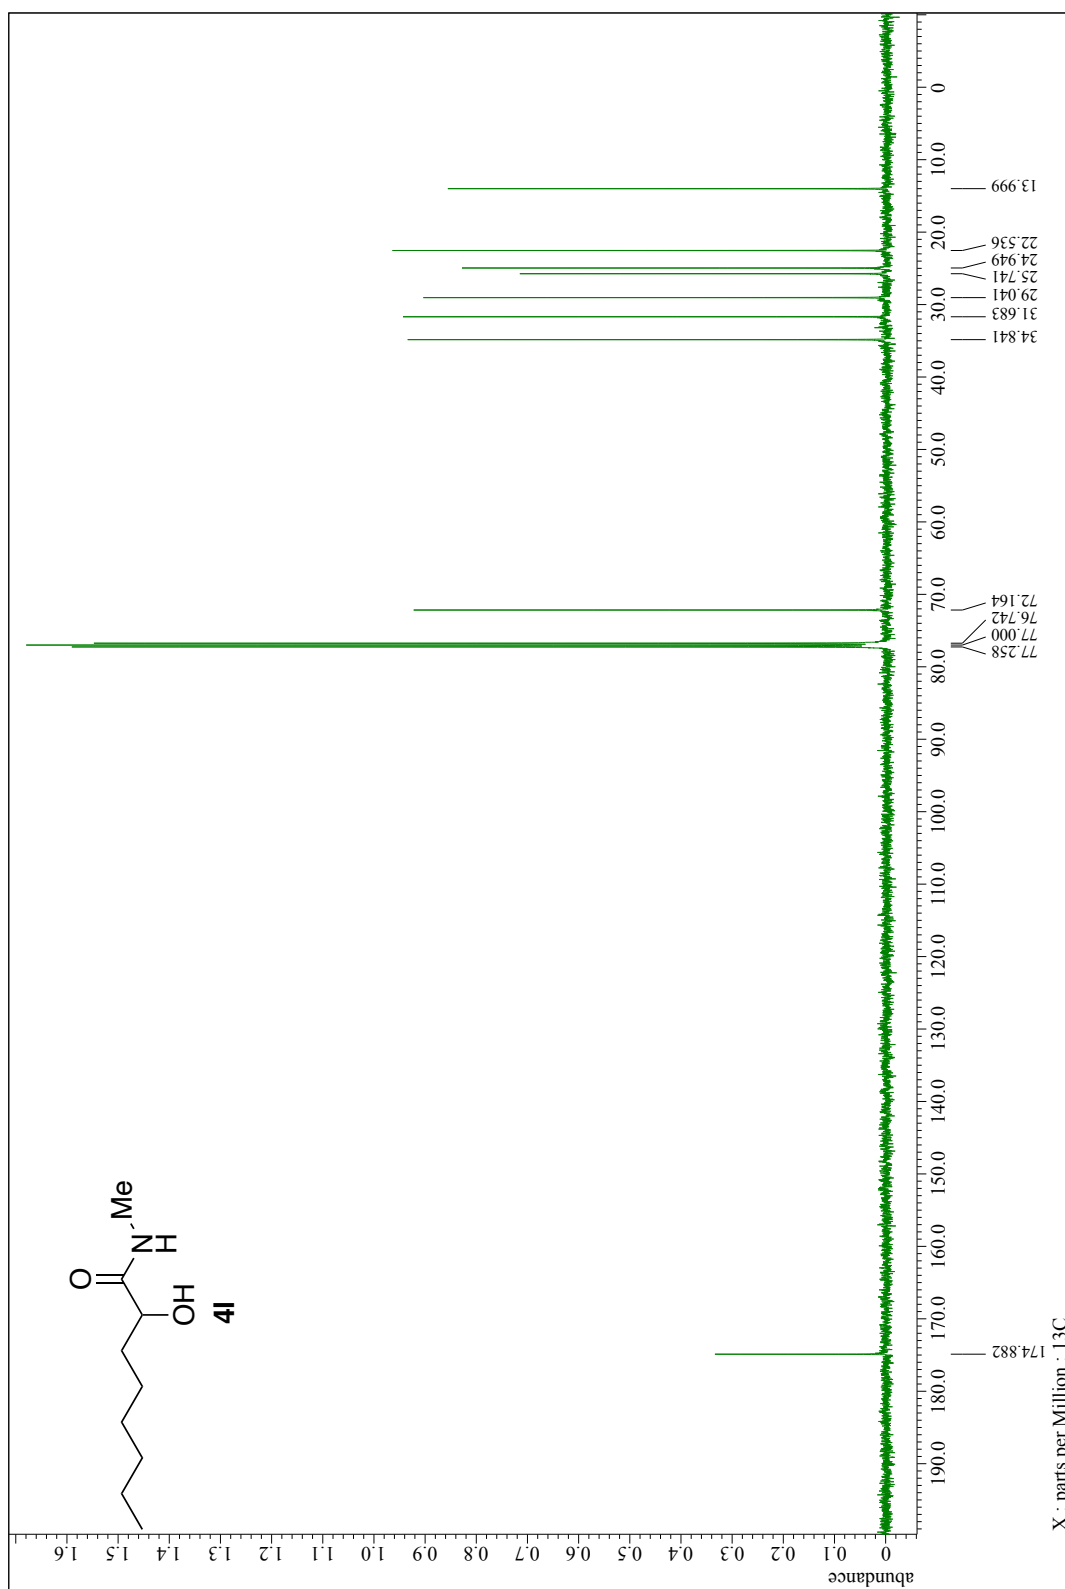

# <sup>1</sup>H NMR spectrum of 4m (500 MHz, CDCl<sub>3</sub>)

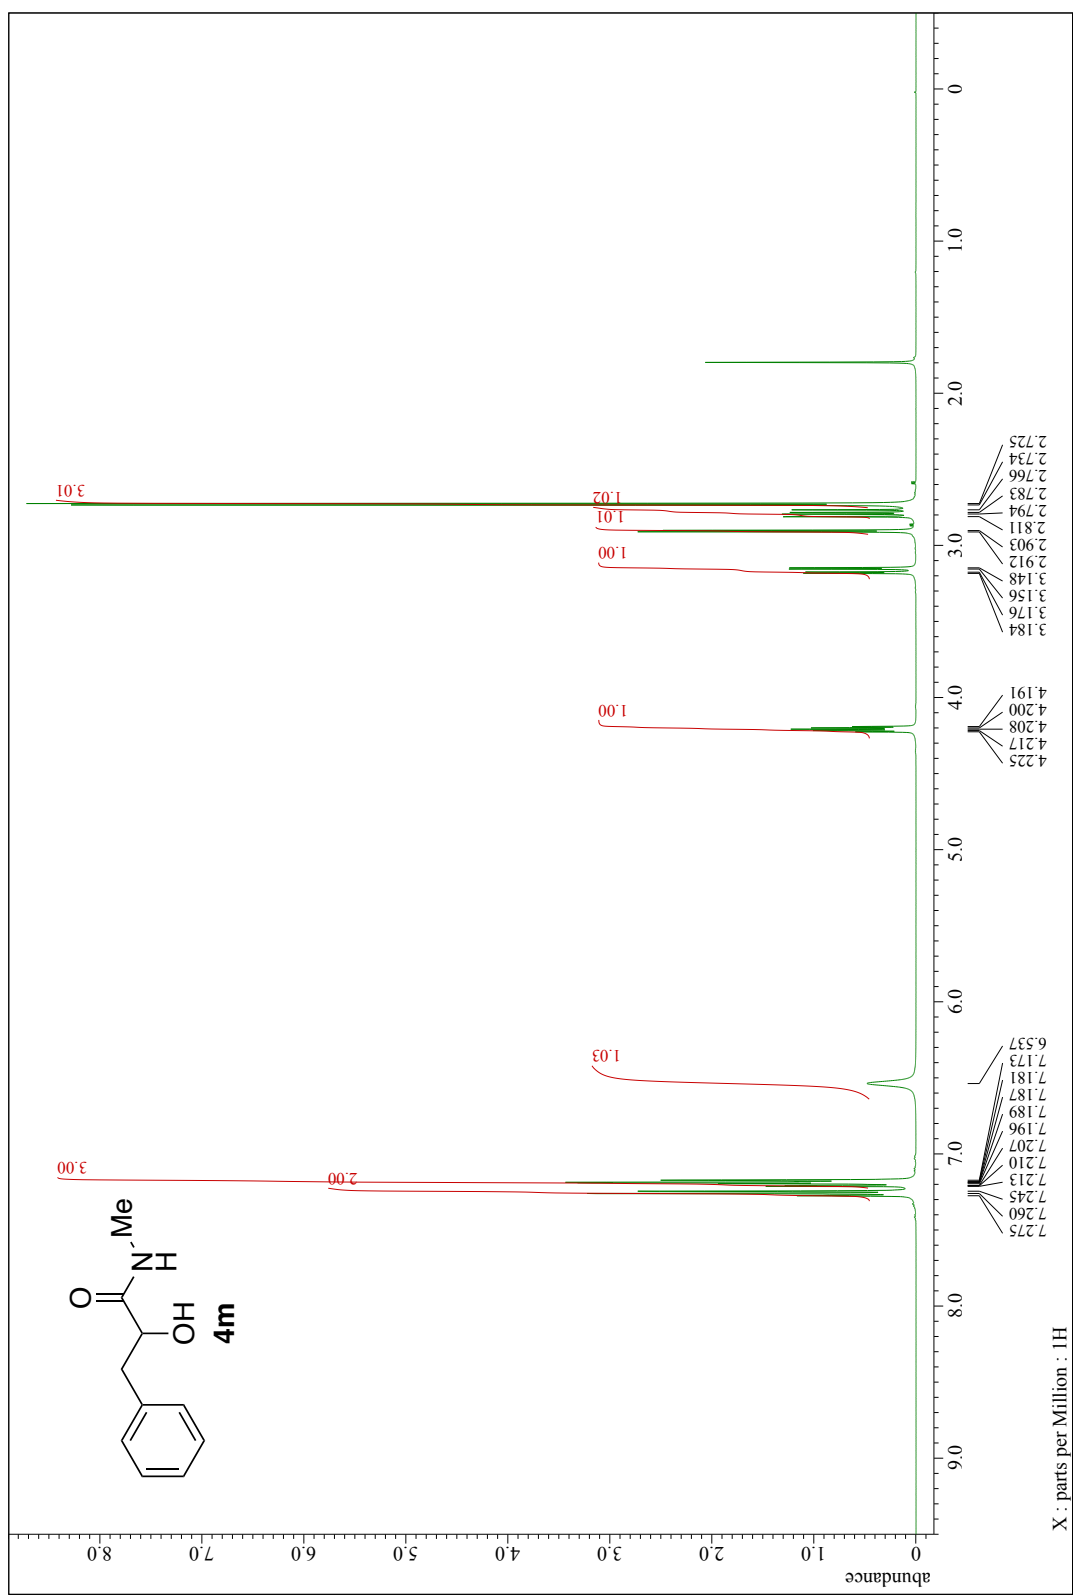

**$^{13}\text{C}$  NMR spectrum of 4m (126 MHz,  $\text{CDCl}_3$ )**

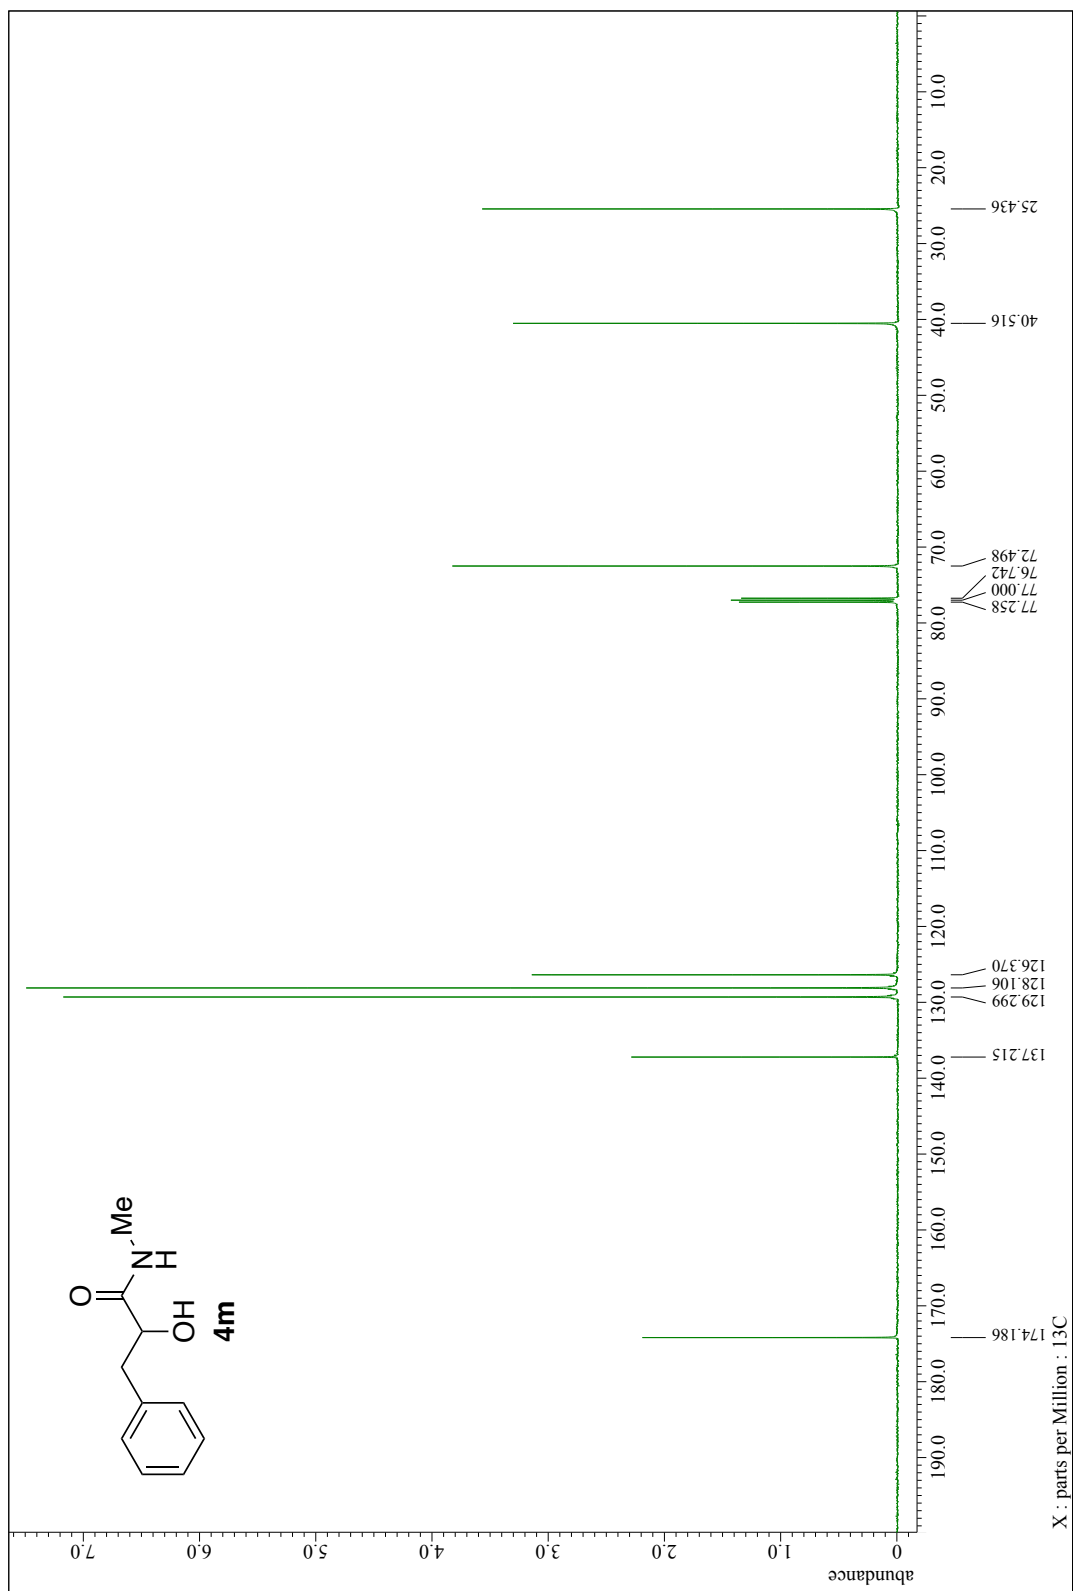

**<sup>1</sup>H NMR spectrum of 4n (500 MHz, CDCl<sub>3</sub>)**

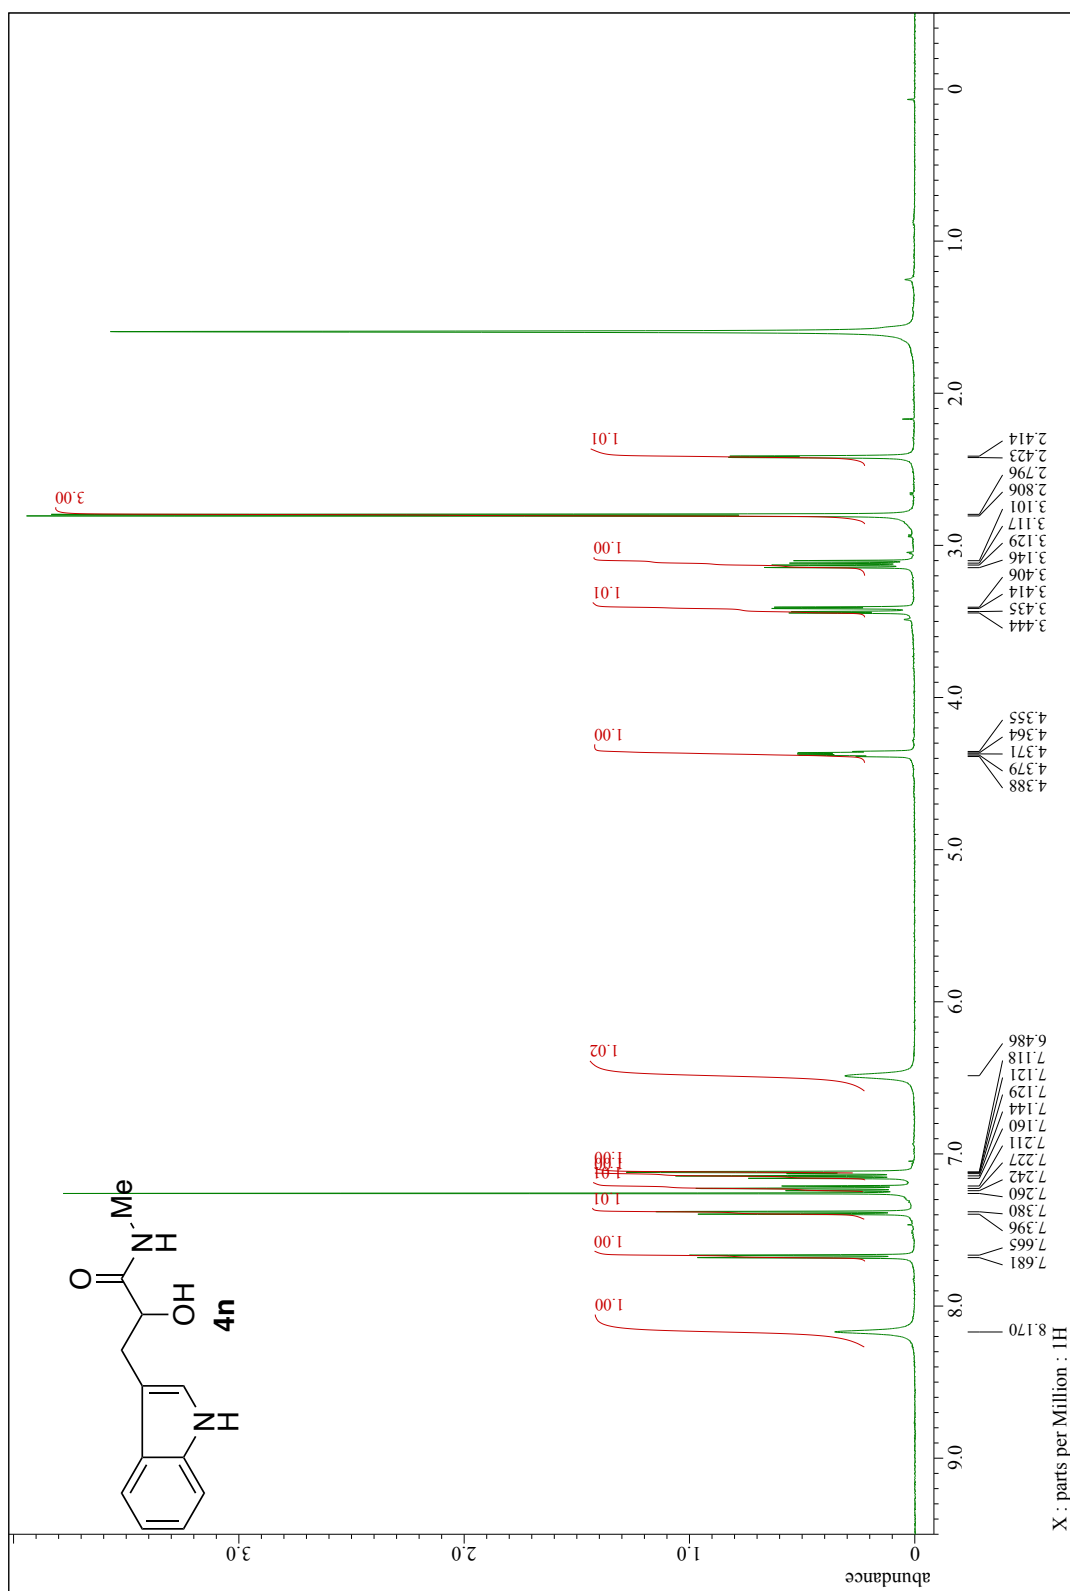

**$^{13}\text{C}$  NMR spectrum of 4n (126 MHz,  $\text{CDCl}_3$ )**

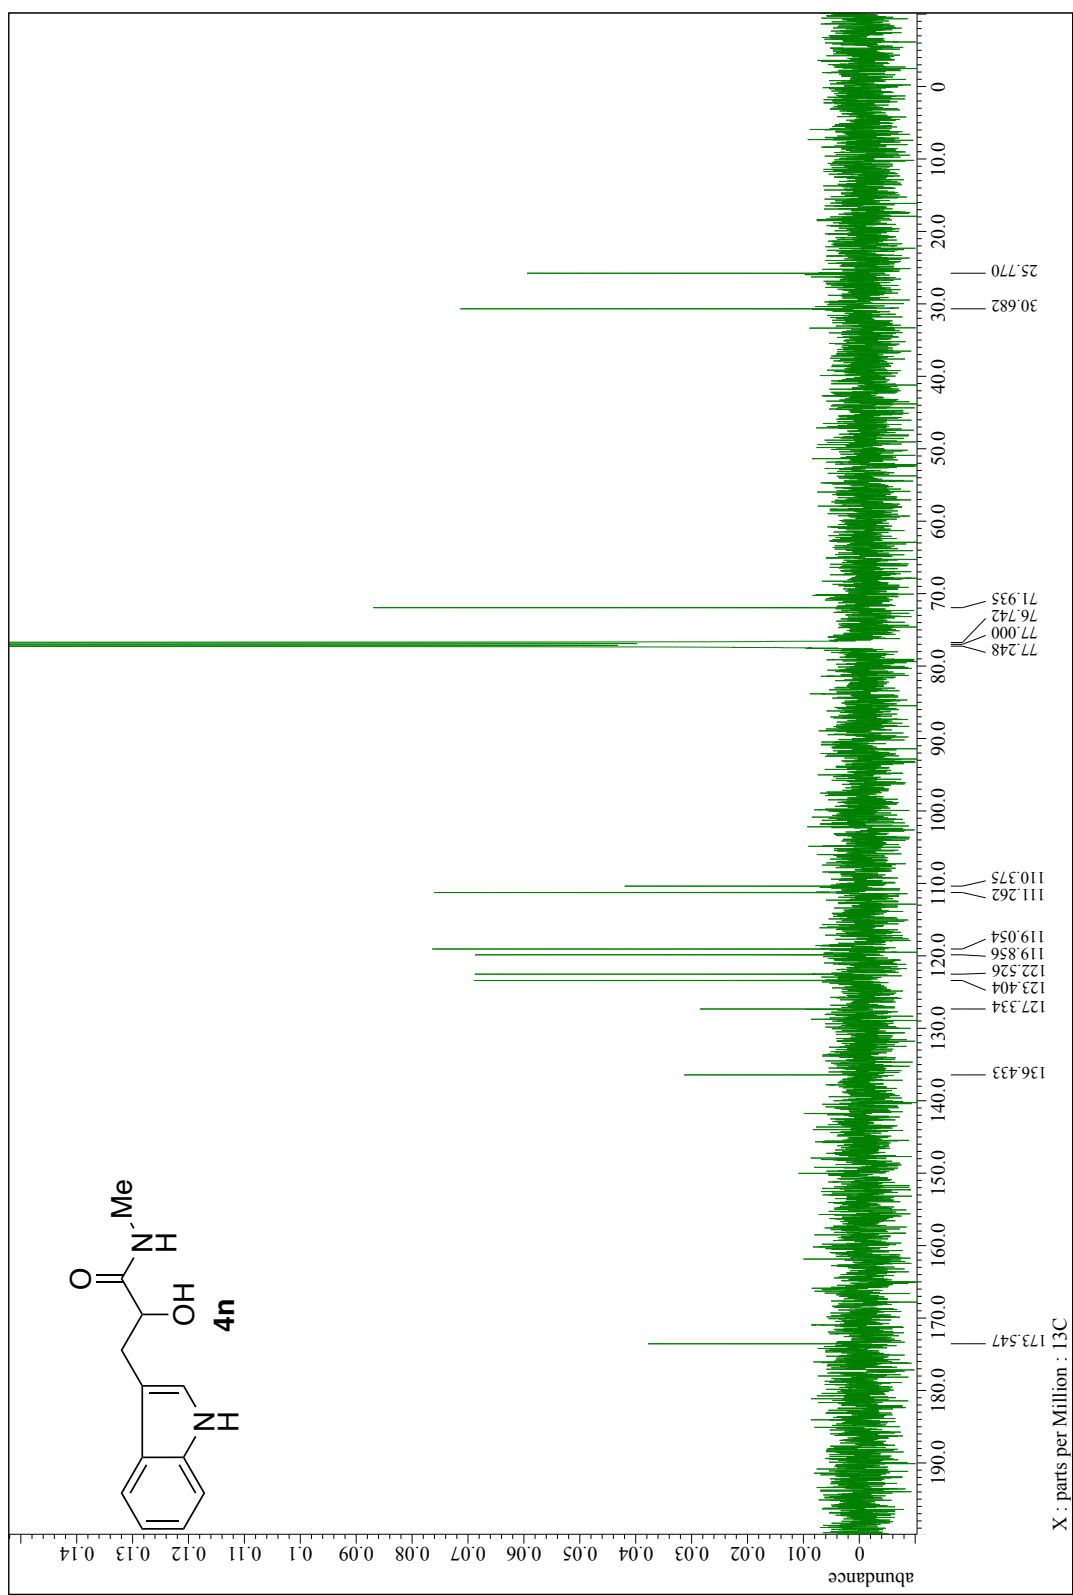

**<sup>1</sup>H NMR spectrum of 5 (500 MHz, CDCl<sub>3</sub>)**

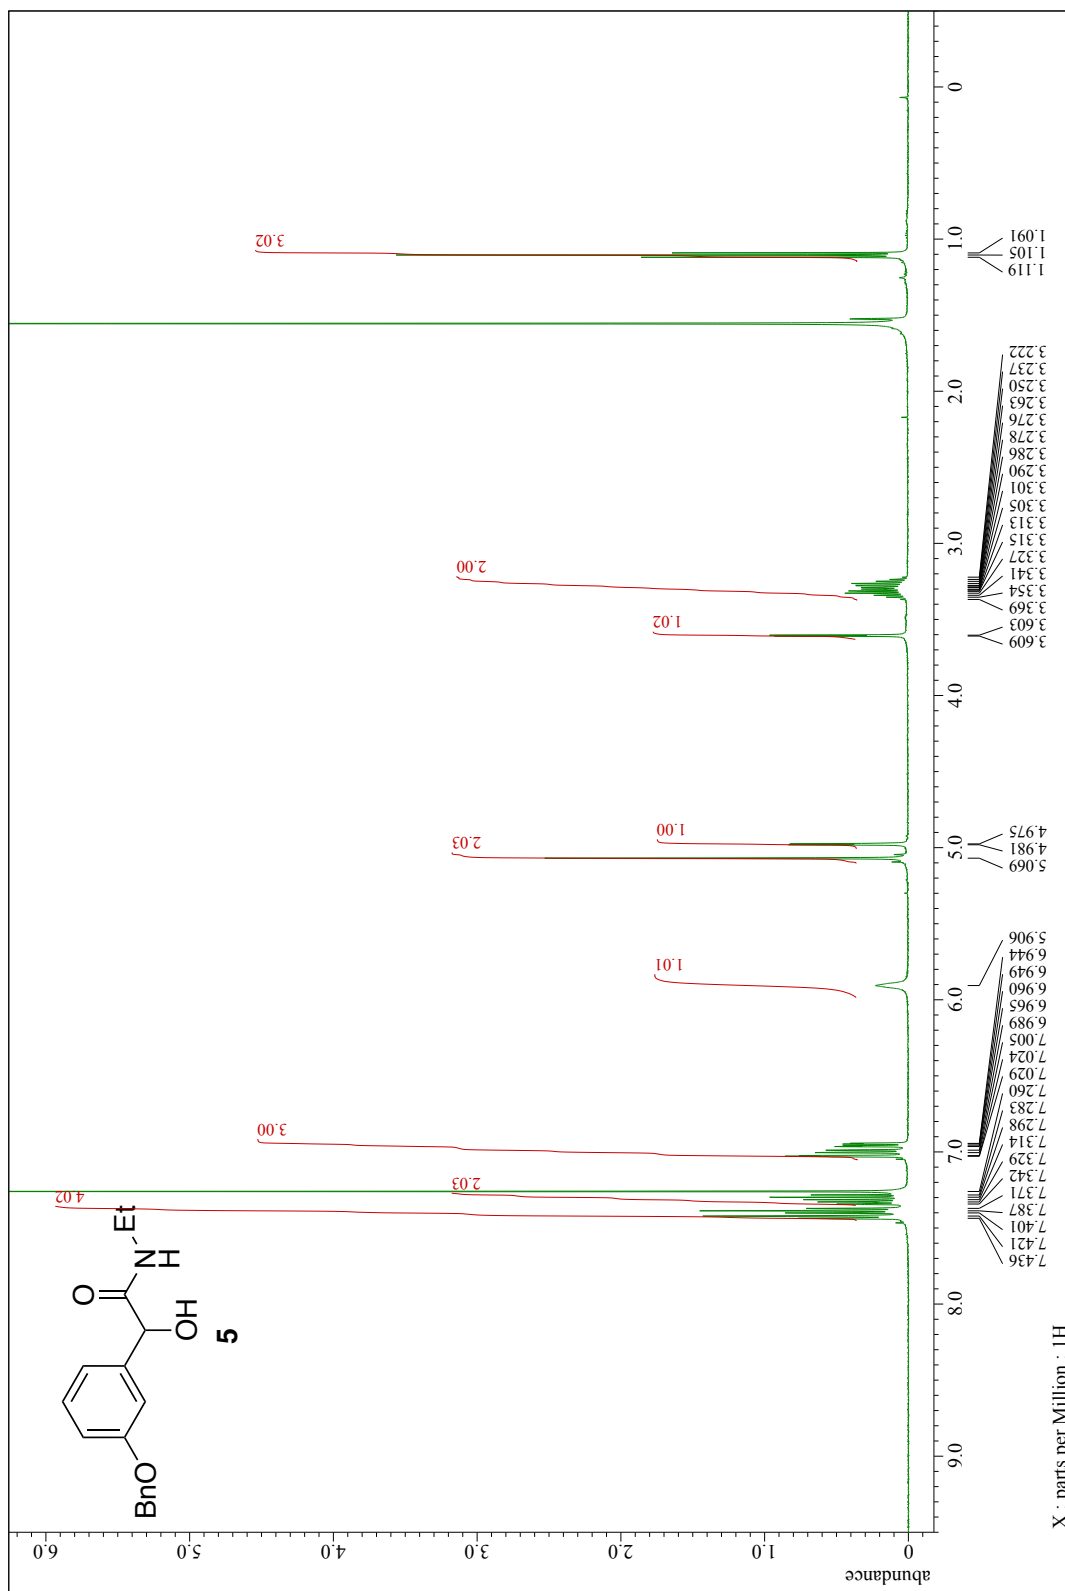



**<sup>13</sup>C NMR spectrum of 5 (126 MHz, CDCl<sub>3</sub>)**

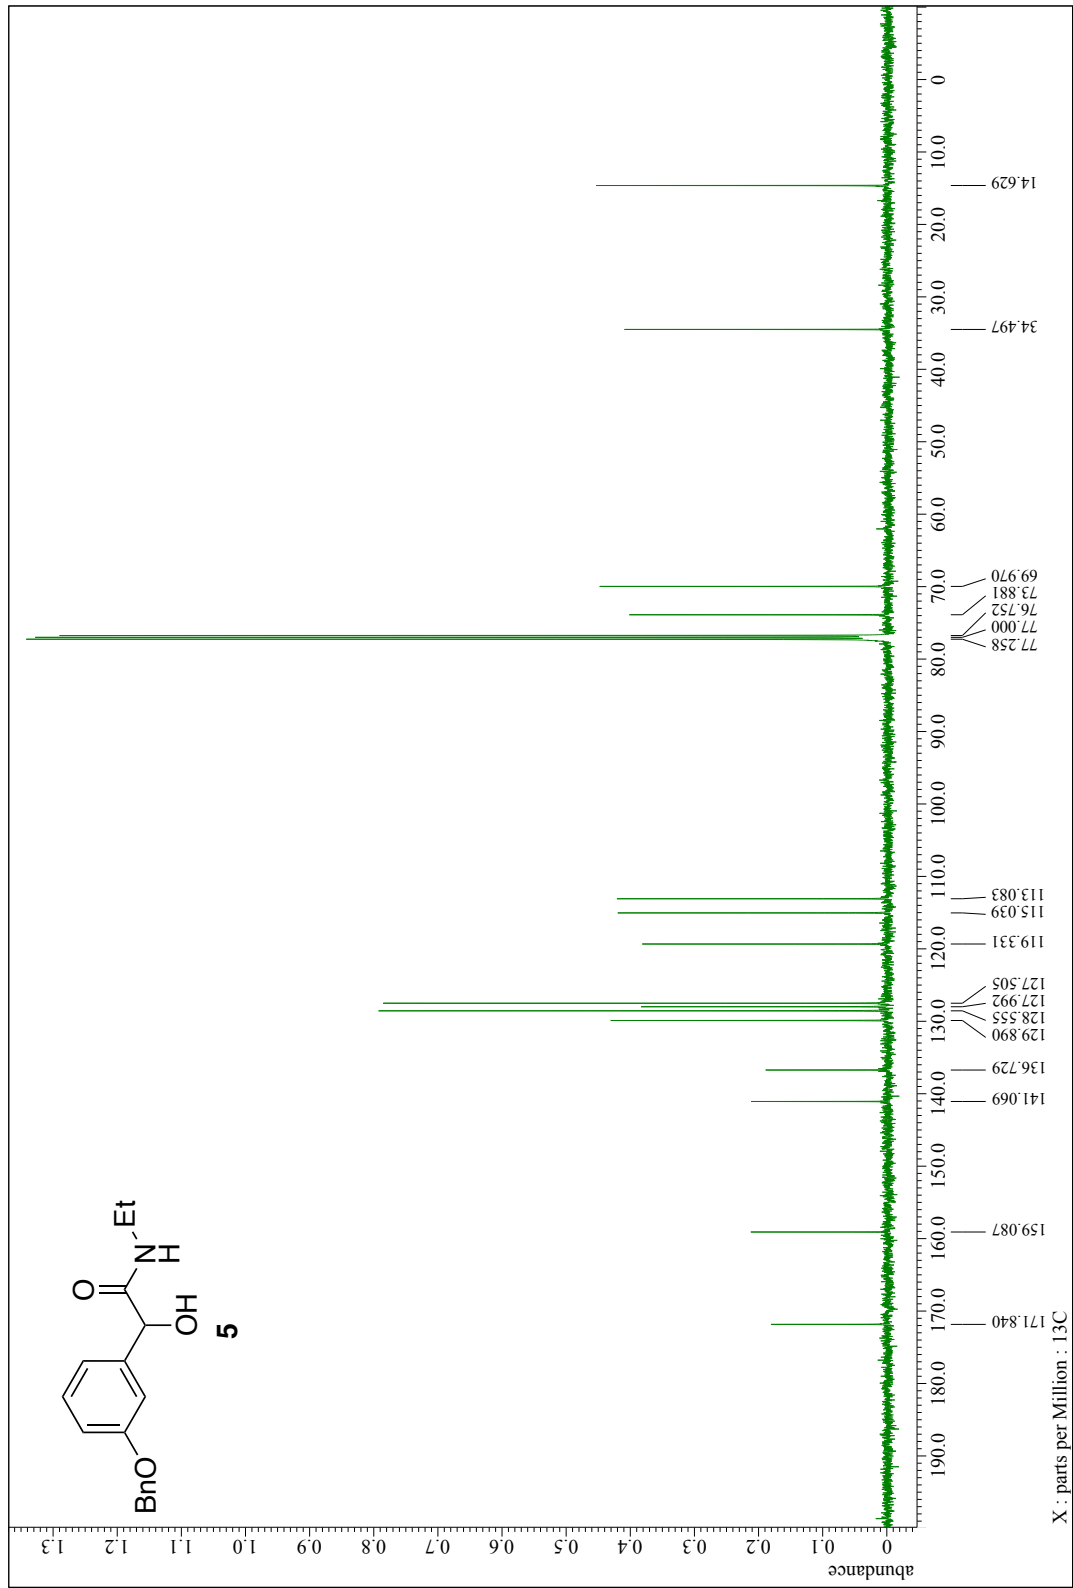

# $^1\text{H}$ NMR spectrum of **6** (500 MHz, $\text{CDCl}_3$ )

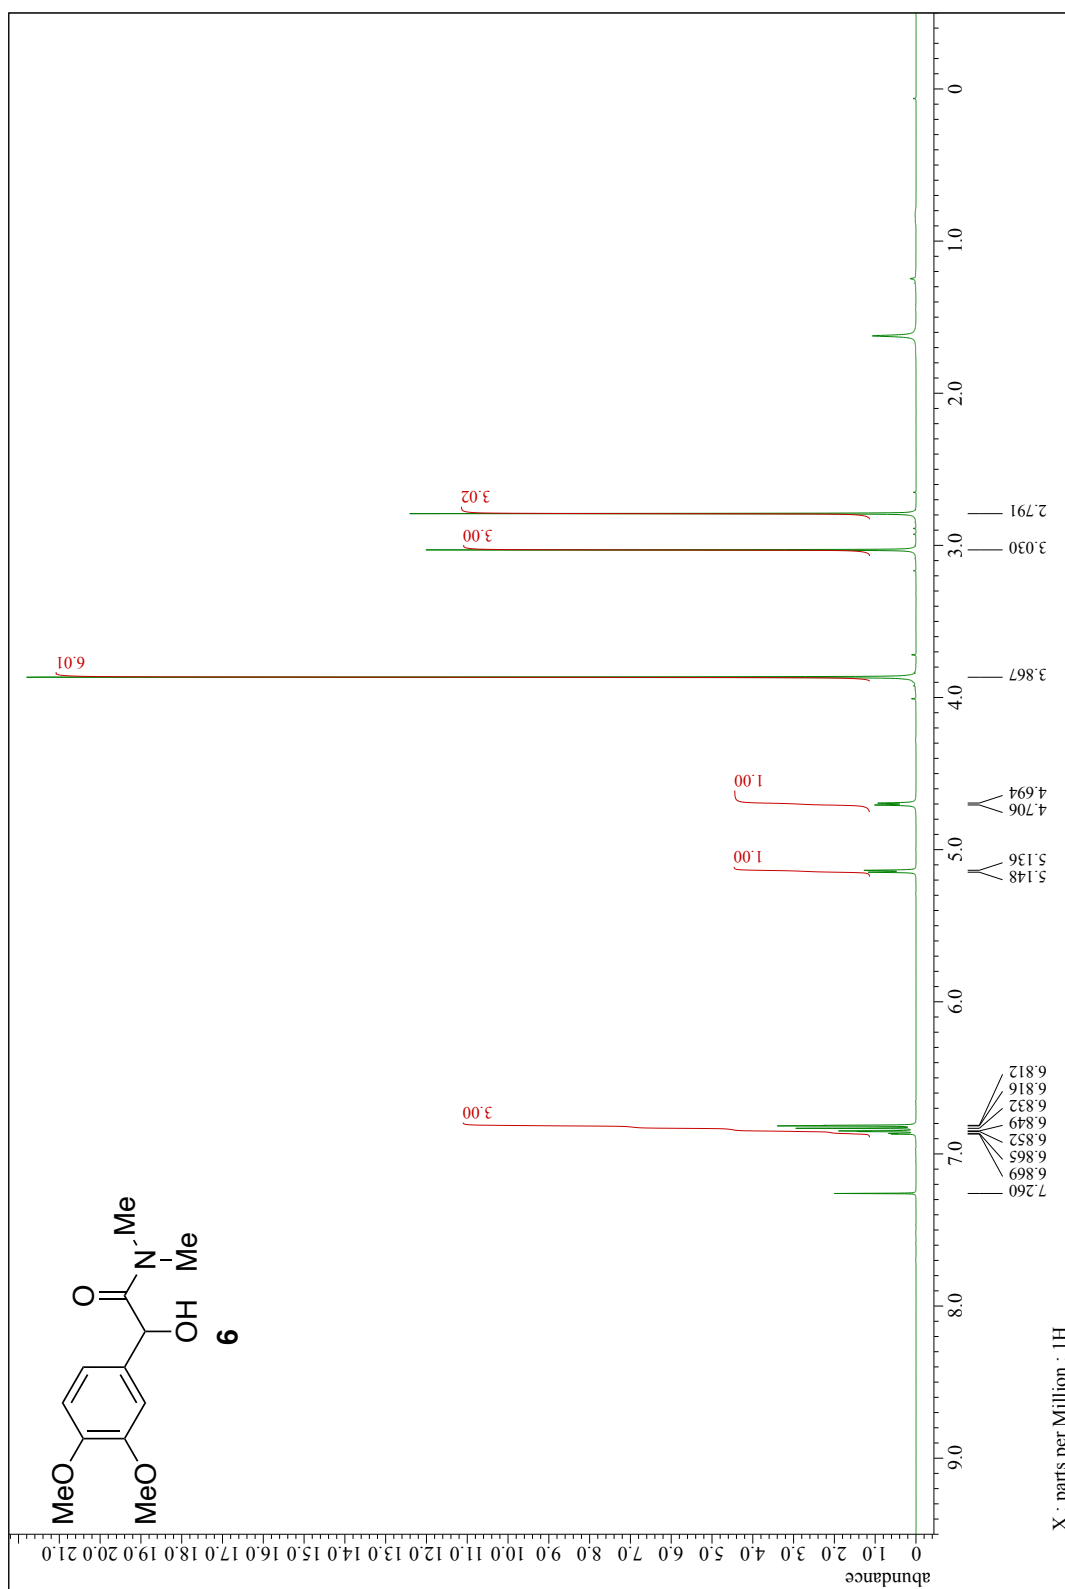

**$^{13}\text{C}$  NMR spectrum of 6 (126 MHz,  $\text{CDCl}_3$ )**

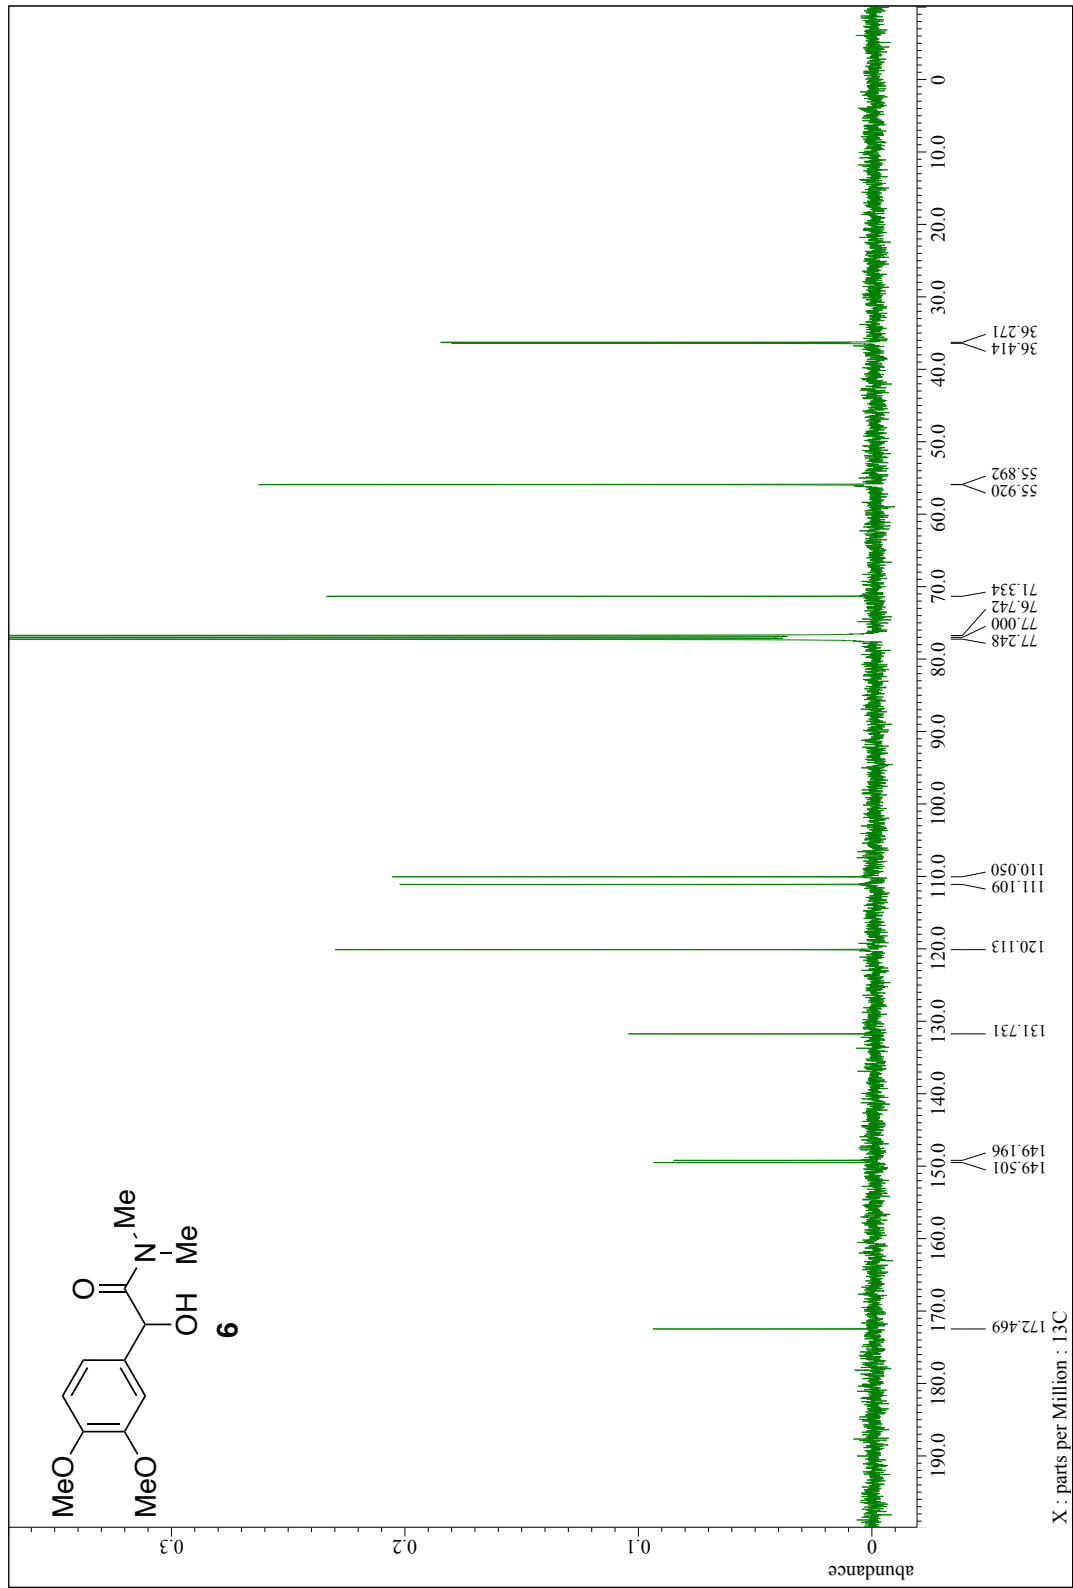

**<sup>1</sup>H NMR spectrum of 8 (500 MHz, CDCl<sub>3</sub>)**

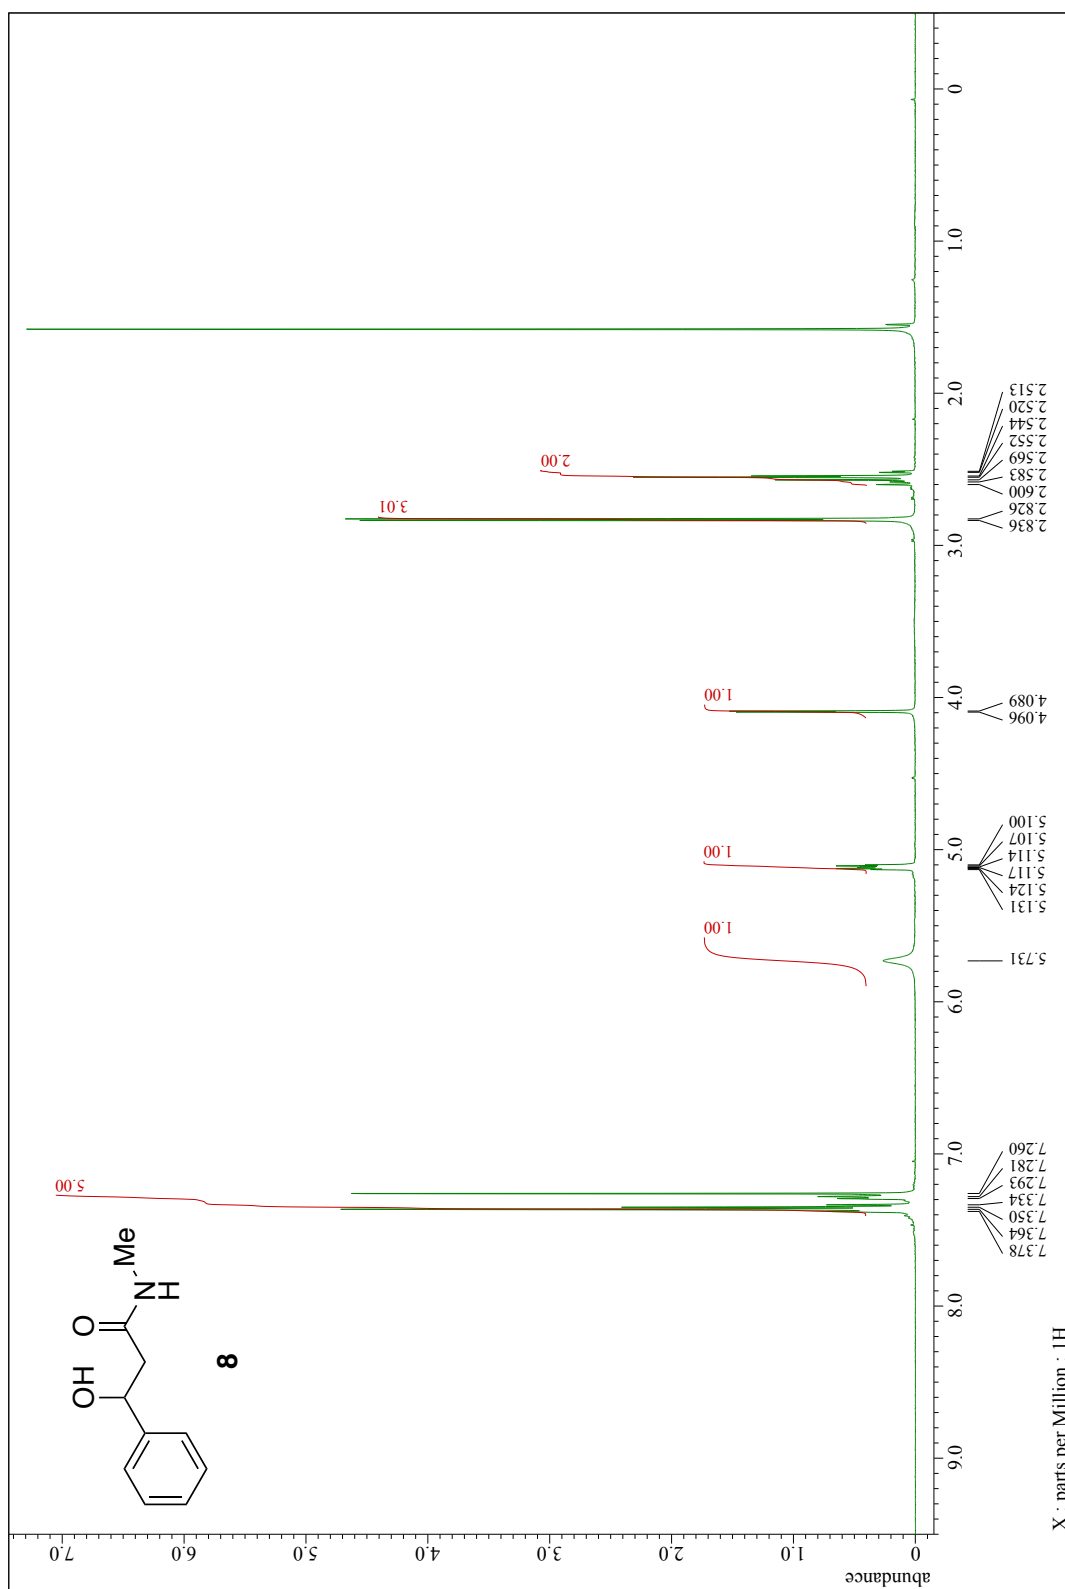

**$^{13}\text{C}$  NMR spectrum of 8 (126 MHz,  $\text{CDCl}_3$ )**

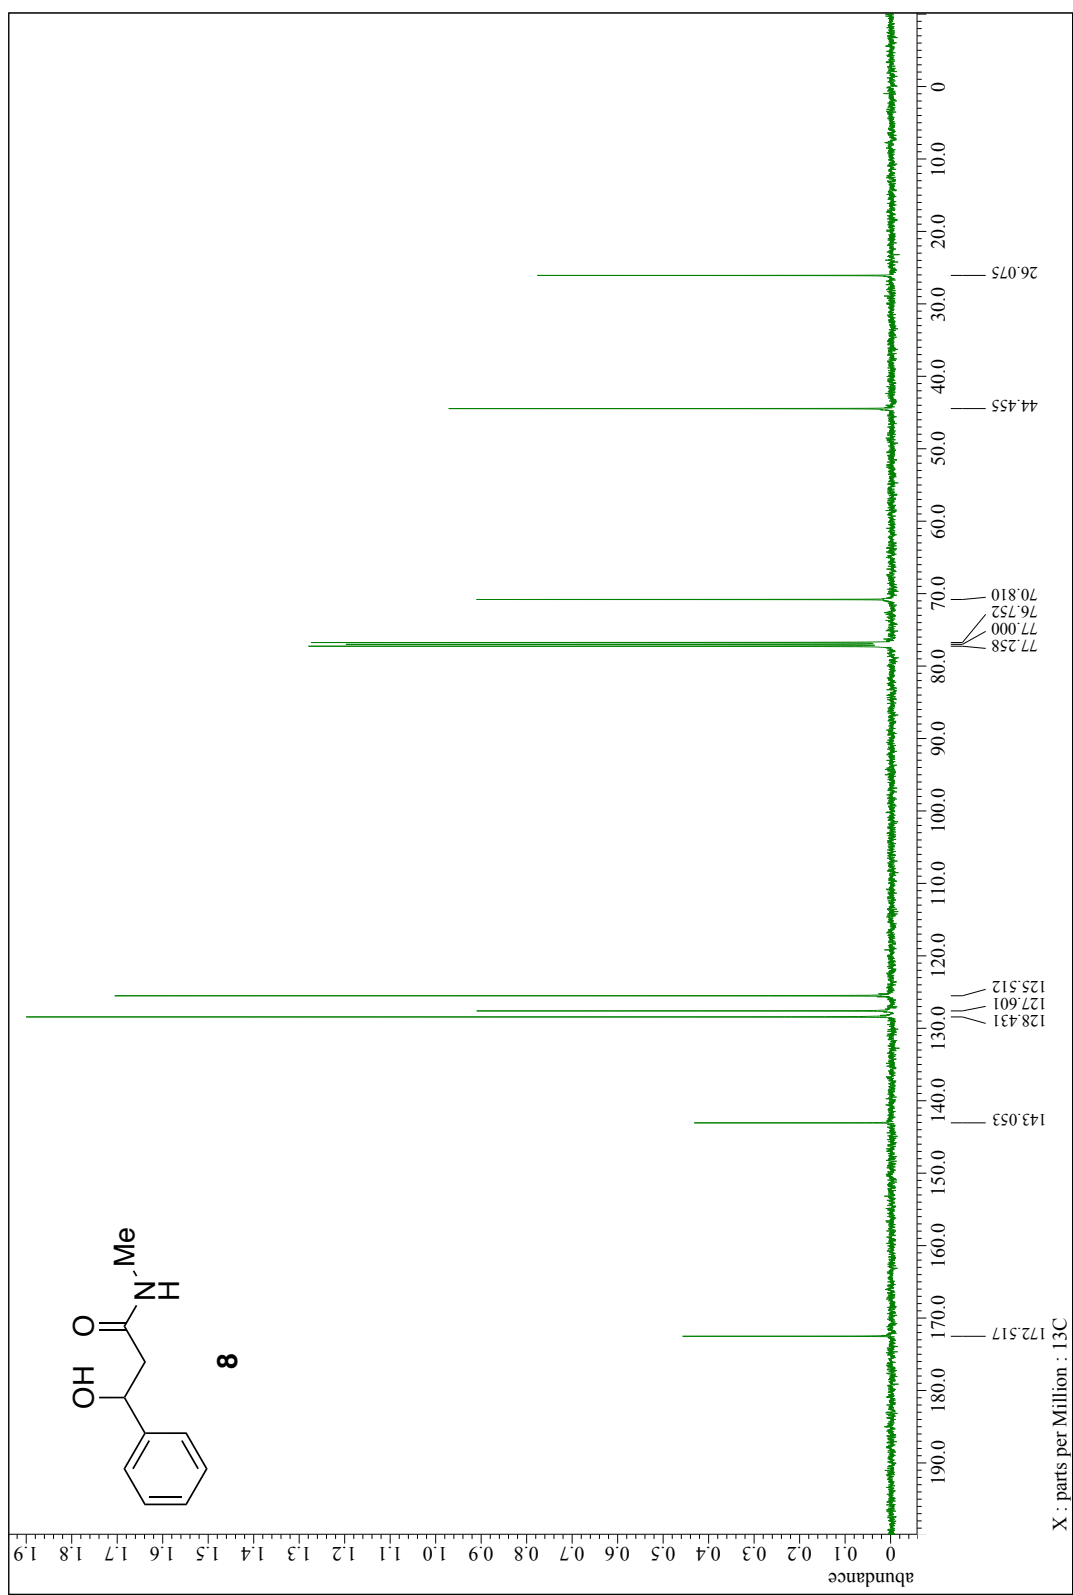

**<sup>1</sup>H NMR spectrum of 11 (500 MHz, DMSO-d6)**

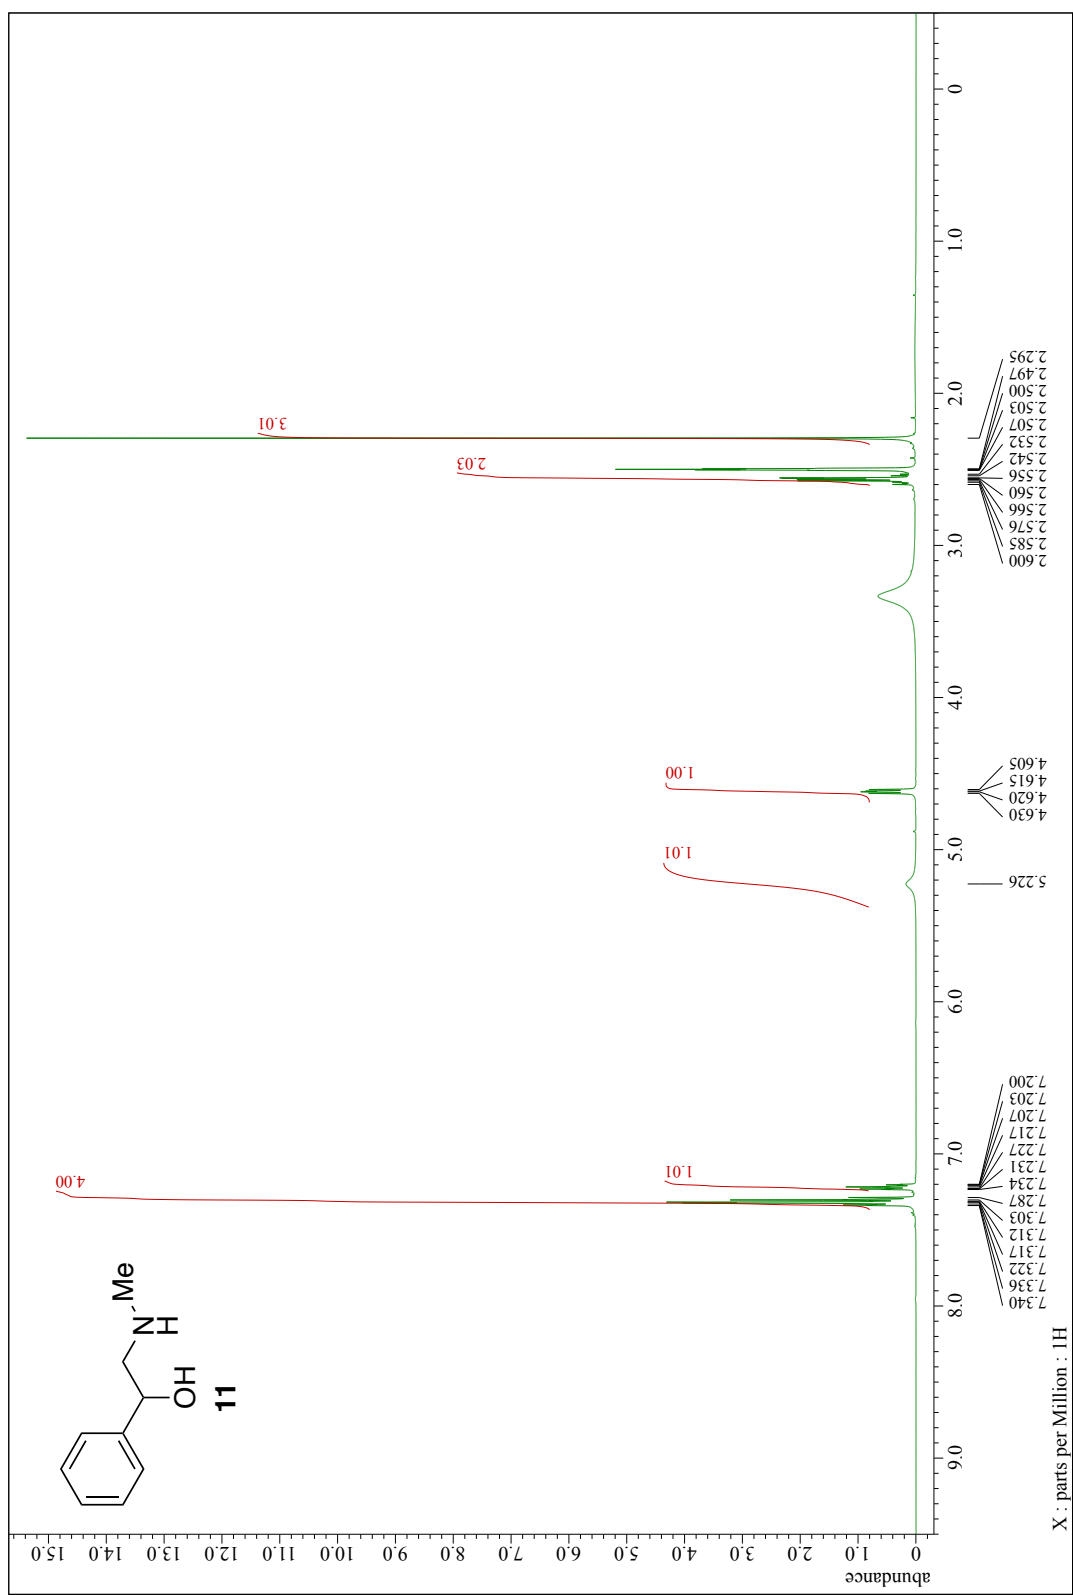

**<sup>13</sup>C NMR spectrum of 11 (126 MHz, DMSO-d6)**

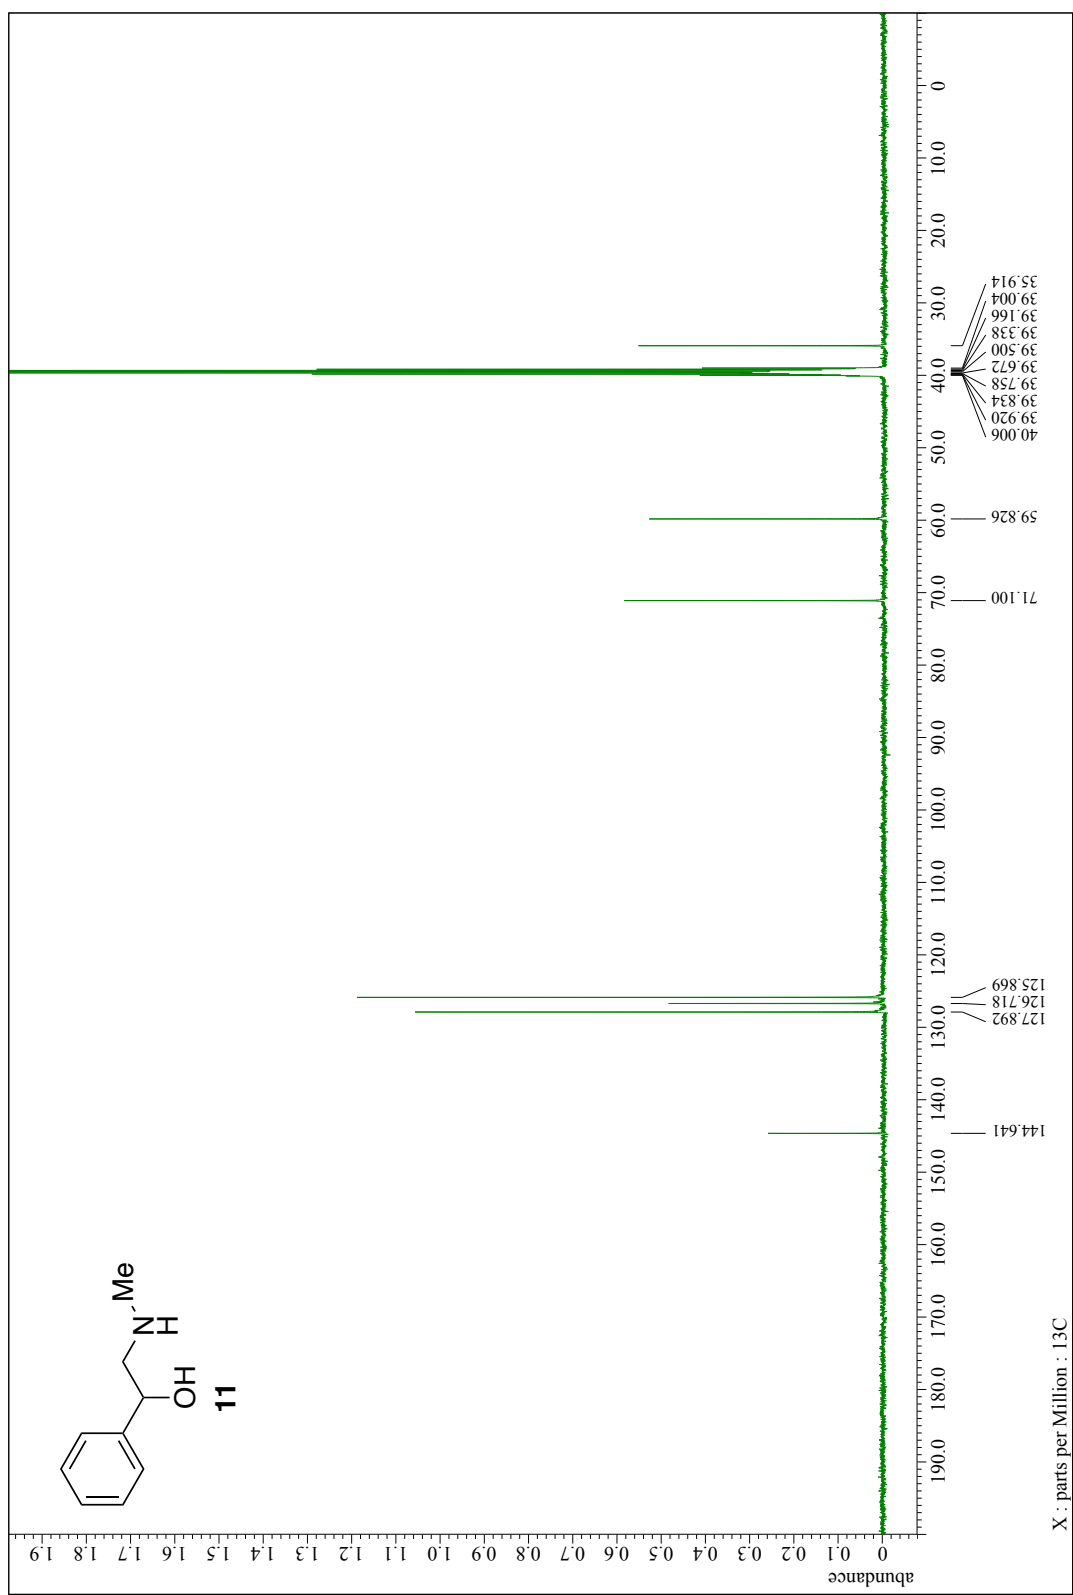

**<sup>1</sup>H NMR spectrum of 12 (500 MHz, DMSO-d<sub>6</sub>)**

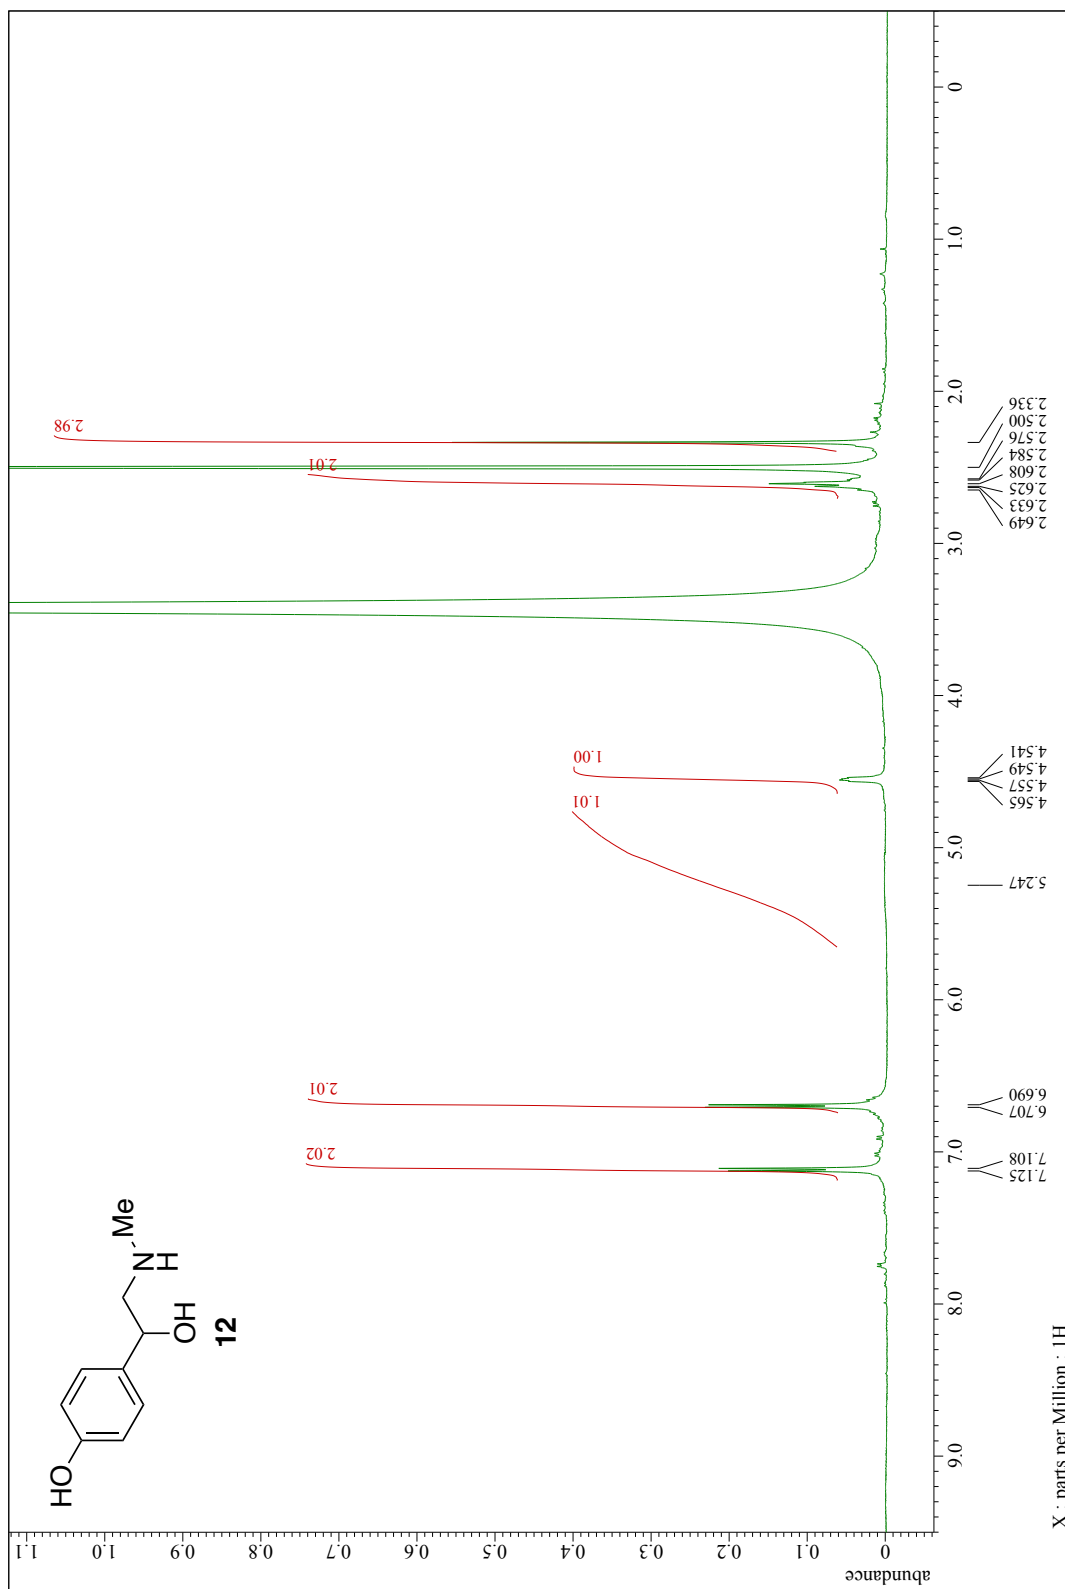



**$^{13}\text{C}$  NMR spectrum of 12 (126 MHz, DMSO- $d_6$ )**

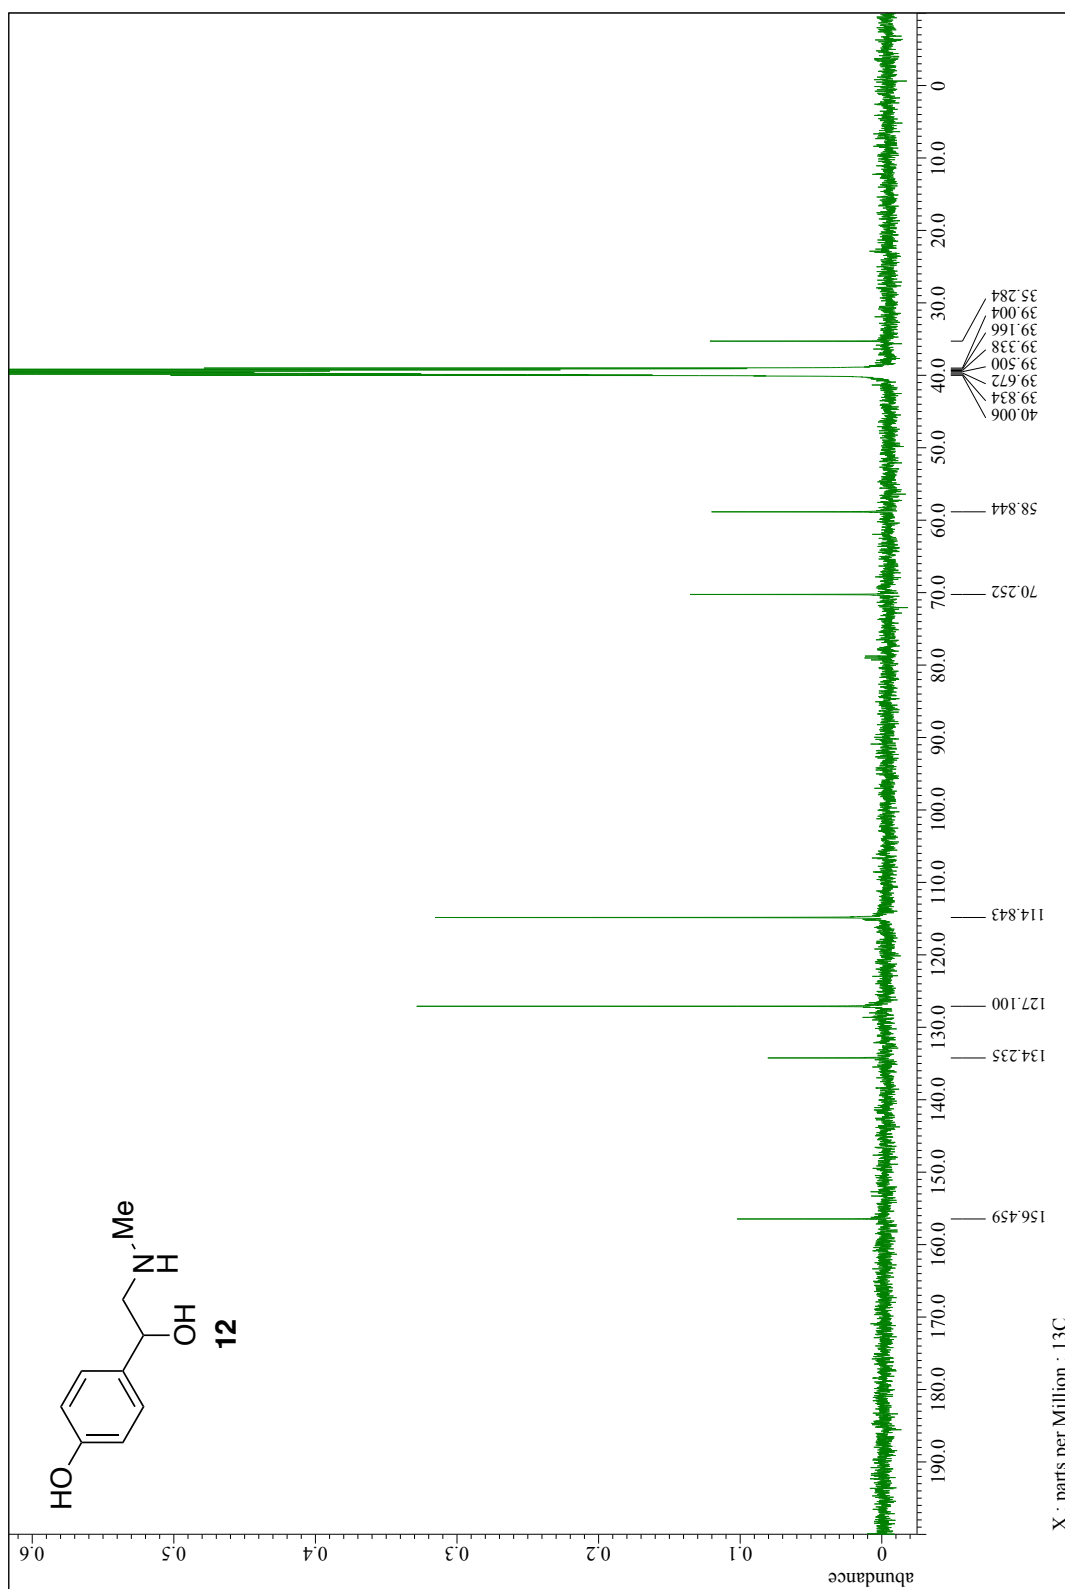

**<sup>1</sup>H NMR spectrum of 13 (500 MHz, DMSO-d<sub>6</sub>)**

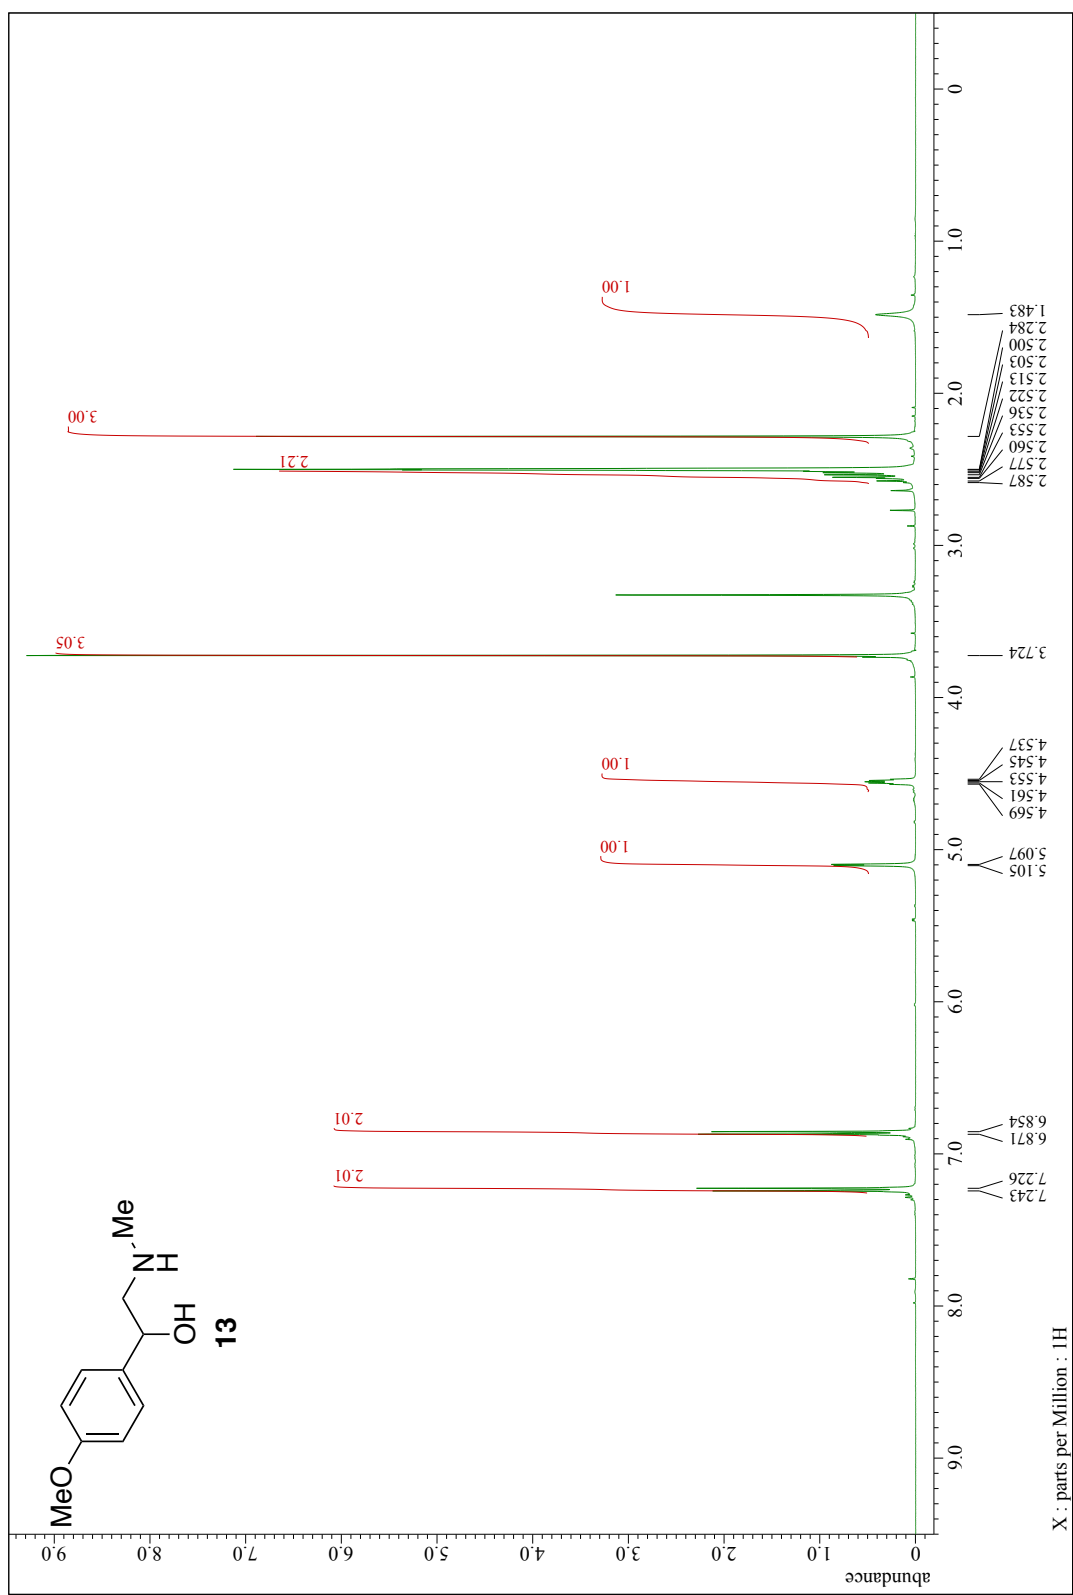

**$^{13}\text{C}$  NMR spectrum of 13 (126 MHz, DMSO- $d_6$ )**

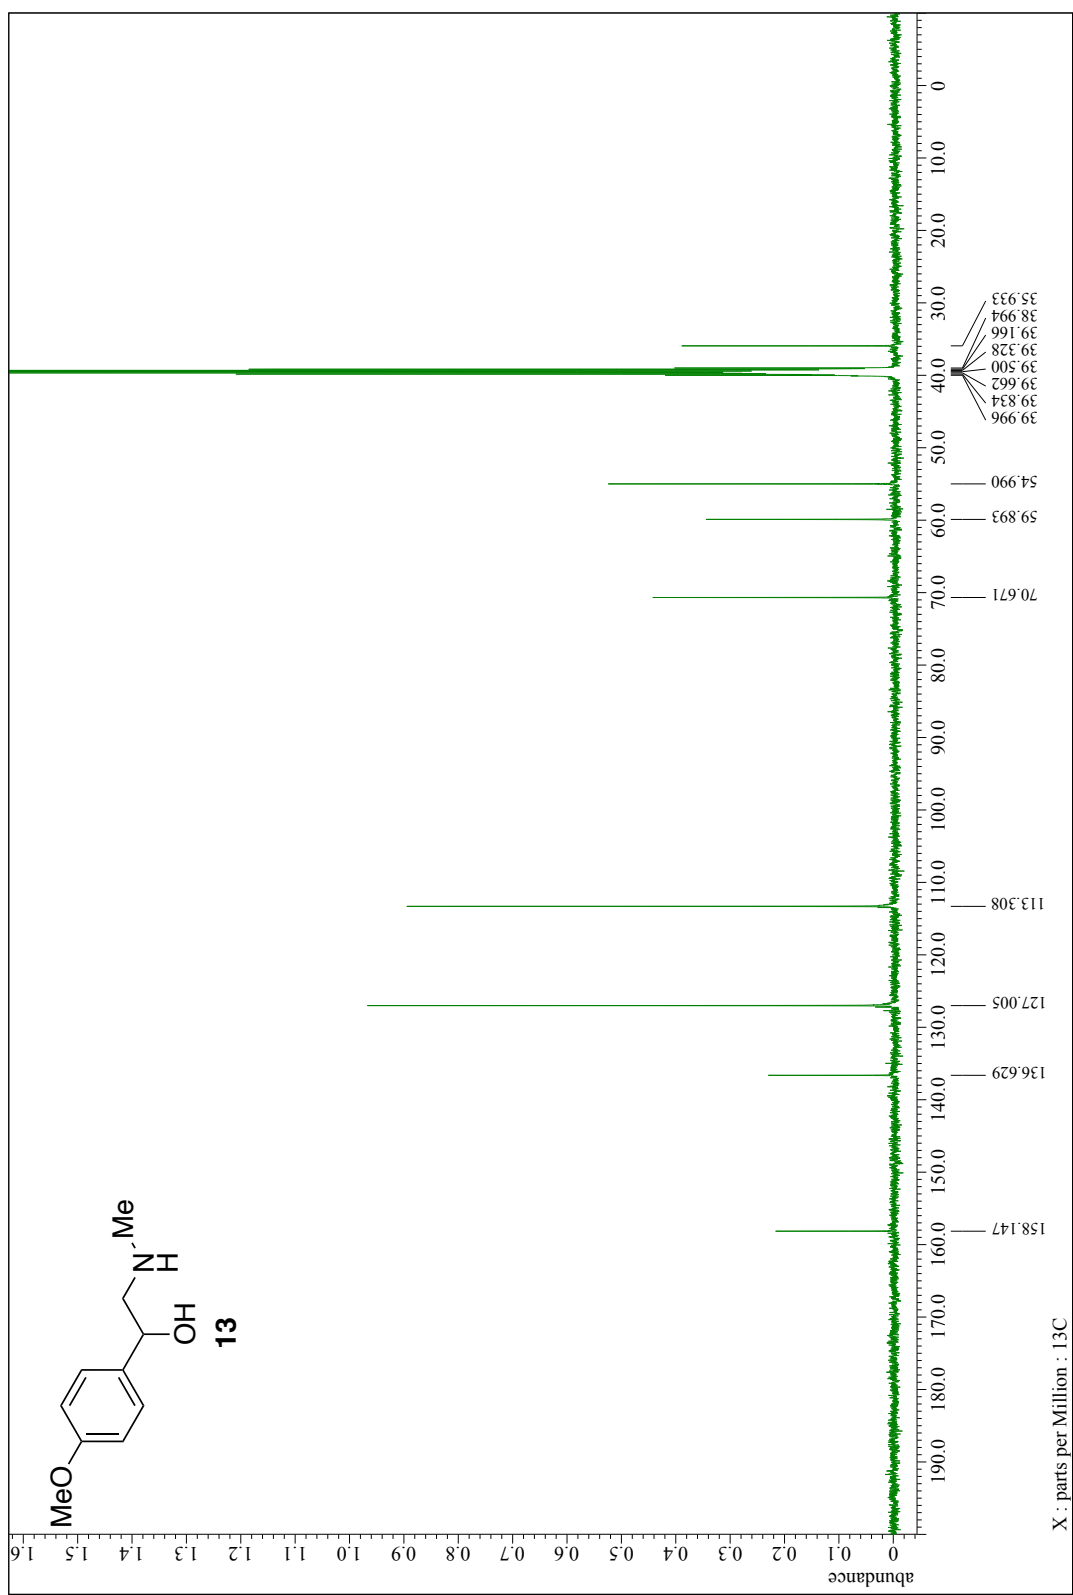

**<sup>1</sup>H NMR spectrum of 14 (500 MHz, DMSO-d6)**

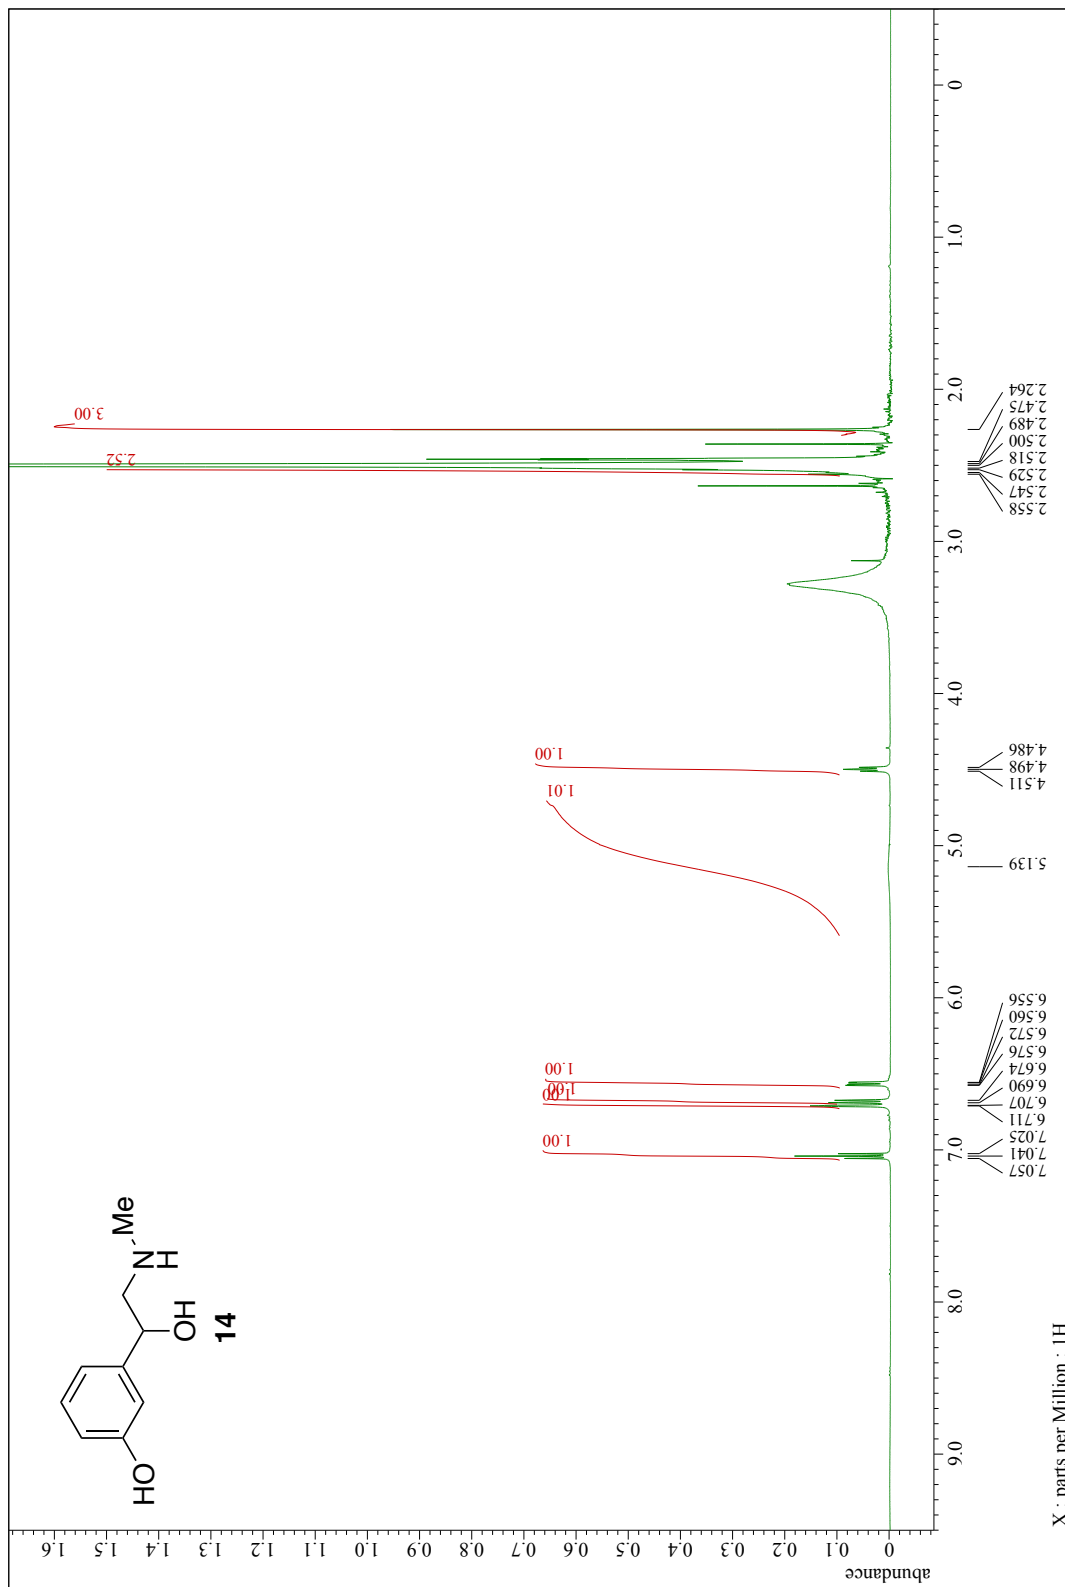

**<sup>13</sup>C NMR spectrum of 14 (126 MHz, DMSO-*d*<sub>6</sub>)**

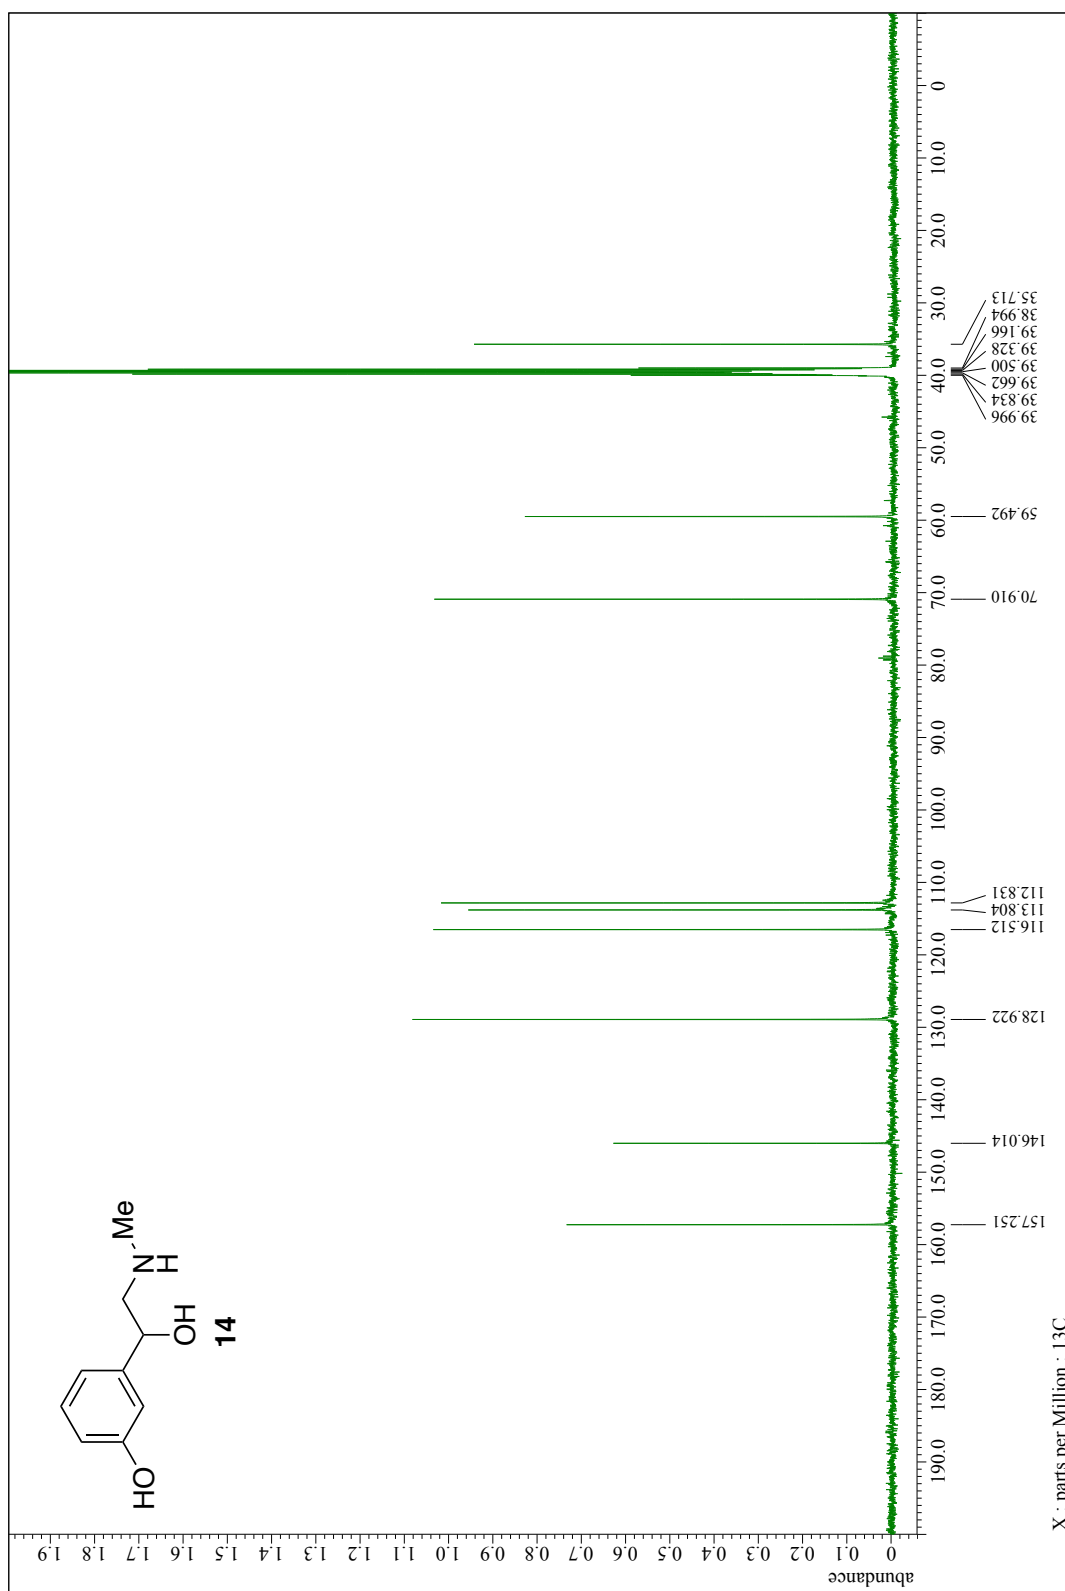

**<sup>1</sup>H NMR spectrum of 15 (500 MHz, DMSO-d6)**

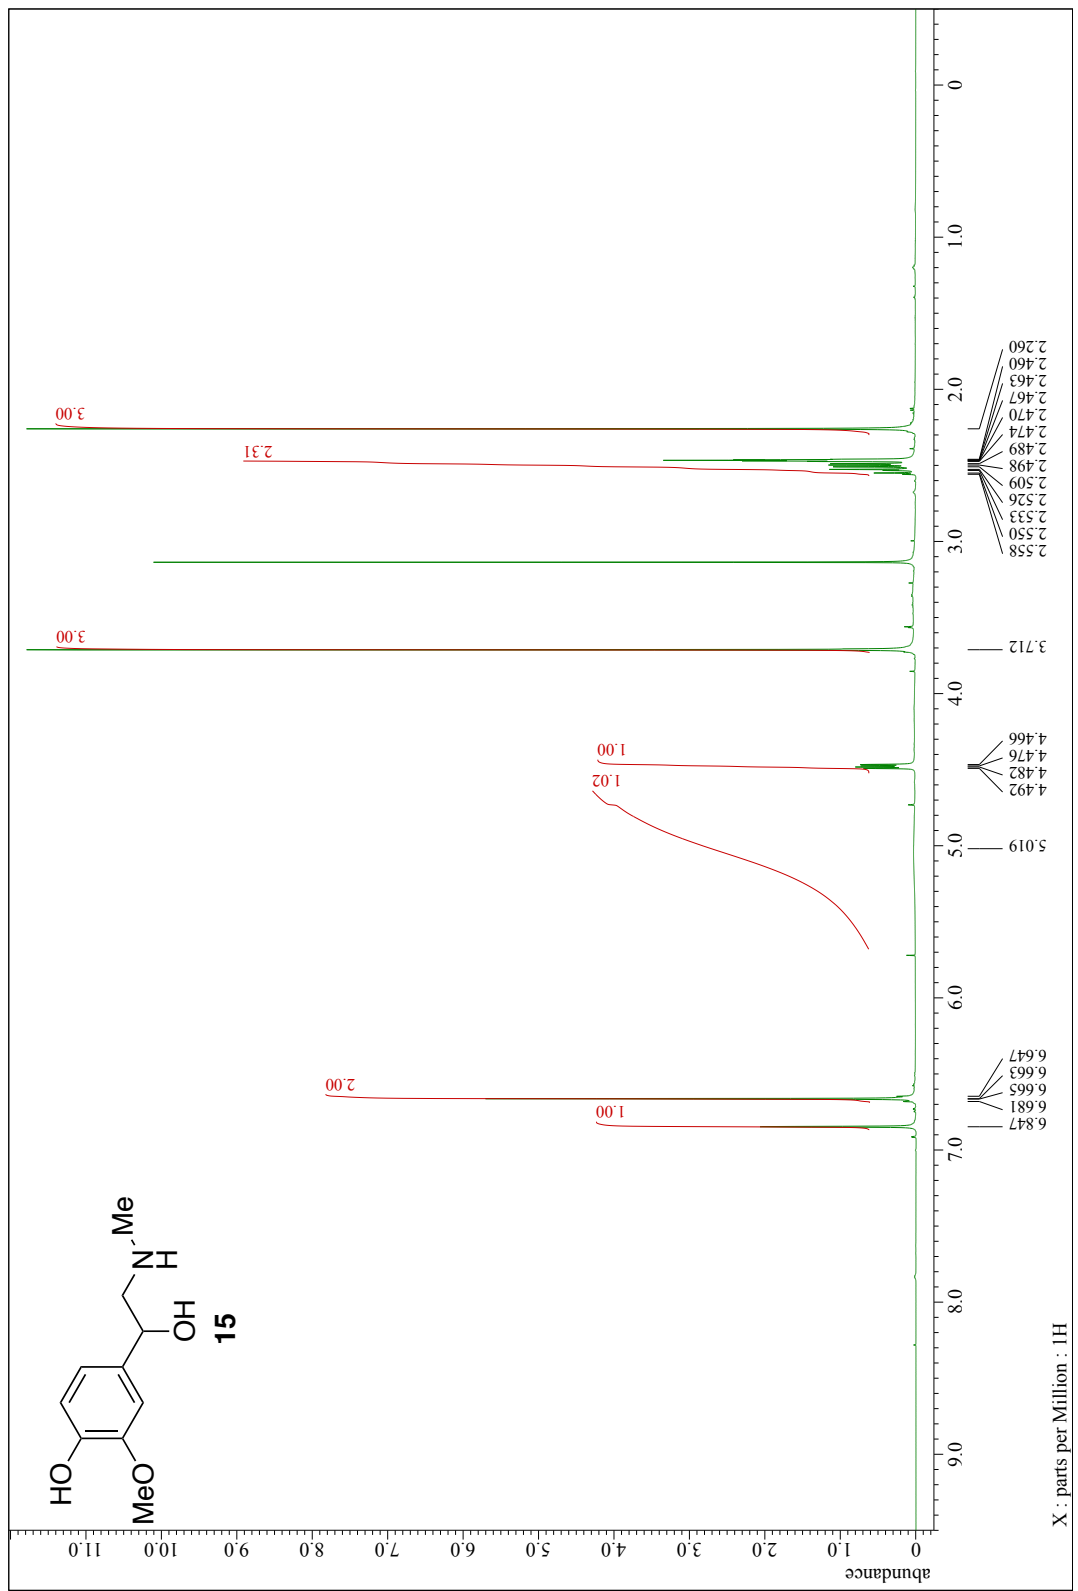

**<sup>13</sup>C NMR spectrum of 15 (126 MHz, DMSO-*d*<sub>6</sub>)**

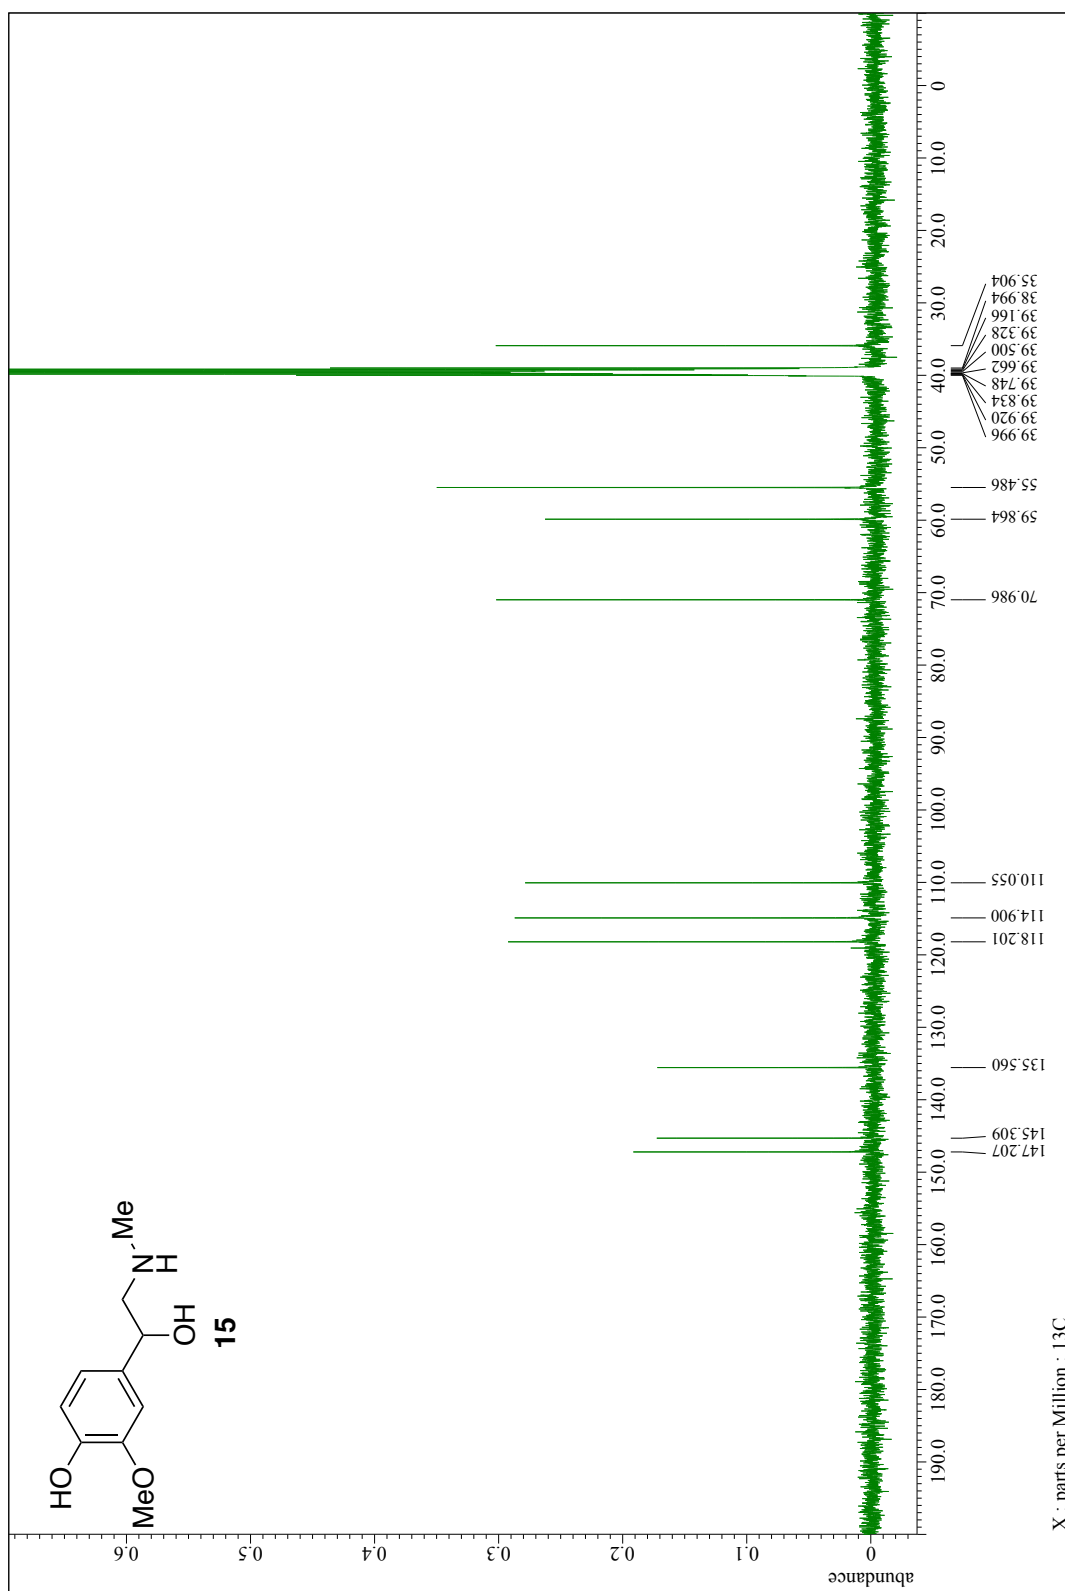

**<sup>1</sup>H NMR spectrum of 16 (500 MHz, DMSO-d6)**

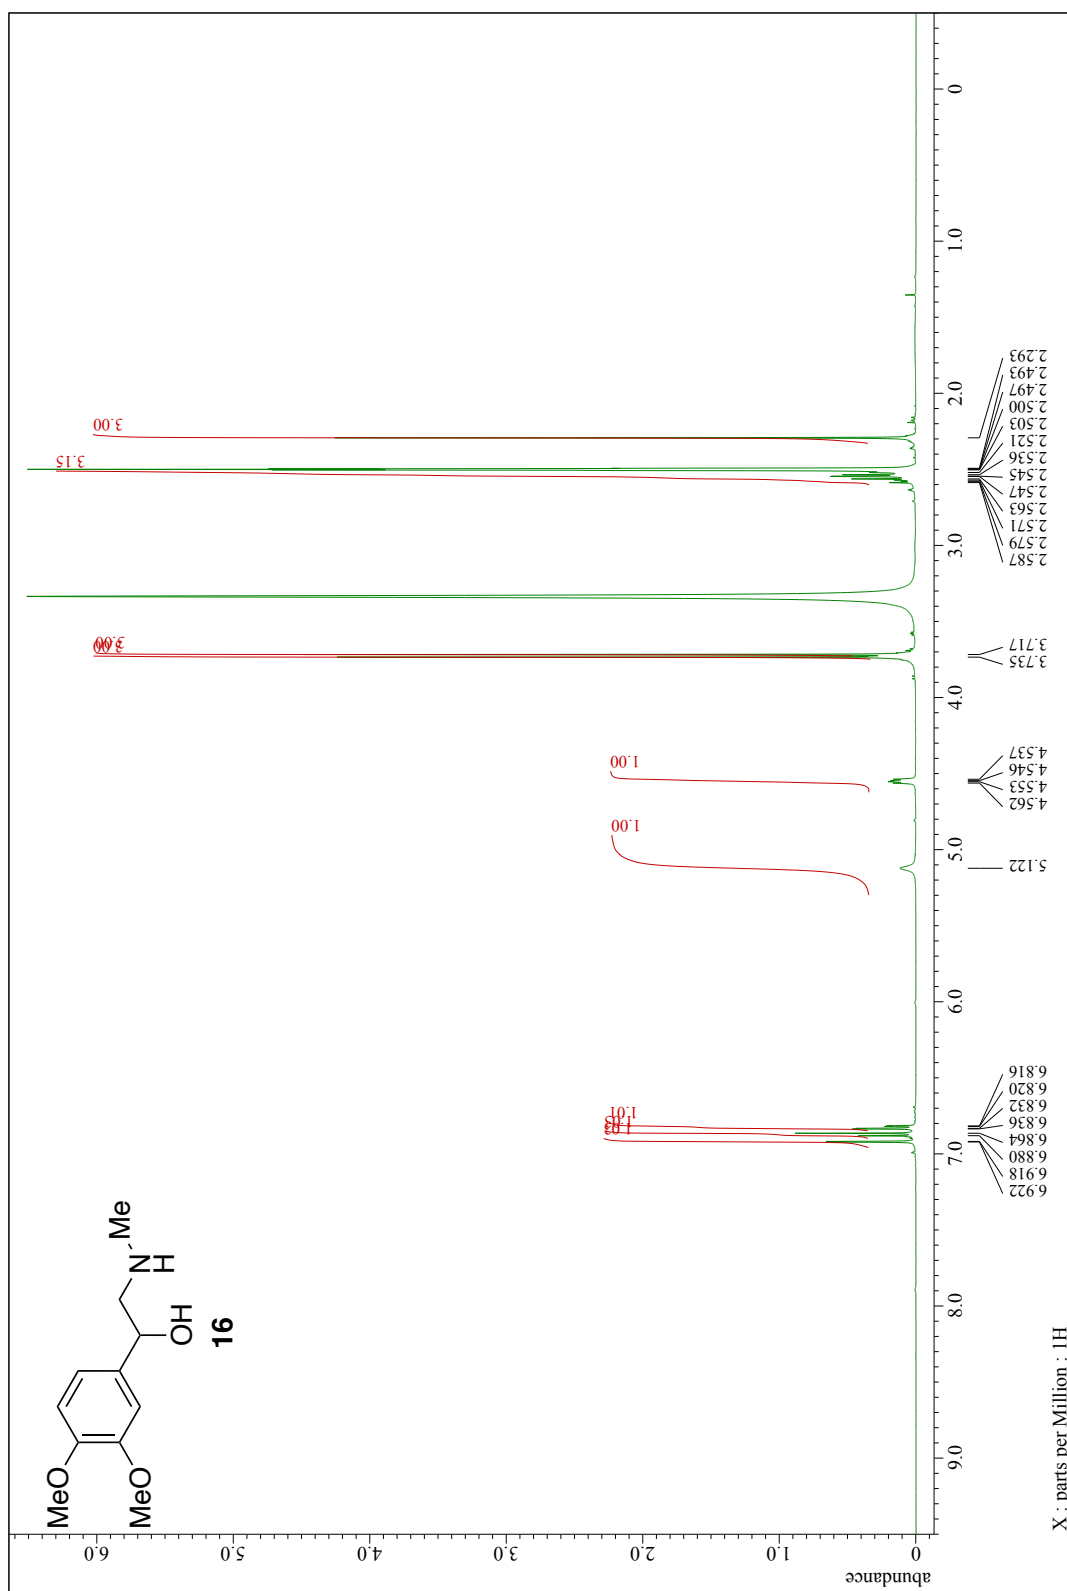



**<sup>13</sup>C NMR spectrum of 16 (126 MHz, DMSO-*d*<sub>6</sub>)**

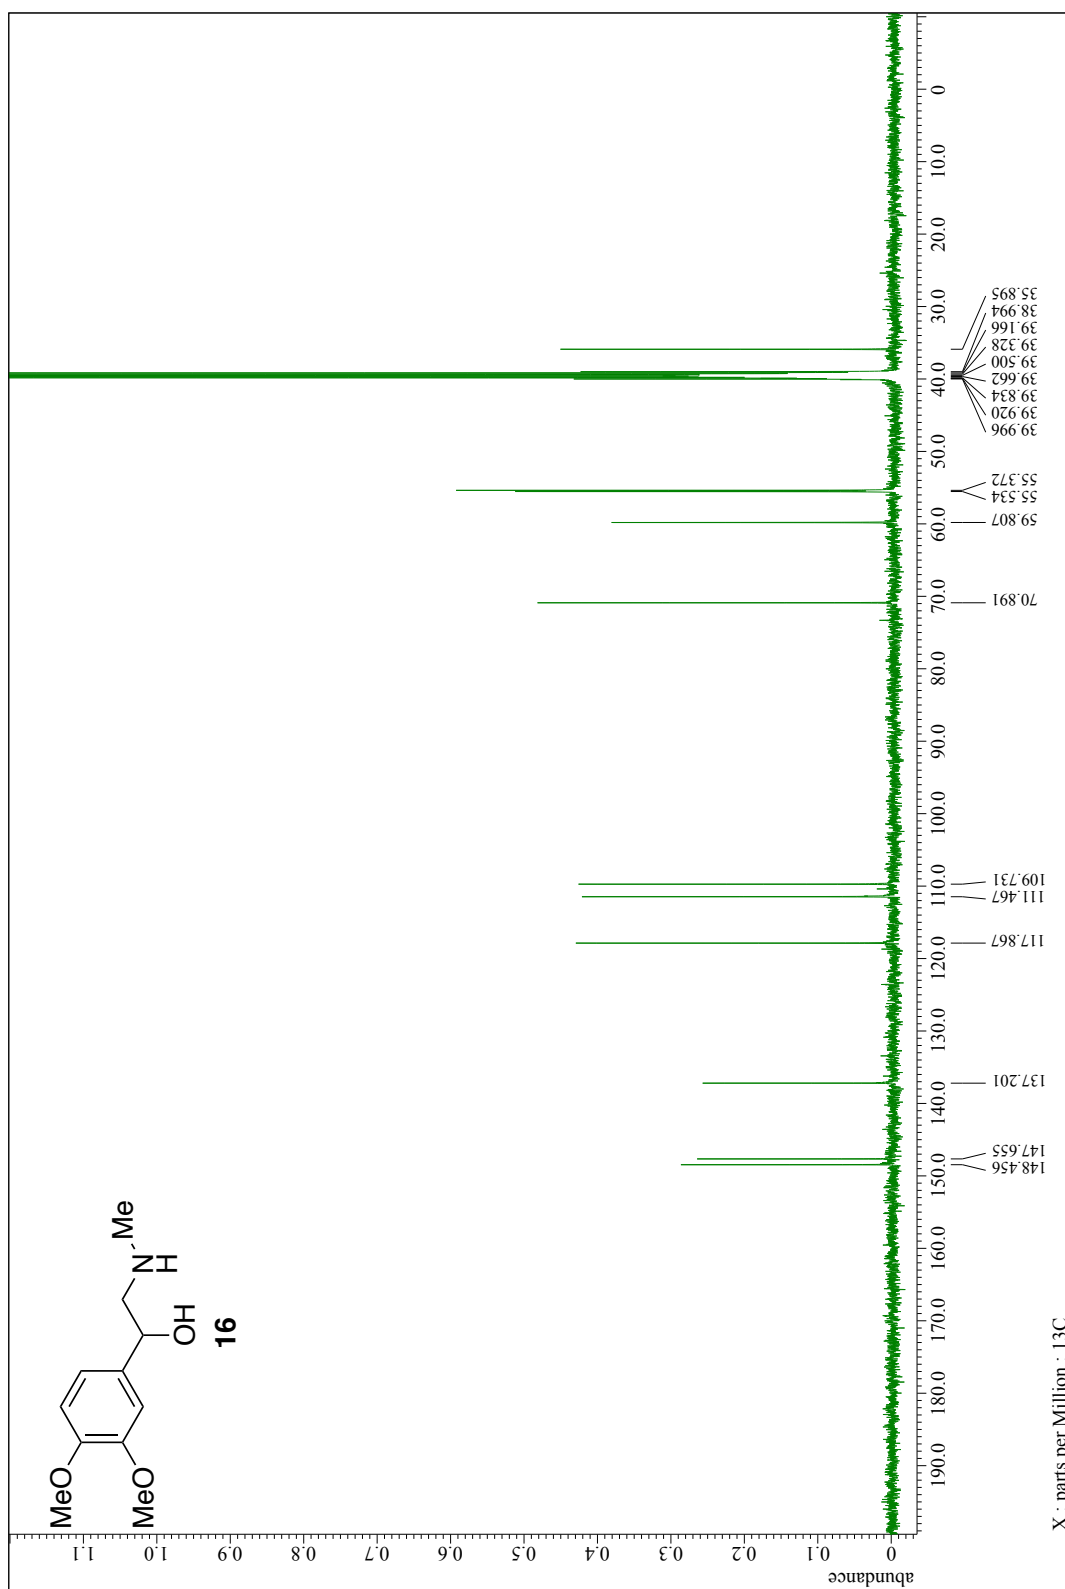

**<sup>1</sup>H NMR spectrum of 17 (500 MHz, DMSO-d<sub>6</sub>)**

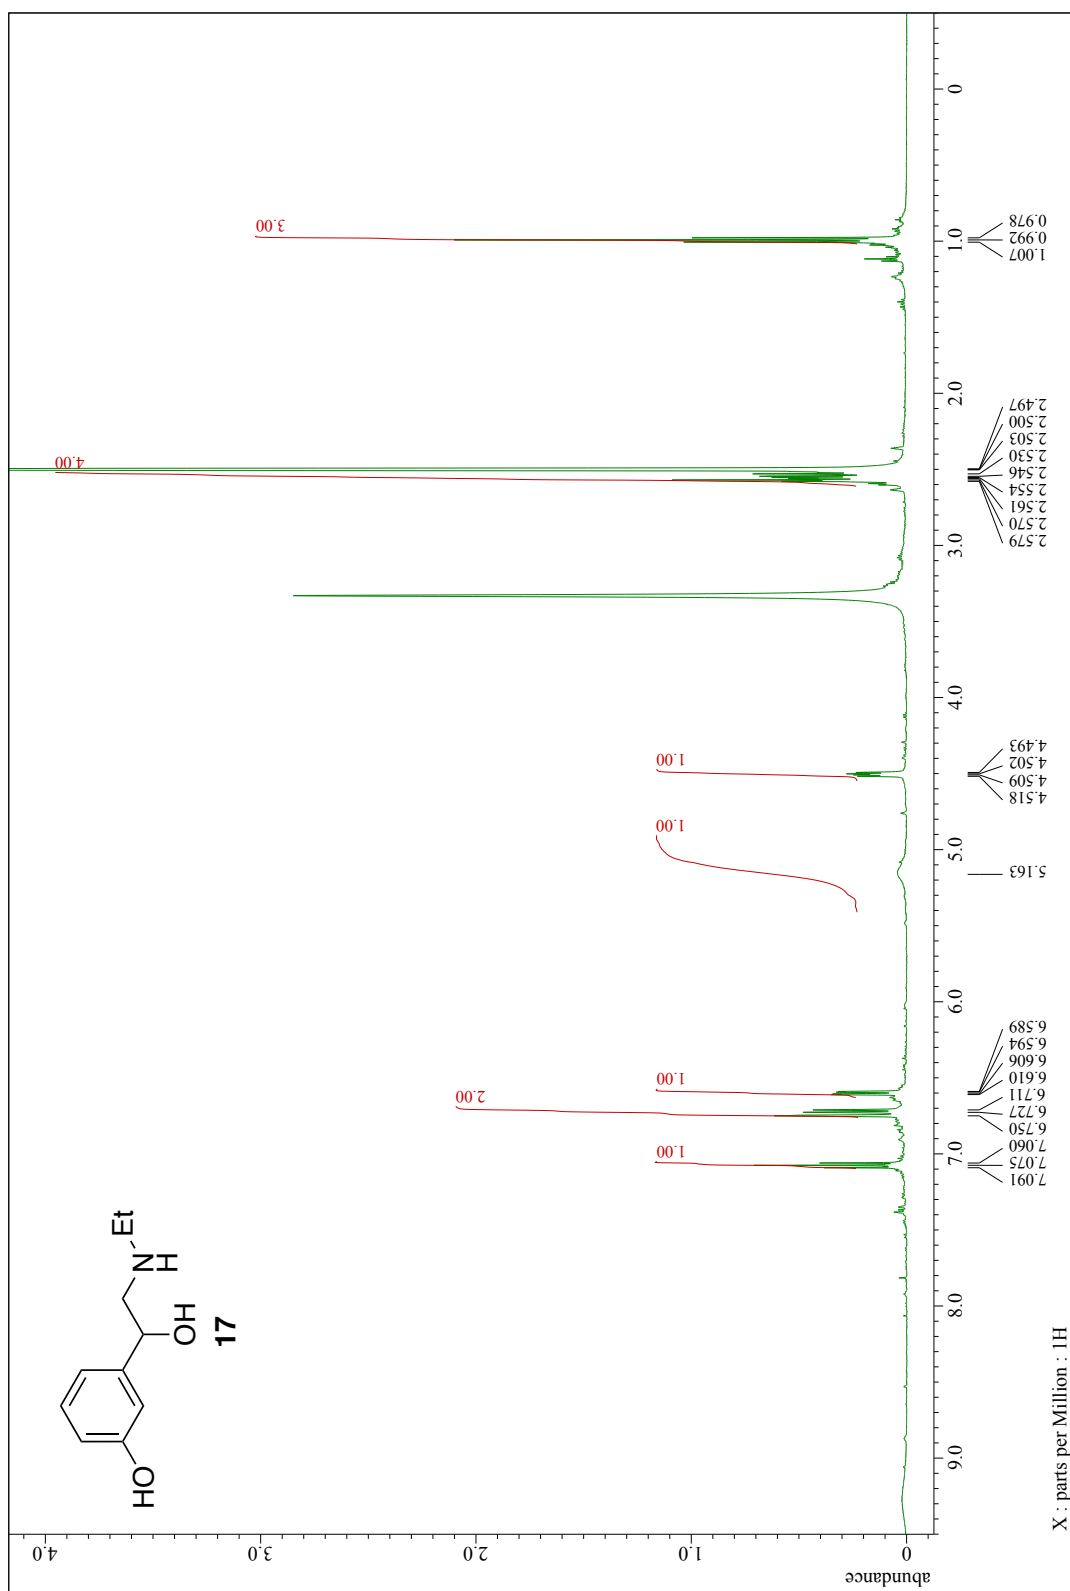

**<sup>13</sup>C NMR spectrum of 17 (126 MHz, DMSO-*d*<sub>6</sub>)**

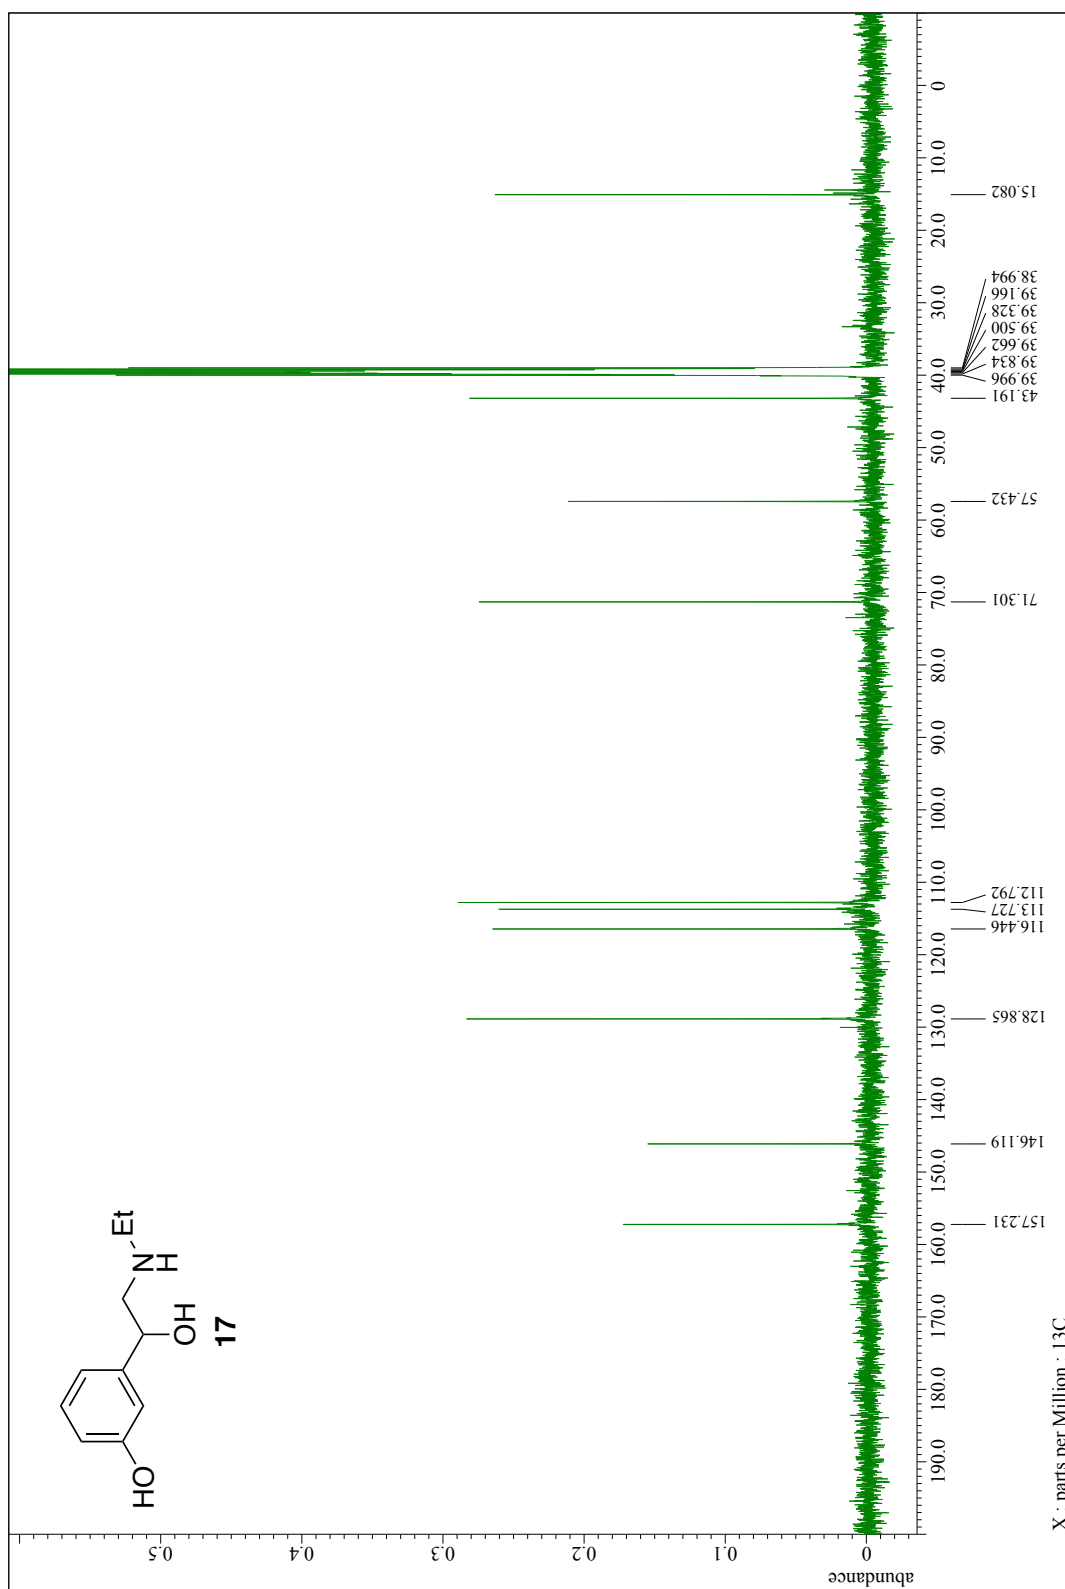

**<sup>1</sup>H NMR spectrum of 18 (500 MHz, DMSO-d6)**

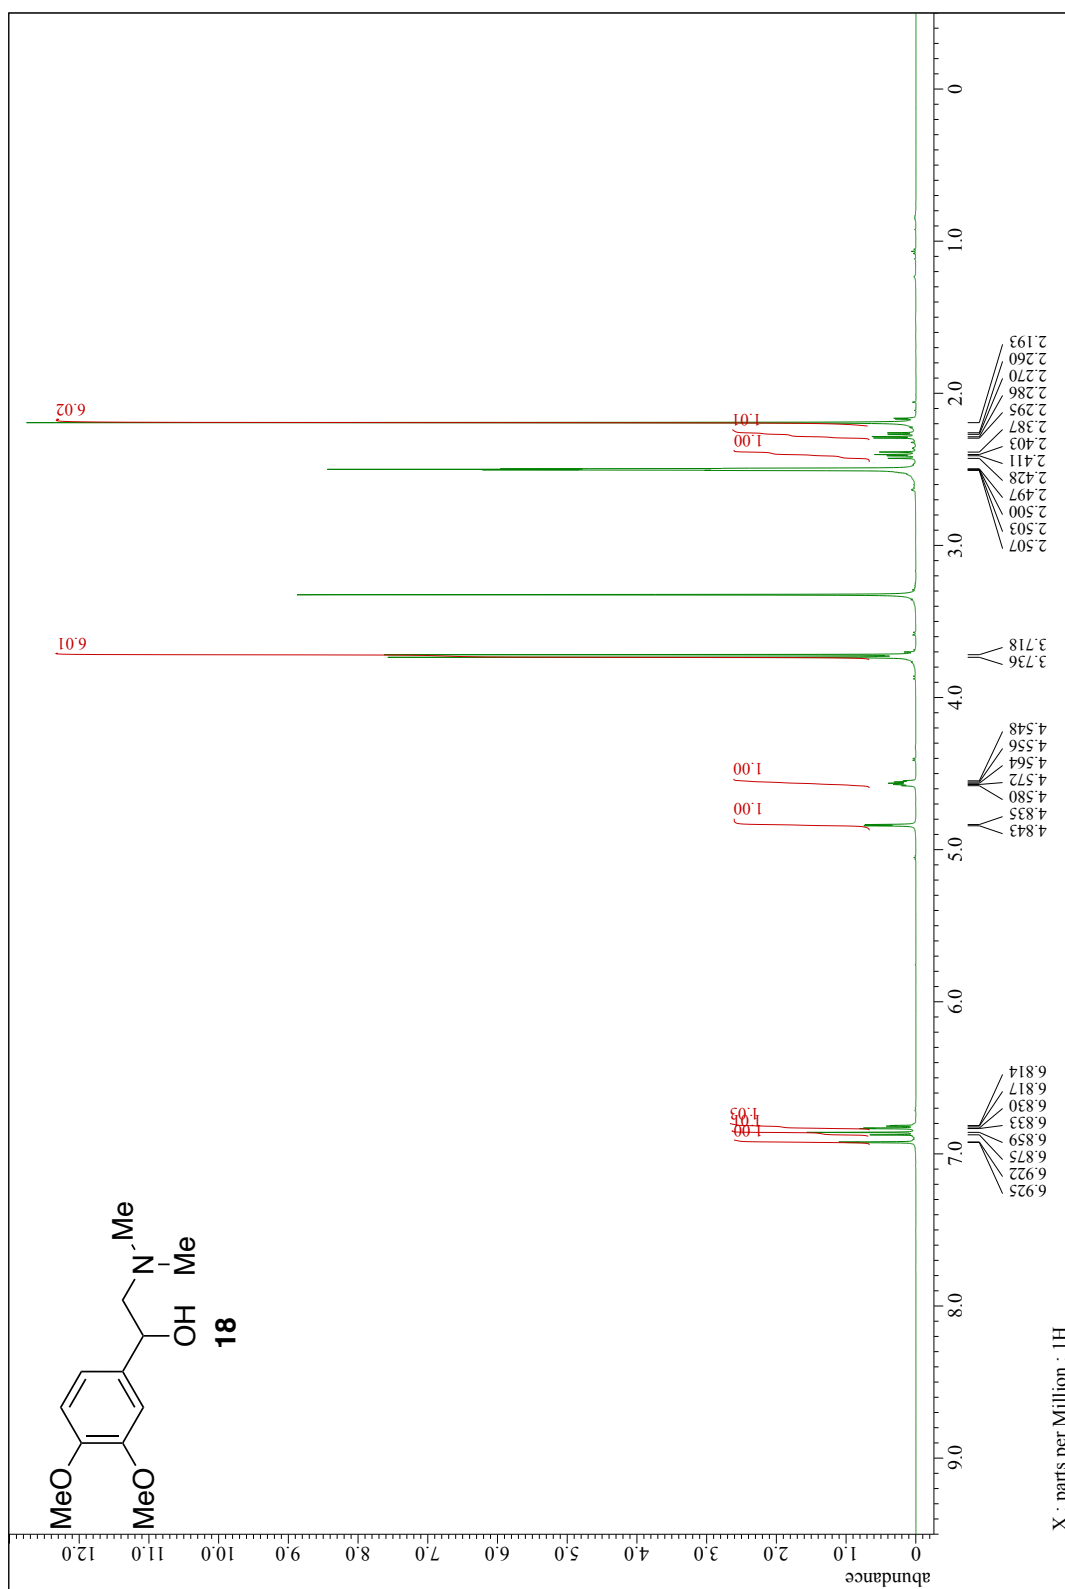

**<sup>13</sup>C NMR spectrum of 18 (126 MHz, DMSO-*d*<sub>6</sub>)**

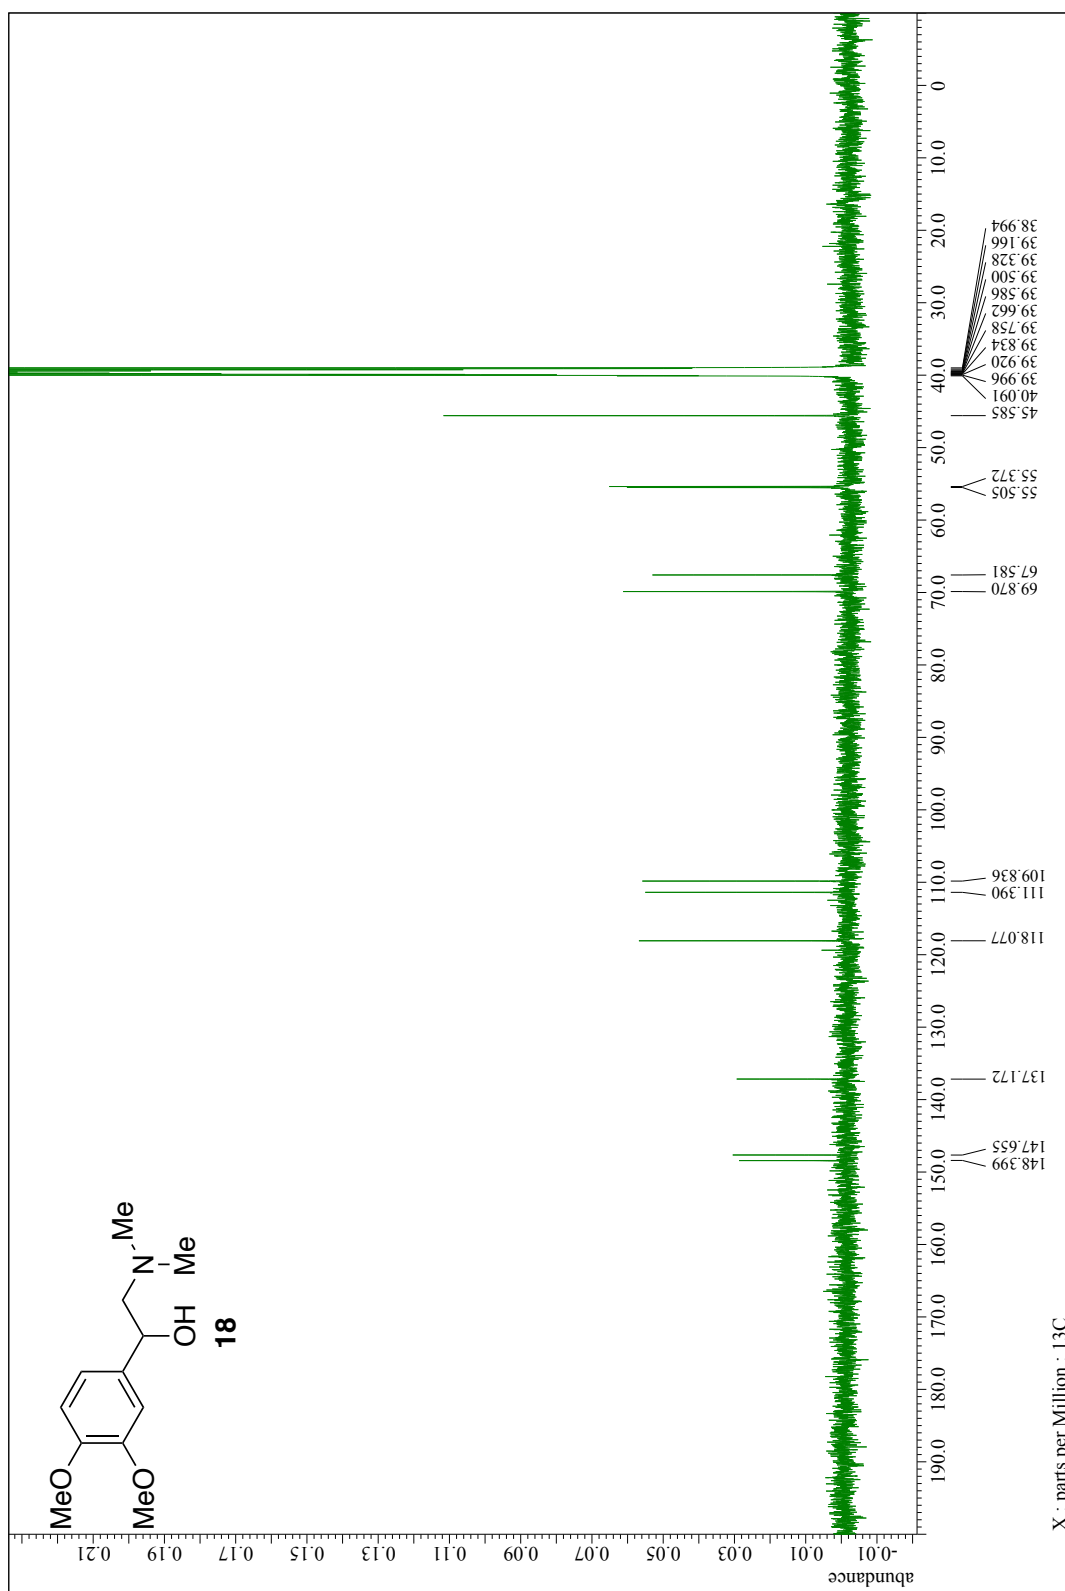

Supplement: d4ob02022g1.pdf [file d4ob02022g1.pdf]
